# Supplementary material for: Novel Seleno- and Thio-Urea Containing Dihydropyrrol-2-One Analogues as Antibacterial Agents
Source: PubMed Central journal article supplement (PMC8003518; doi:10.3390/antibiotics10030321), 2021-03-19
Supplement: antibiotics-10-00321-s001.pdf [file antibiotics-10-00321-s001.pdf]

# Novel Seleno- and Thio-urea Containing Dihydropyrrol-2-one Analogues as Antibacterial Agents

Shekh Sabir<sup>1</sup>, Tsz Tin Yu,<sup>1</sup> Rajesh Kuppasamy,<sup>1</sup> Basmah Almohaywi,<sup>2</sup> George Iskander,<sup>1</sup> Theerthankar Das,<sup>3</sup> Mark Willcox,<sup>4</sup> David StC. Black,<sup>1</sup> and Naresh Kumar<sup>1\*</sup>

<sup>1</sup> School of Chemistry, The University of New South Wales, NSW 2052 Sydney, Australia; [s.sabir@student.unsw.edu.au](mailto:s.sabir@student.unsw.edu.au) (S.S.); [tsztin.yu@unsw.edu.au](mailto:tsztin.yu@unsw.edu.au) (T. T.Y.); [r.kuppasamy@ad.unsw.edu.au](mailto:r.kuppasamy@ad.unsw.edu.au) (R.K.); [g.iskanderb@gmail.com](mailto:g.iskanderb@gmail.com) (G. I.); [d.black@unsw.edu.au](mailto:d.black@unsw.edu.au) (D.S.B.)

<sup>2</sup> School of Pharmacy, King Khalid University Abha 6142, Saudi Arabia, [bal-mohawe@kku.edu.sa](mailto:bal-mohawe@kku.edu.sa) (B.A.)

<sup>3</sup> Department of Infectious Diseases and Immunology, School of Medical Sciences, The University of Sydney, NSW 2006 Sydney, Australia; [das.ashishkumar@sydney.edu.au](mailto:das.ashishkumar@sydney.edu.au) (T.D.)

<sup>4</sup> School of Optometry and Vision Science, The University of New South Wales, NSW 2052 Sydney, [m.willcox@unsw.edu.au](mailto:m.willcox@unsw.edu.au) (M.W.)

\* Correspondence: [n.kumar@unsw.edu.au](mailto:n.kumar@unsw.edu.au); Tel.: +61-29385-4698; Fax: +61-29385-6141

## Contents

|                                                                       |         |
|-----------------------------------------------------------------------|---------|
| <sup>1</sup> H and <sup>13</sup> C NMR spectra of the compounds ..... | S2-S32  |
| <sup>77</sup> Se NMR spectrum of compound <b>3e</b> .....             | S12     |
| HRMS data of the compounds.....                                       | S33-S47 |
| IR Spectra of compounds.....                                          | S48-S52 |
| Growth inhibition data ( <i>P.aeruginosa</i> MH602).....              | S53     |

<sup>1</sup>H NMR spectrum of compound **3a**

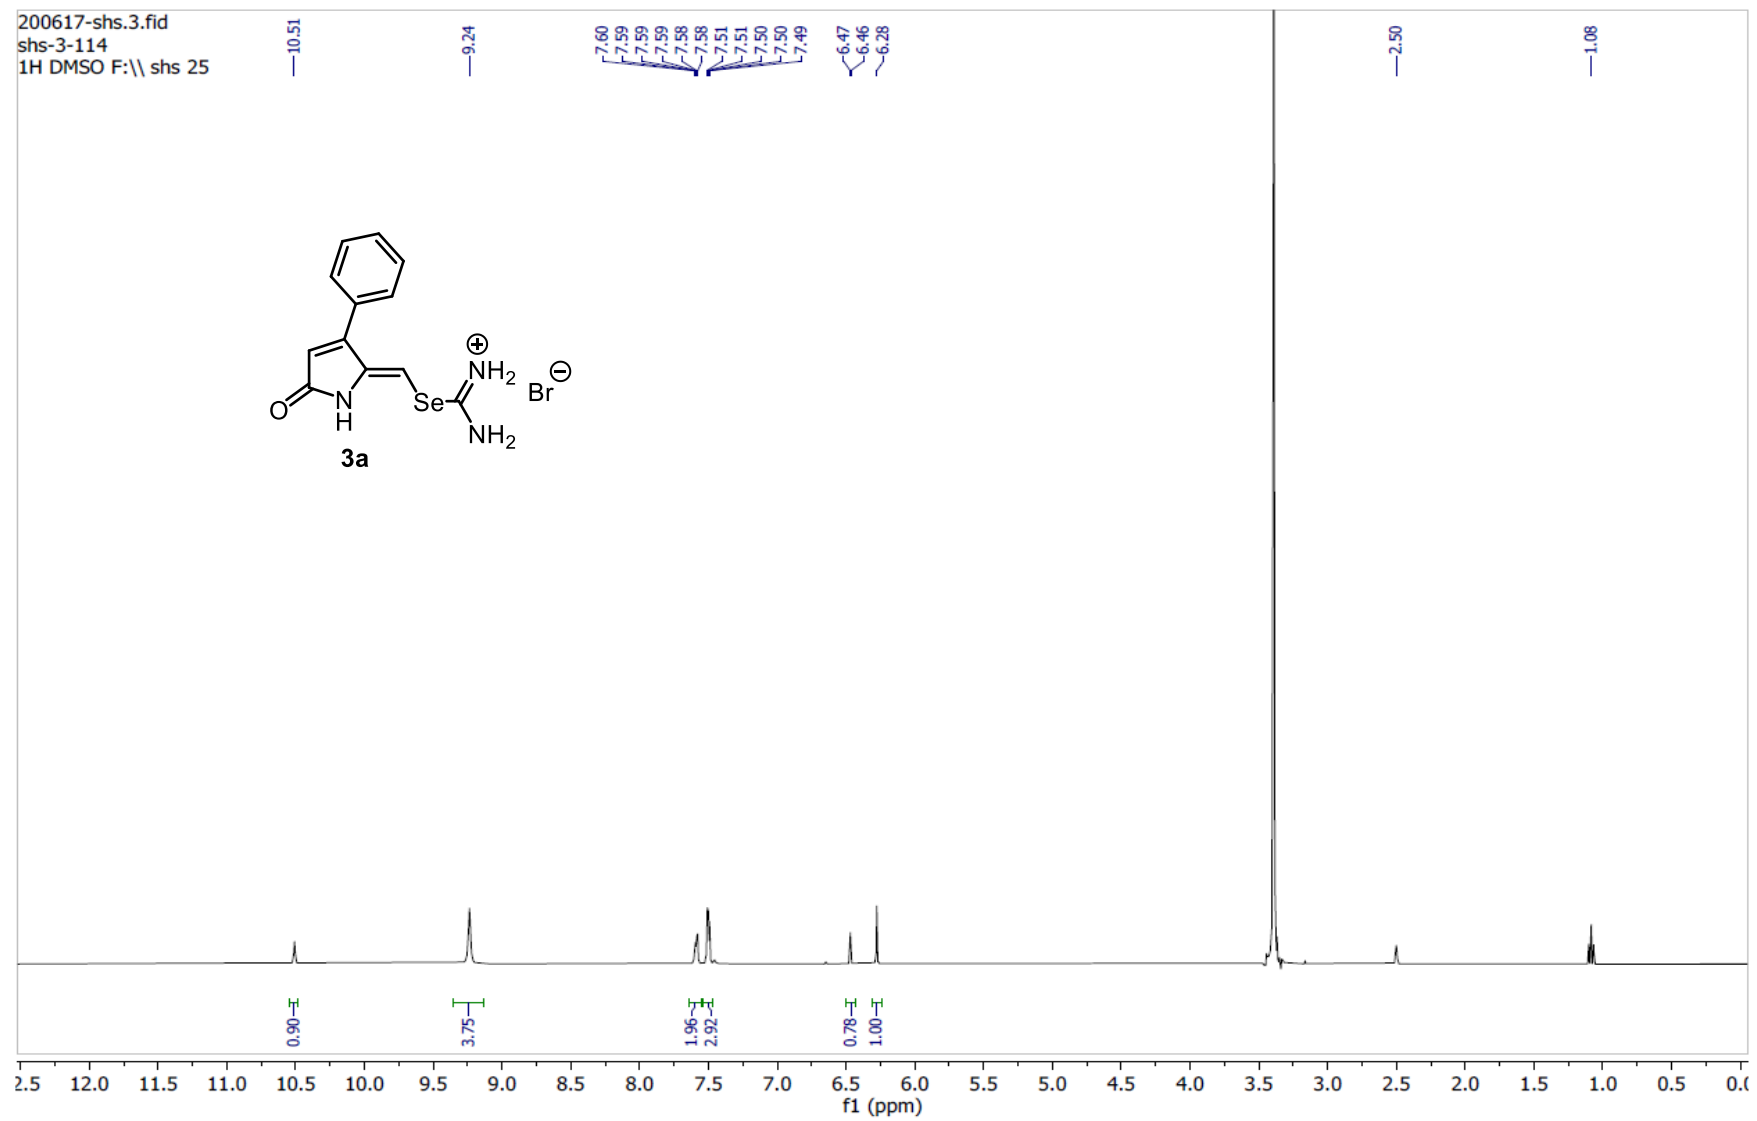

<sup>13</sup>C NMR spectrum of compound **3a**

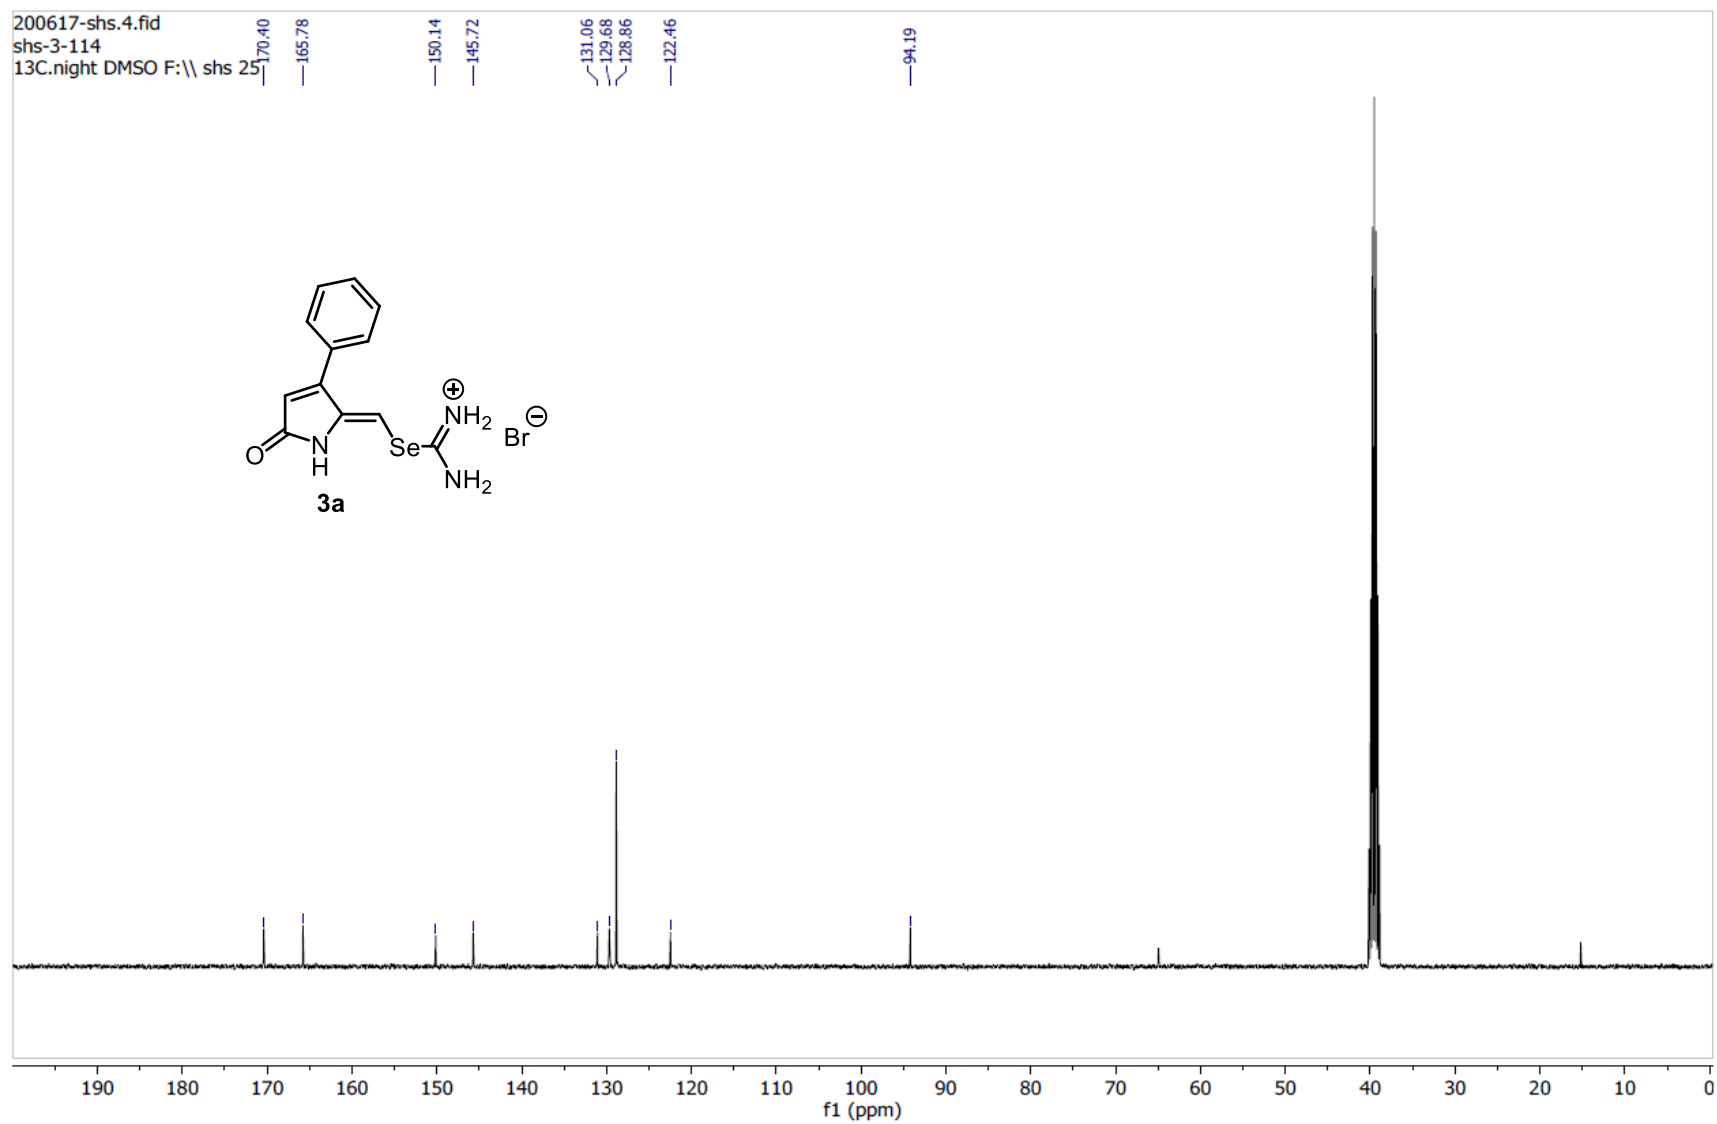

<sup>1</sup>H NMR spectrum of compound **3b**

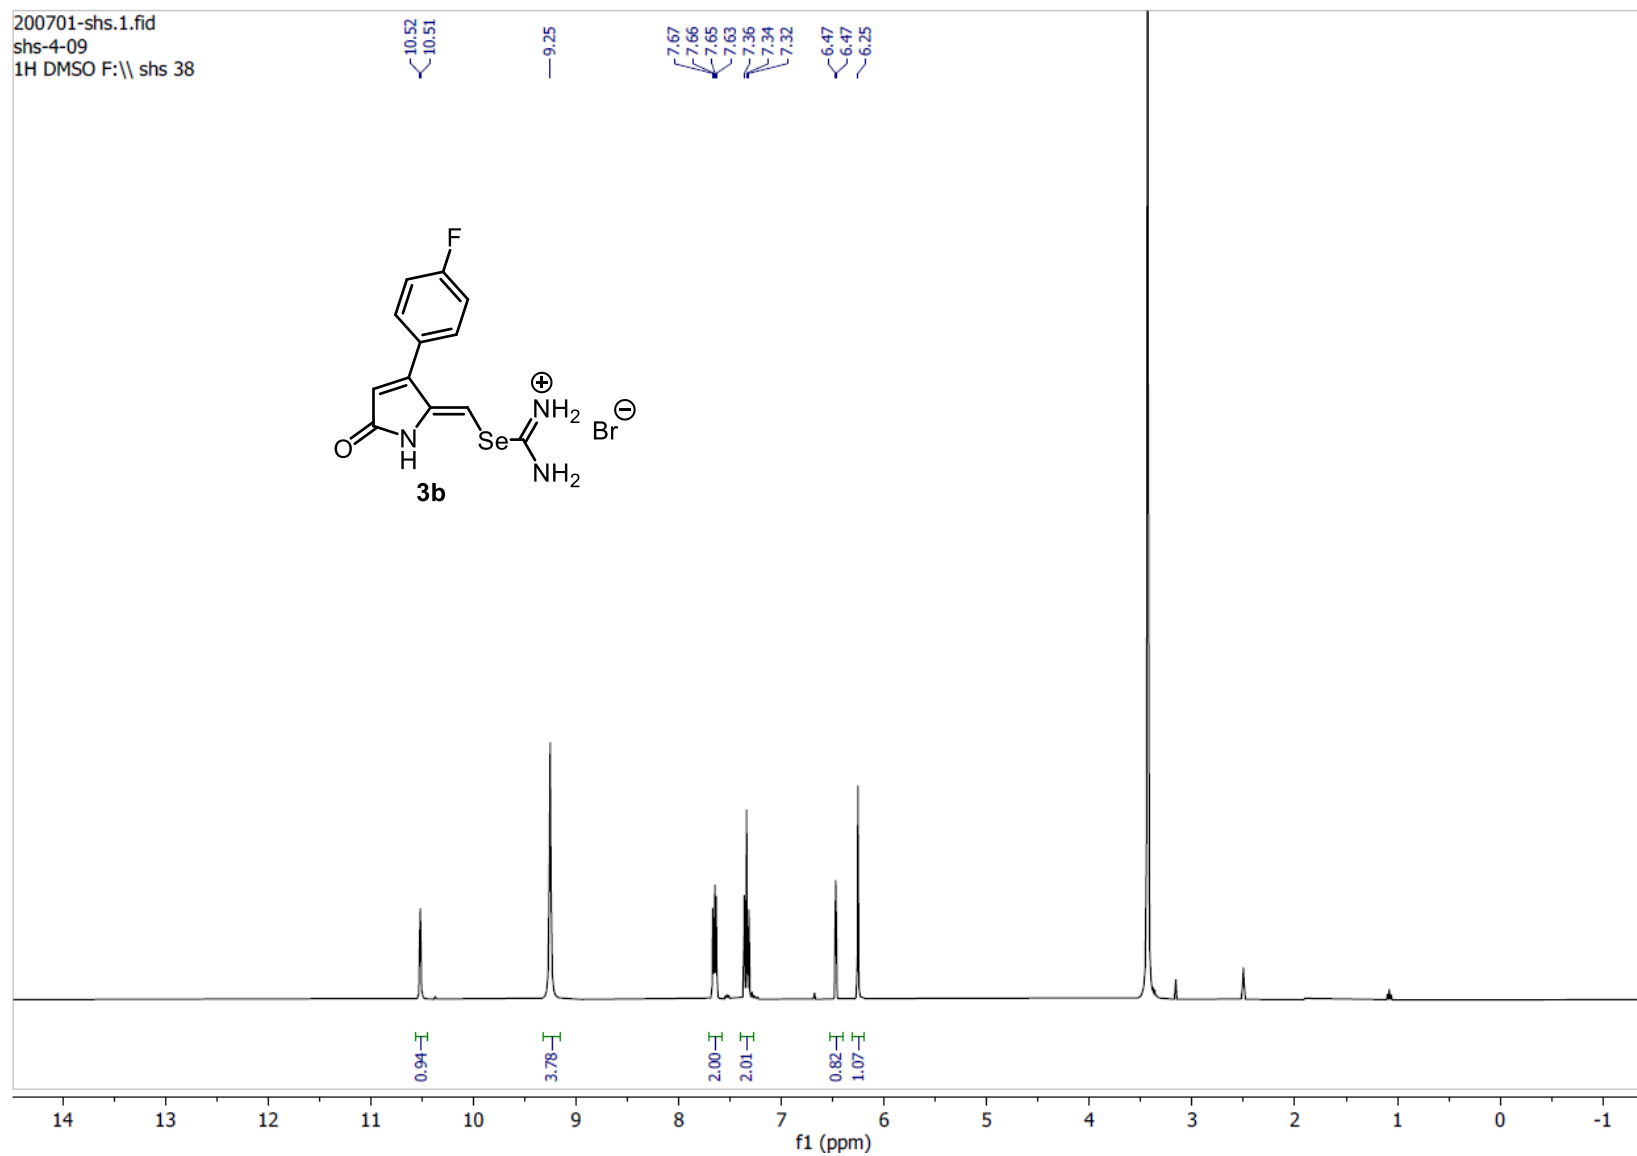

<sup>13</sup>C NMR spectrum of compound **3b**

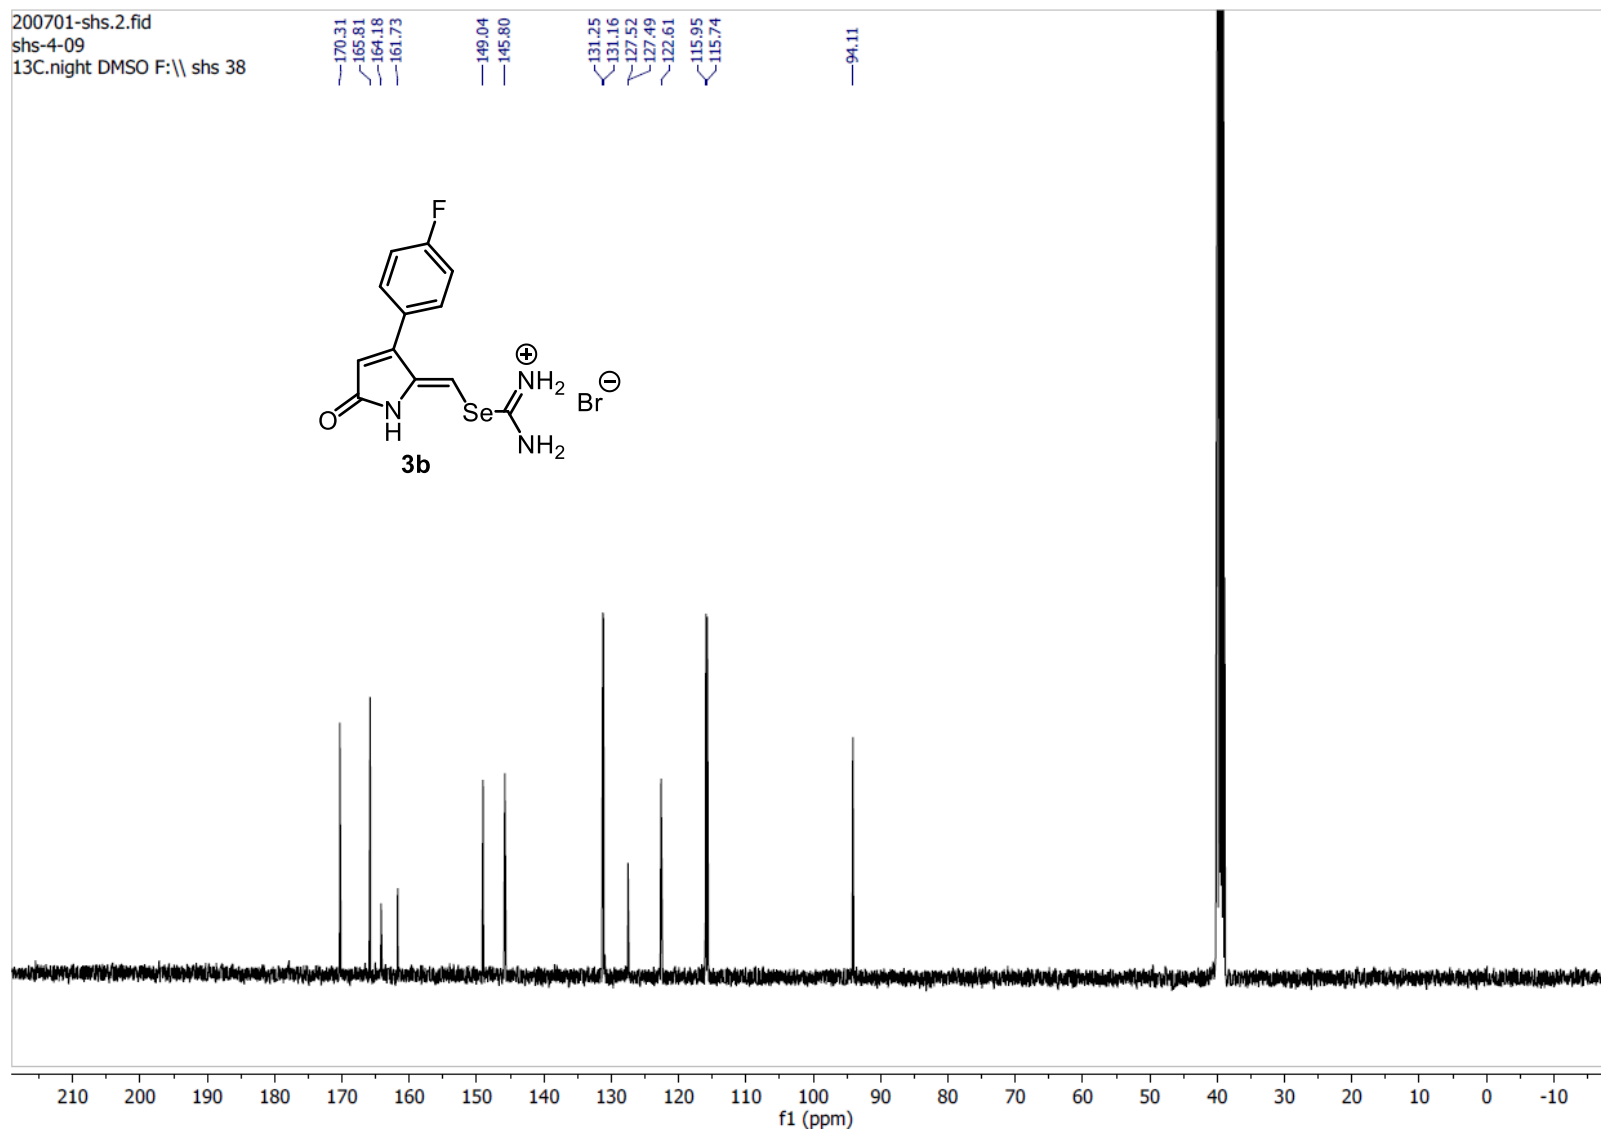

<sup>1</sup>H NMR spectrum of compound **3c**

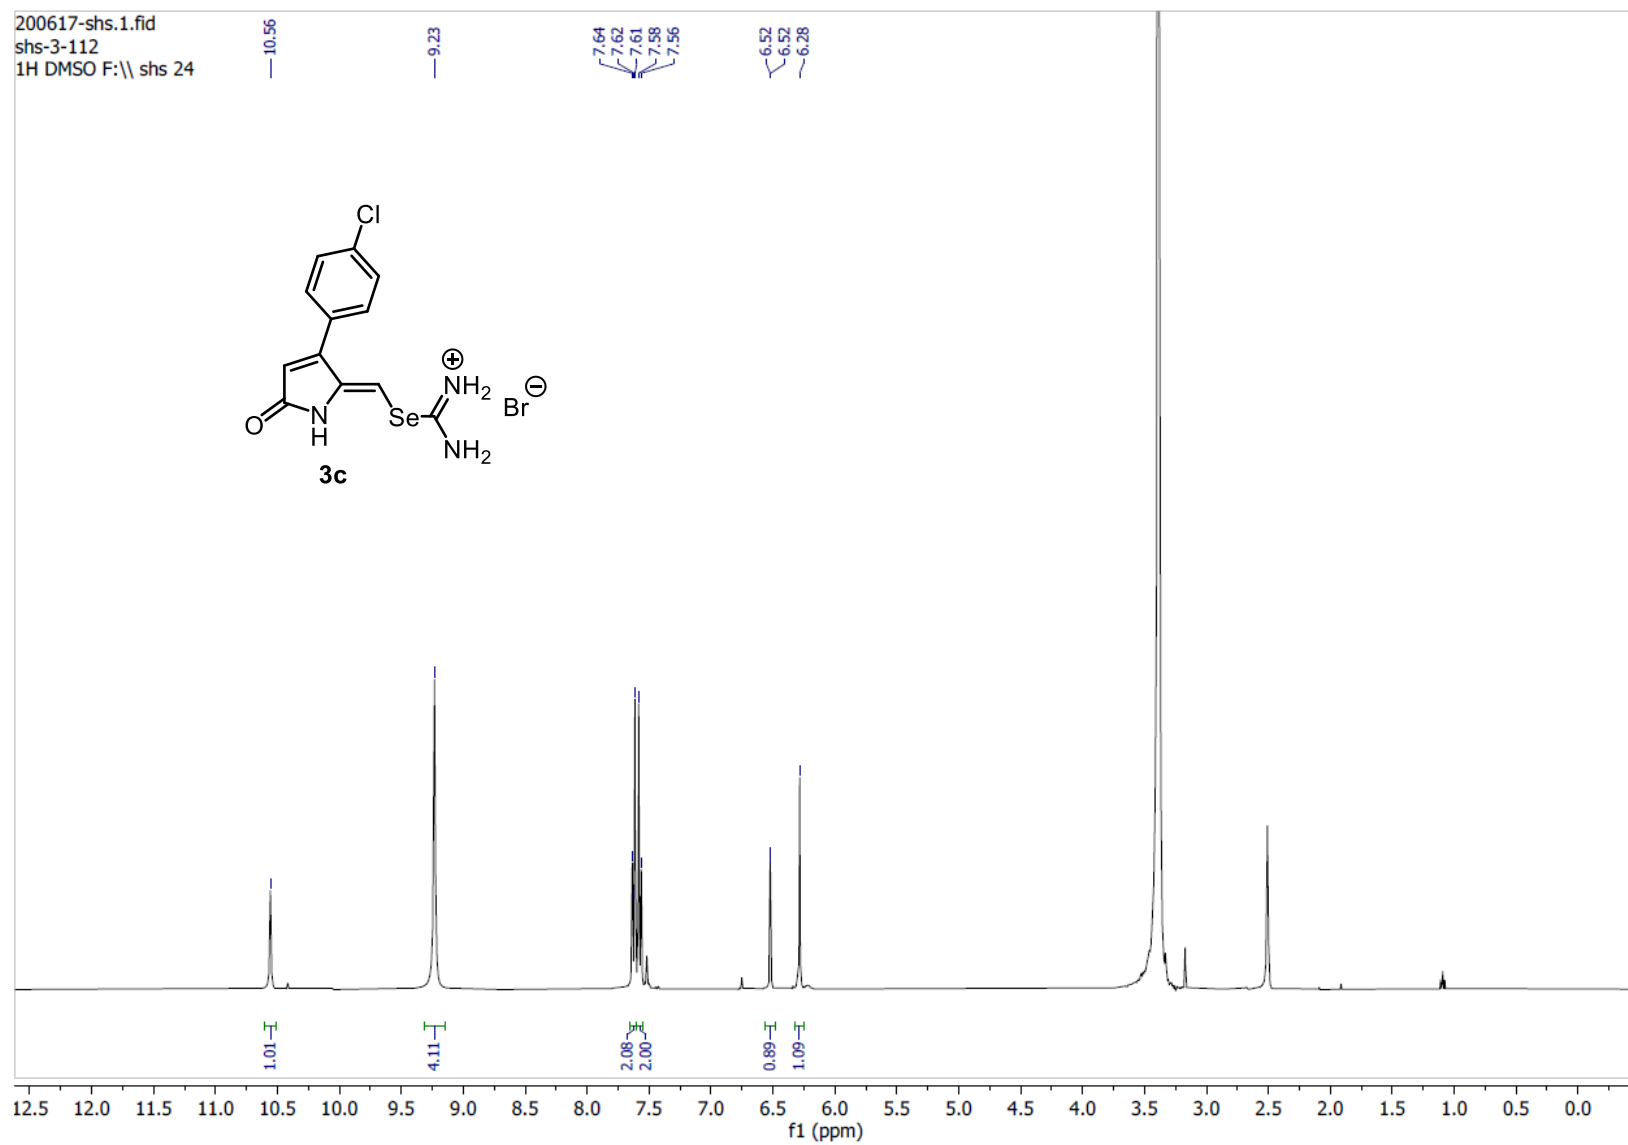

<sup>13</sup>C NMR spectrum of compound **3c**

200617-shs.2.fid  
shs-3-112  
13C.night DMSO F:\ shs 24

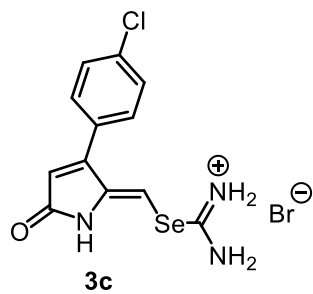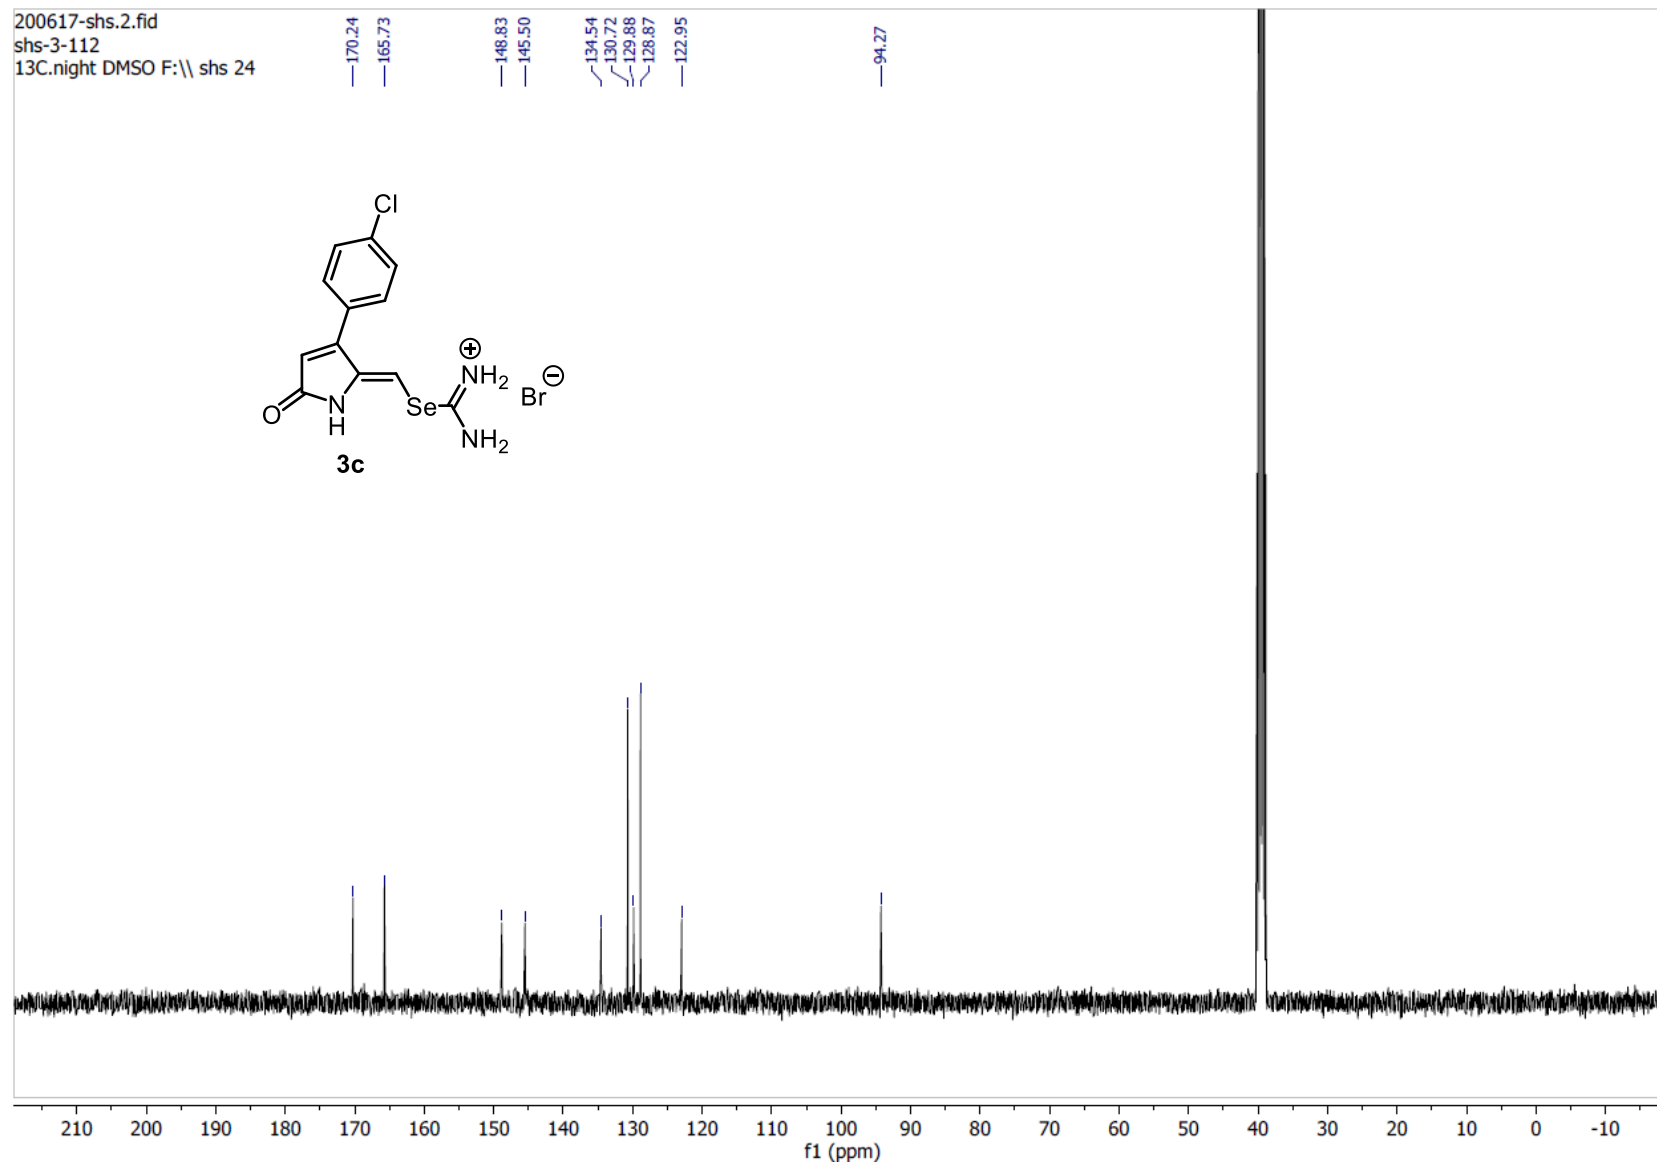

<sup>1</sup>H NMR spectrum of compound **3d**

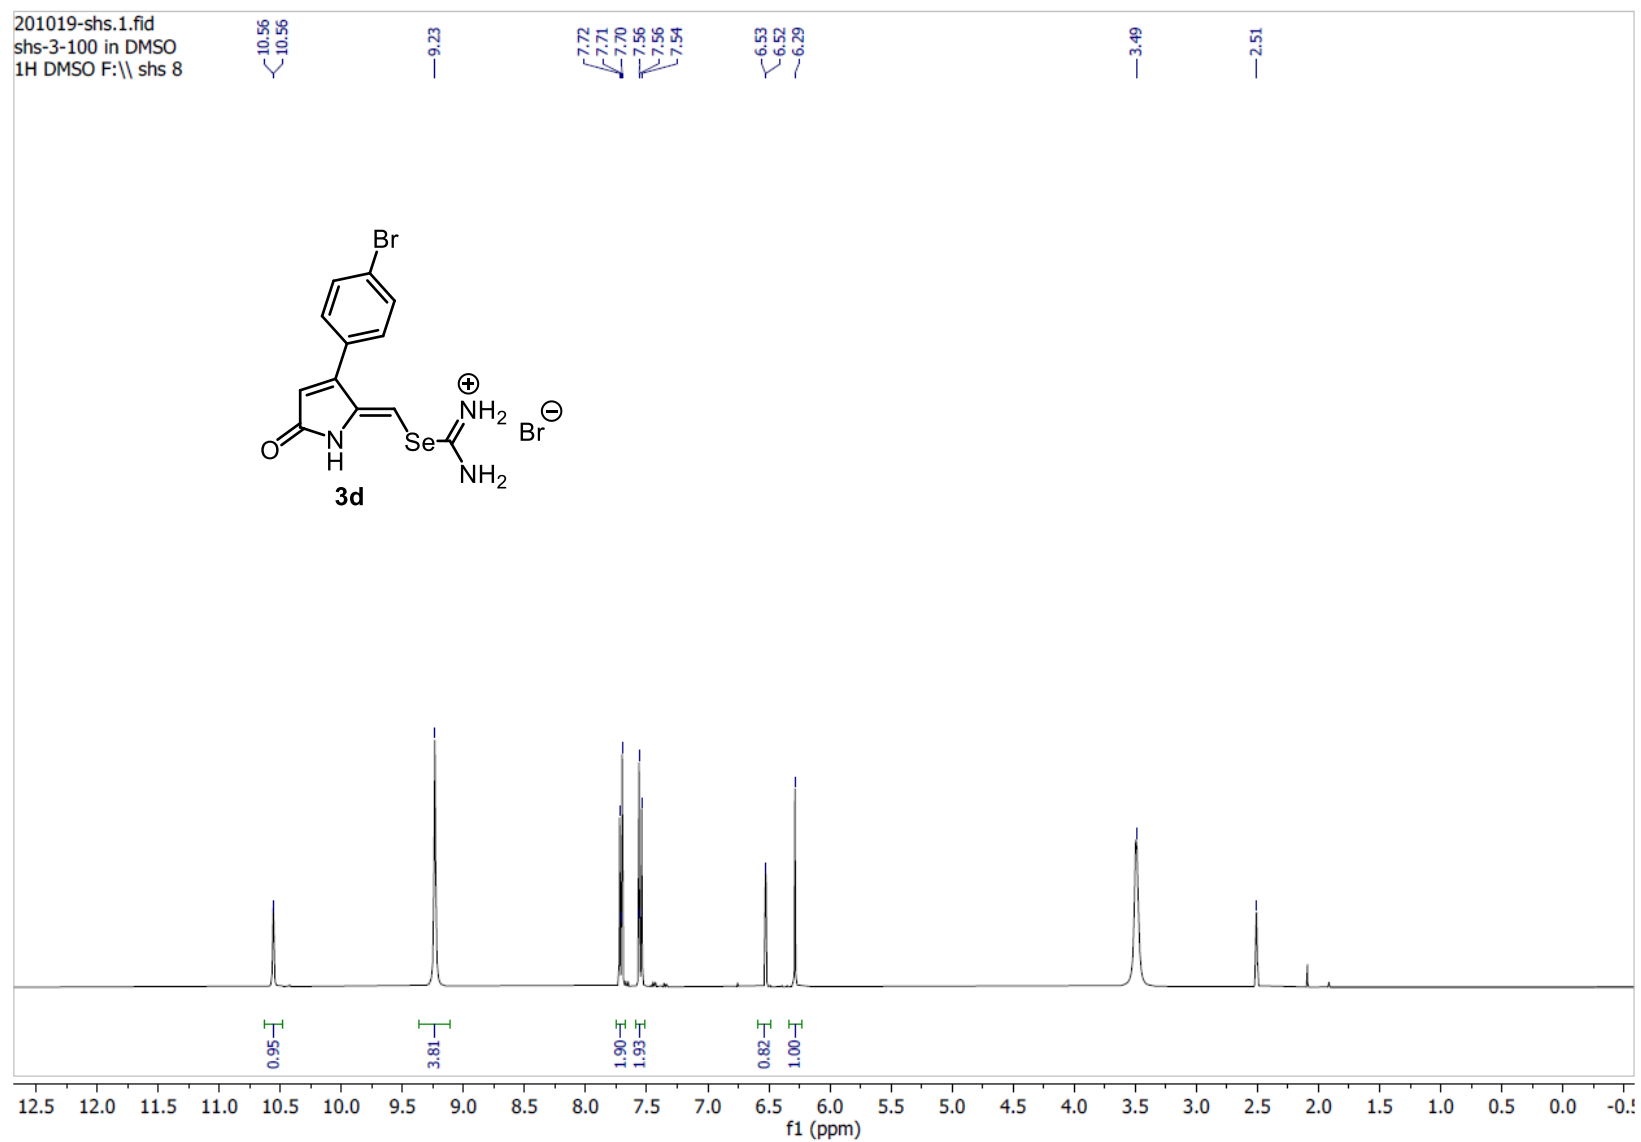



$^{13}\text{C}$  NMR spectrum of compound **3d**

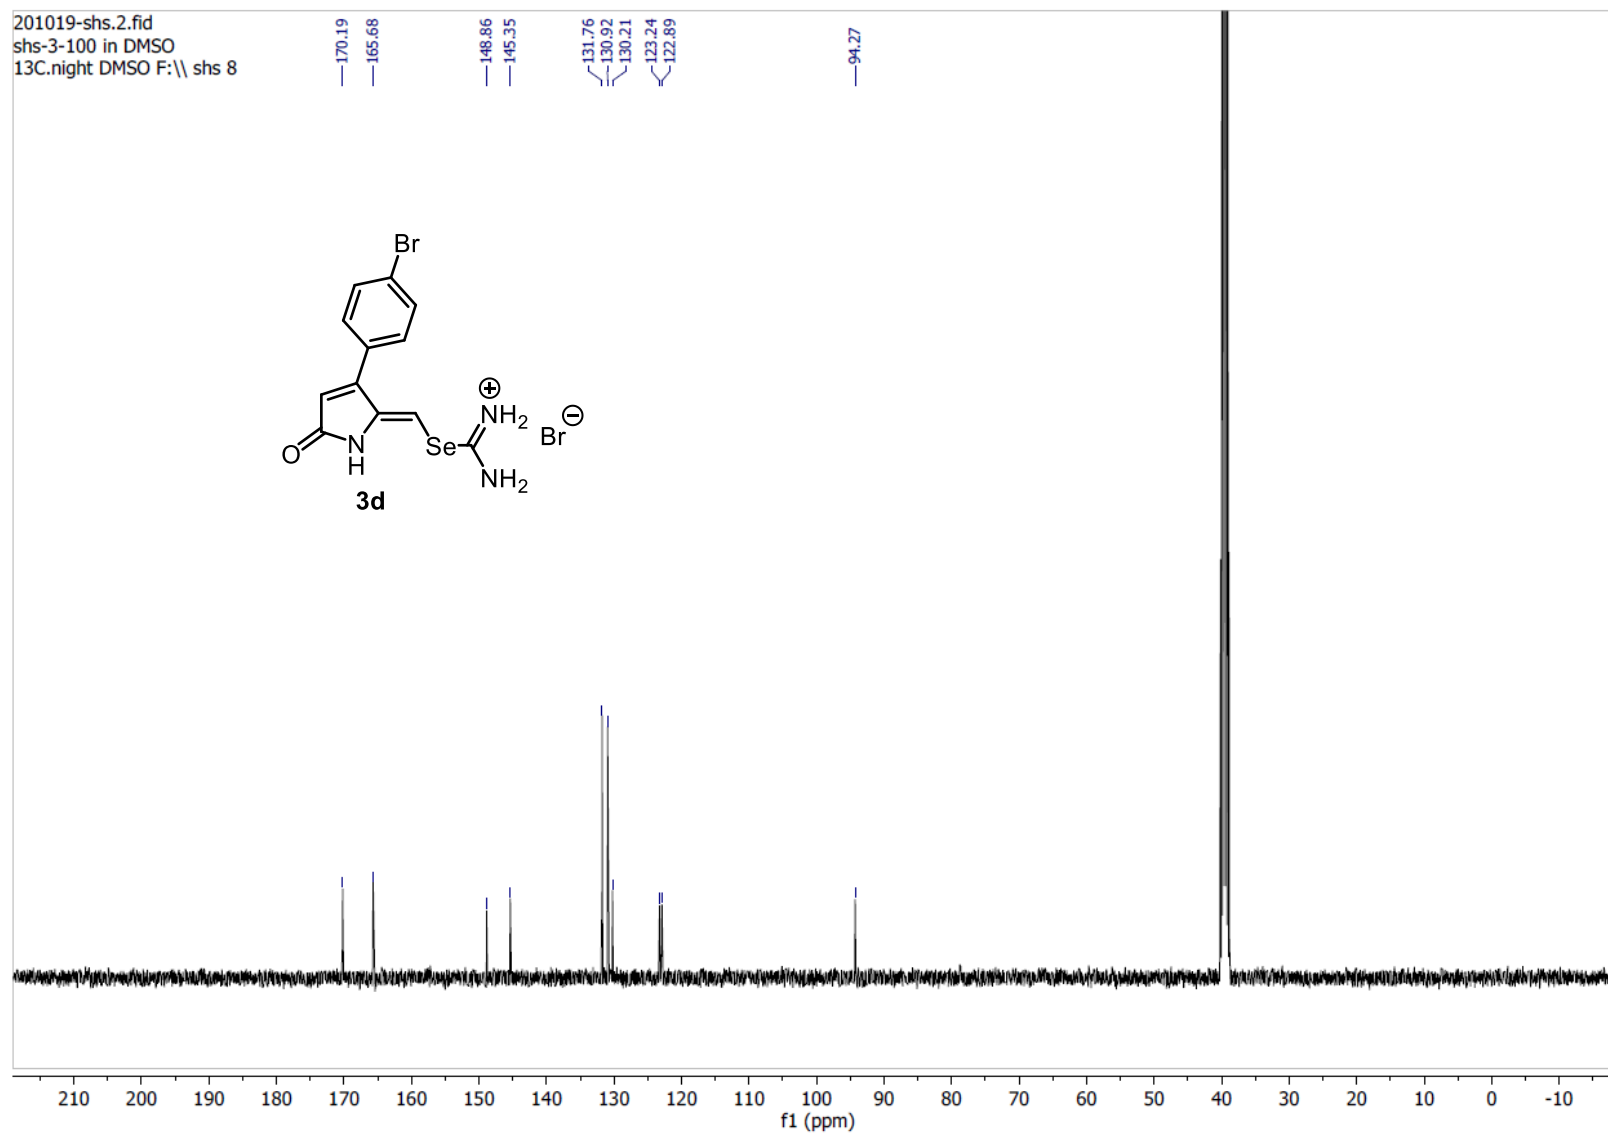

<sup>1</sup>H NMR spectrum of compound **3e**

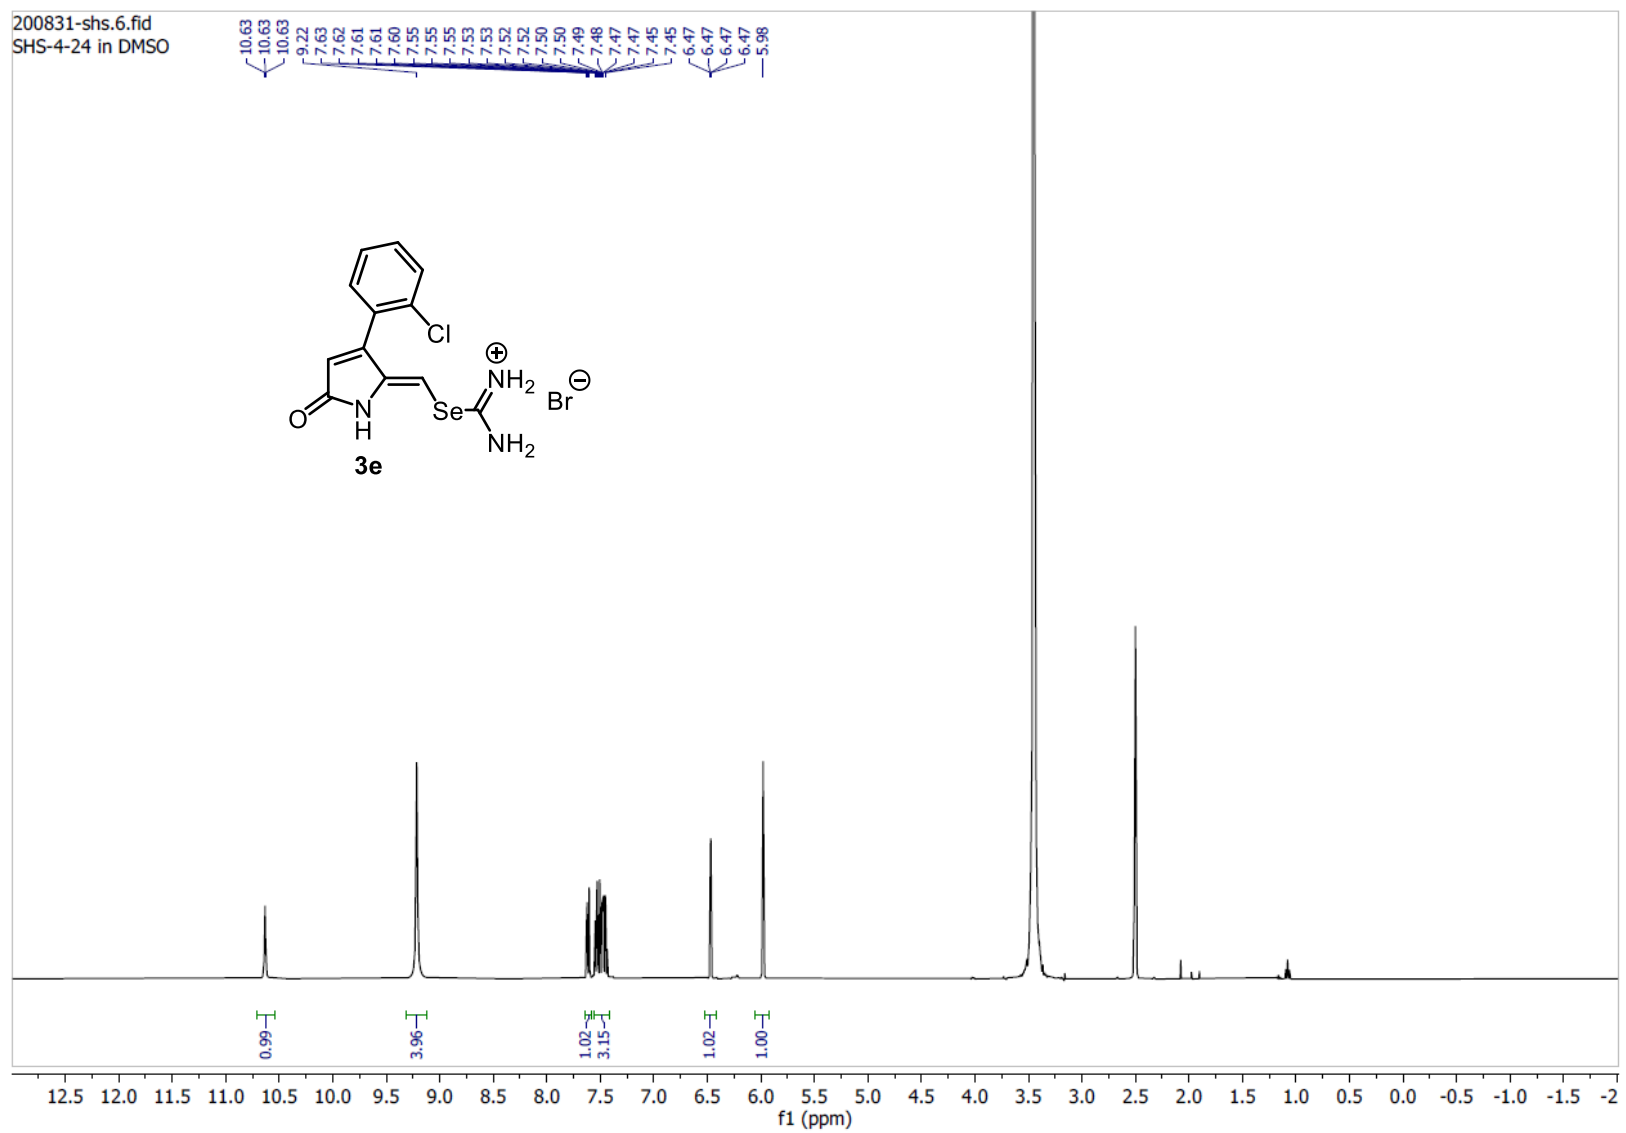

<sup>13</sup>C NMR spectrum of compound **3e**

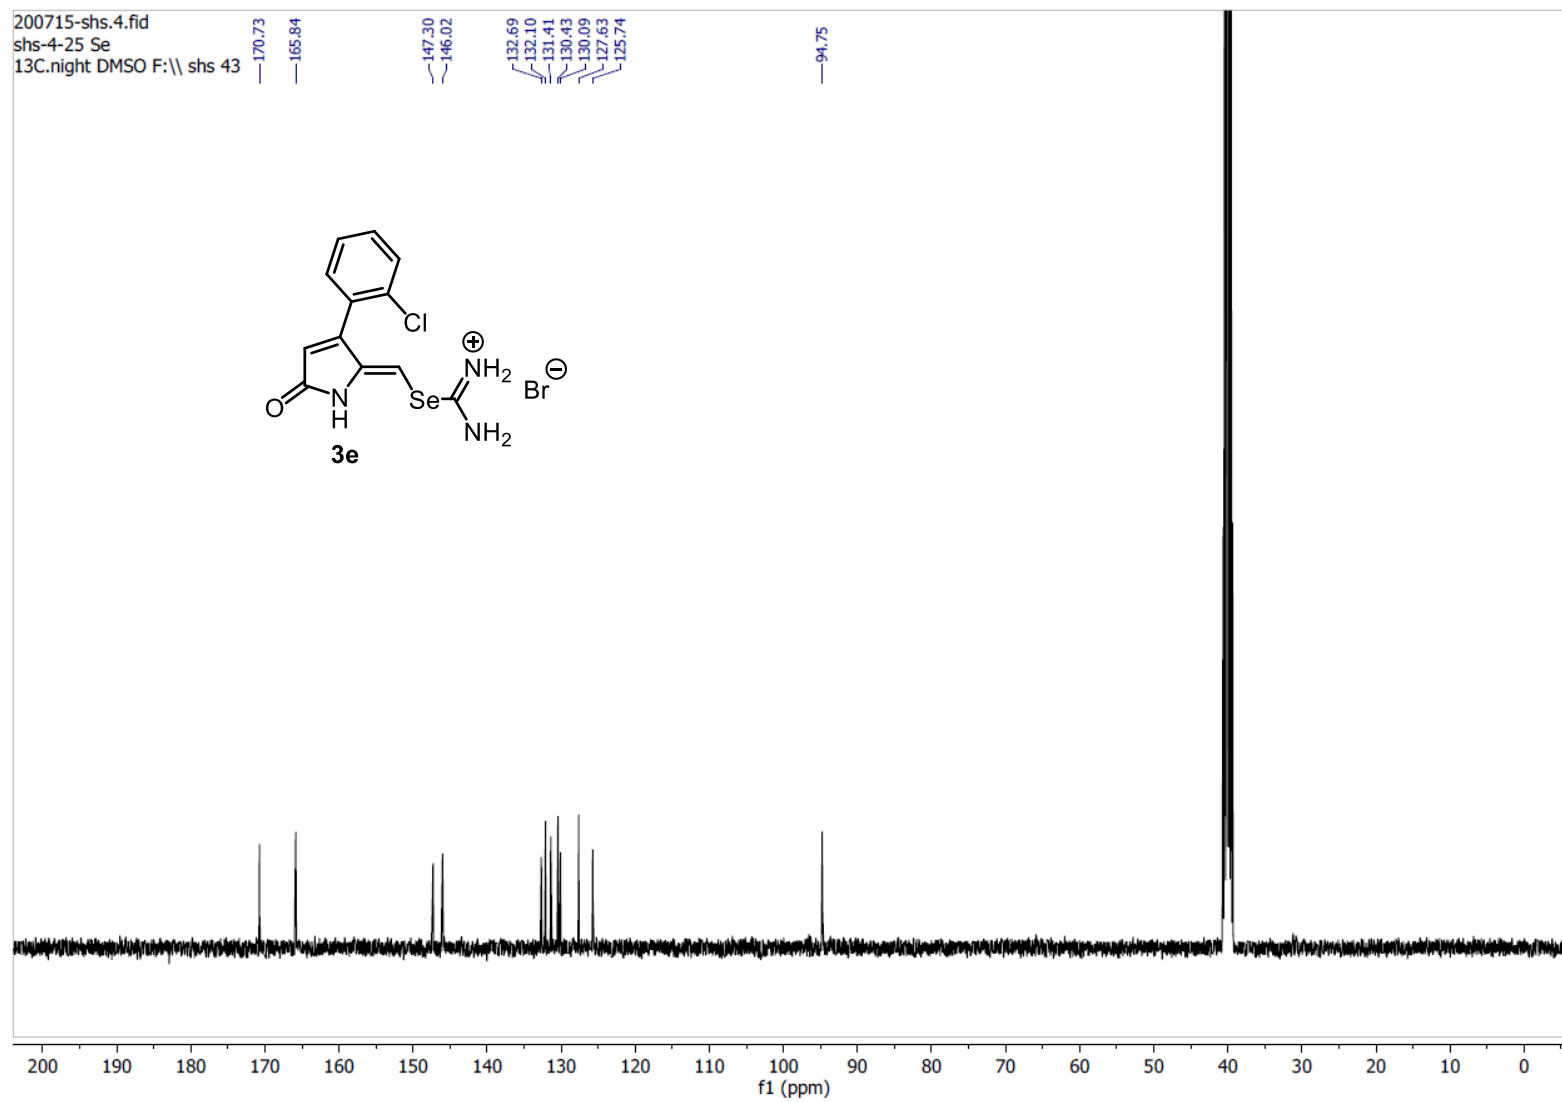

$^{77}\text{Se}$  NMR spectrum of compound **3e**

200831-shs.3.fid  
SHS-4-24 in DMSO  
with  $^1\text{H}$  decoupling

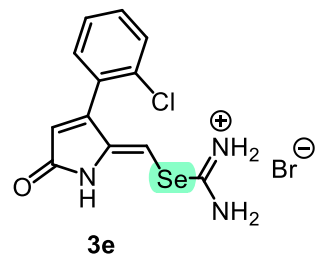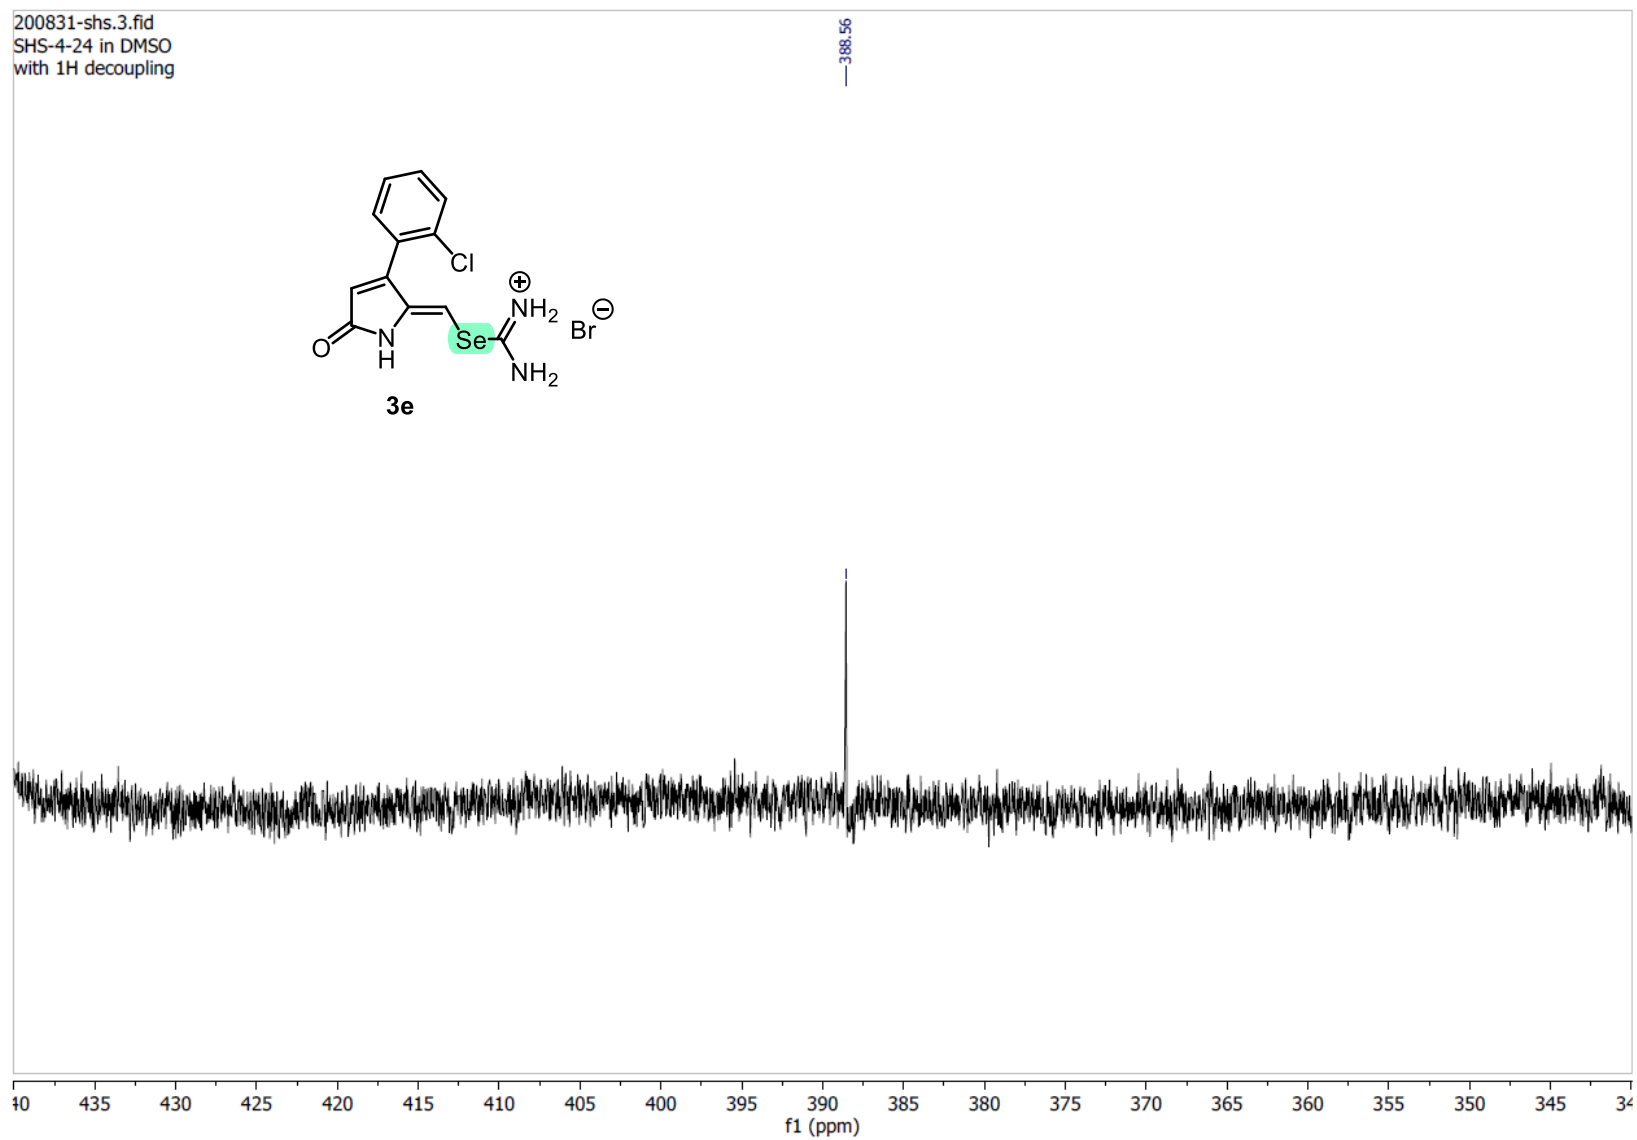

<sup>1</sup>H NMR spectrum of compound **3f**

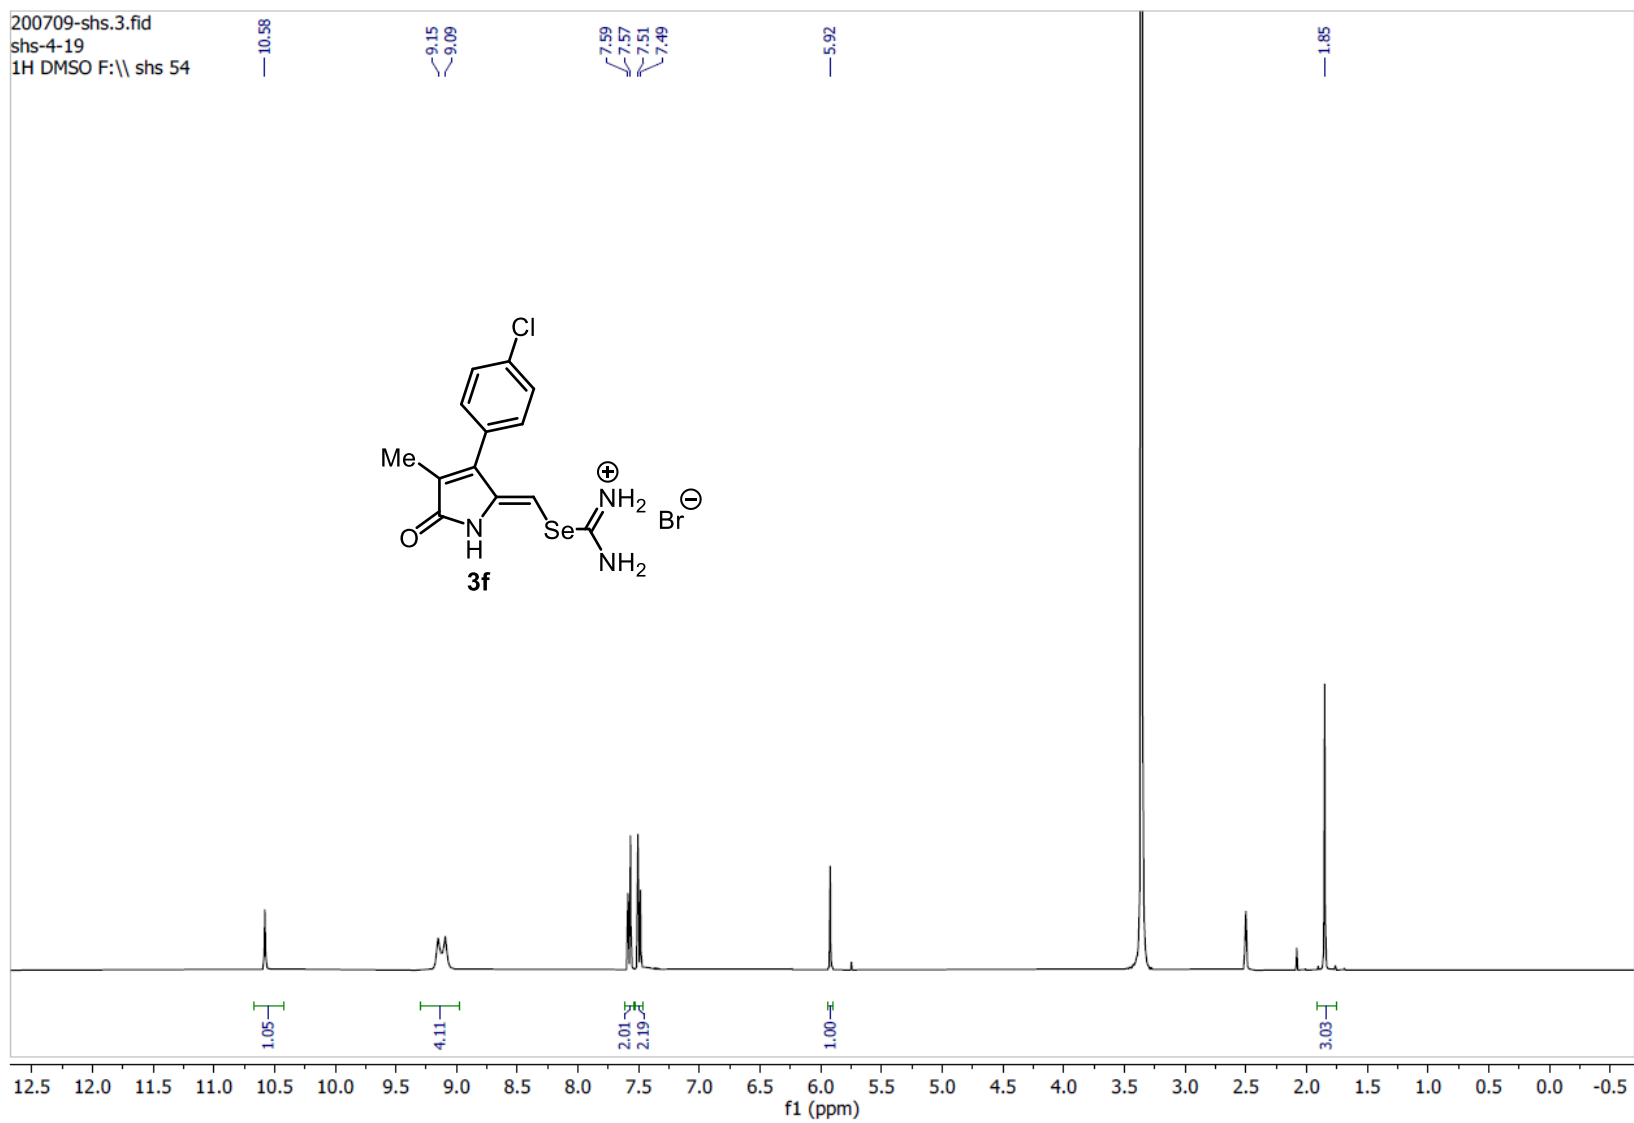

<sup>13</sup>C NMR spectrum of compound **3f**

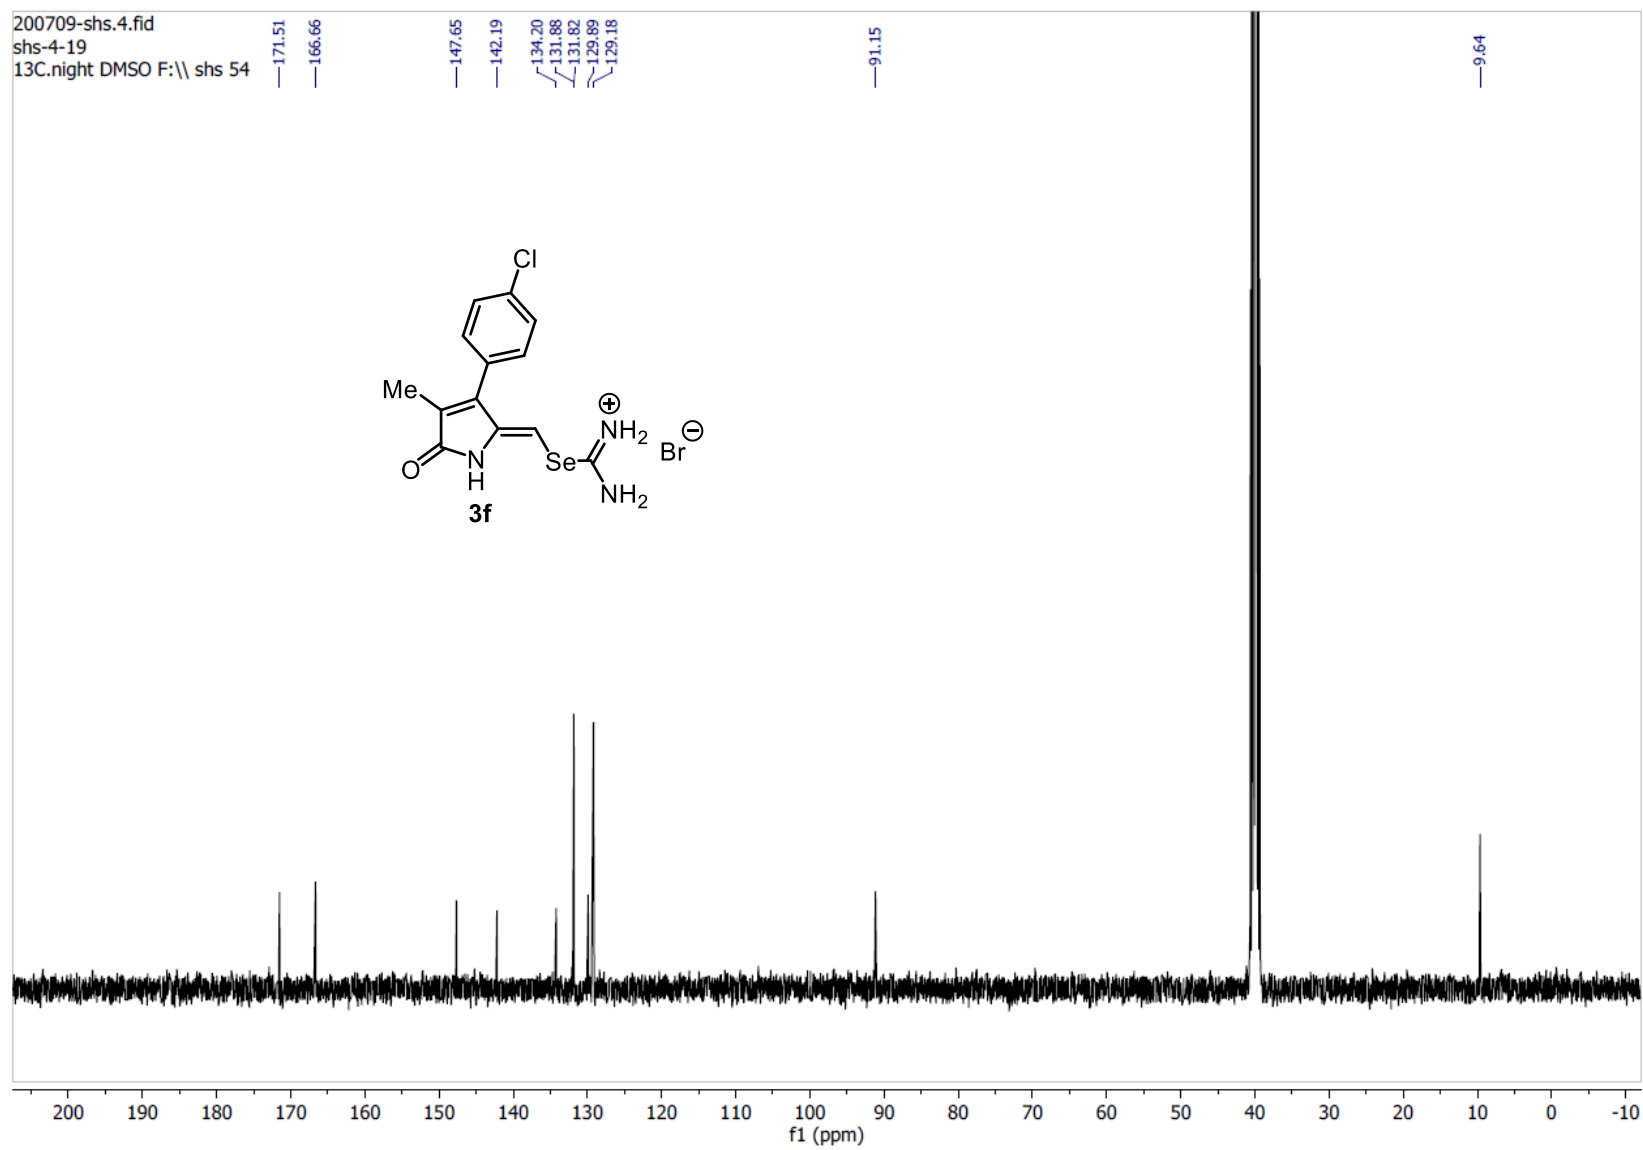

<sup>1</sup>H NMR spectrum of compound **3g**

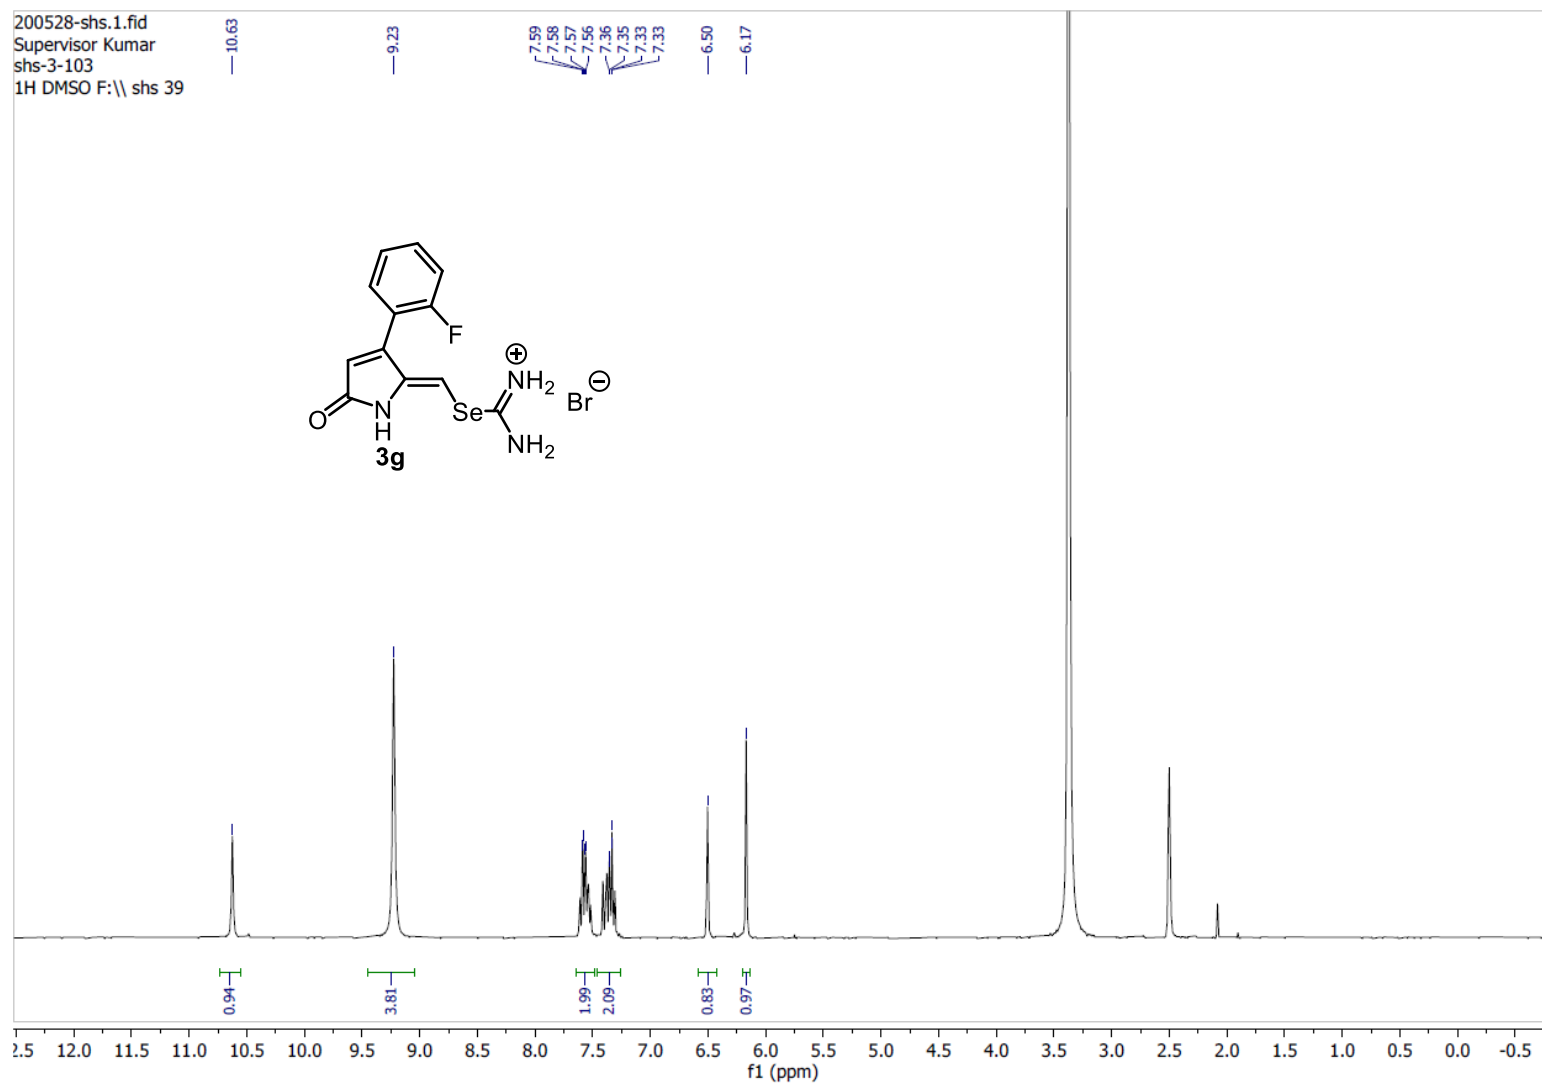

$^{13}\text{C}$  NMR spectrum of compound **3g**

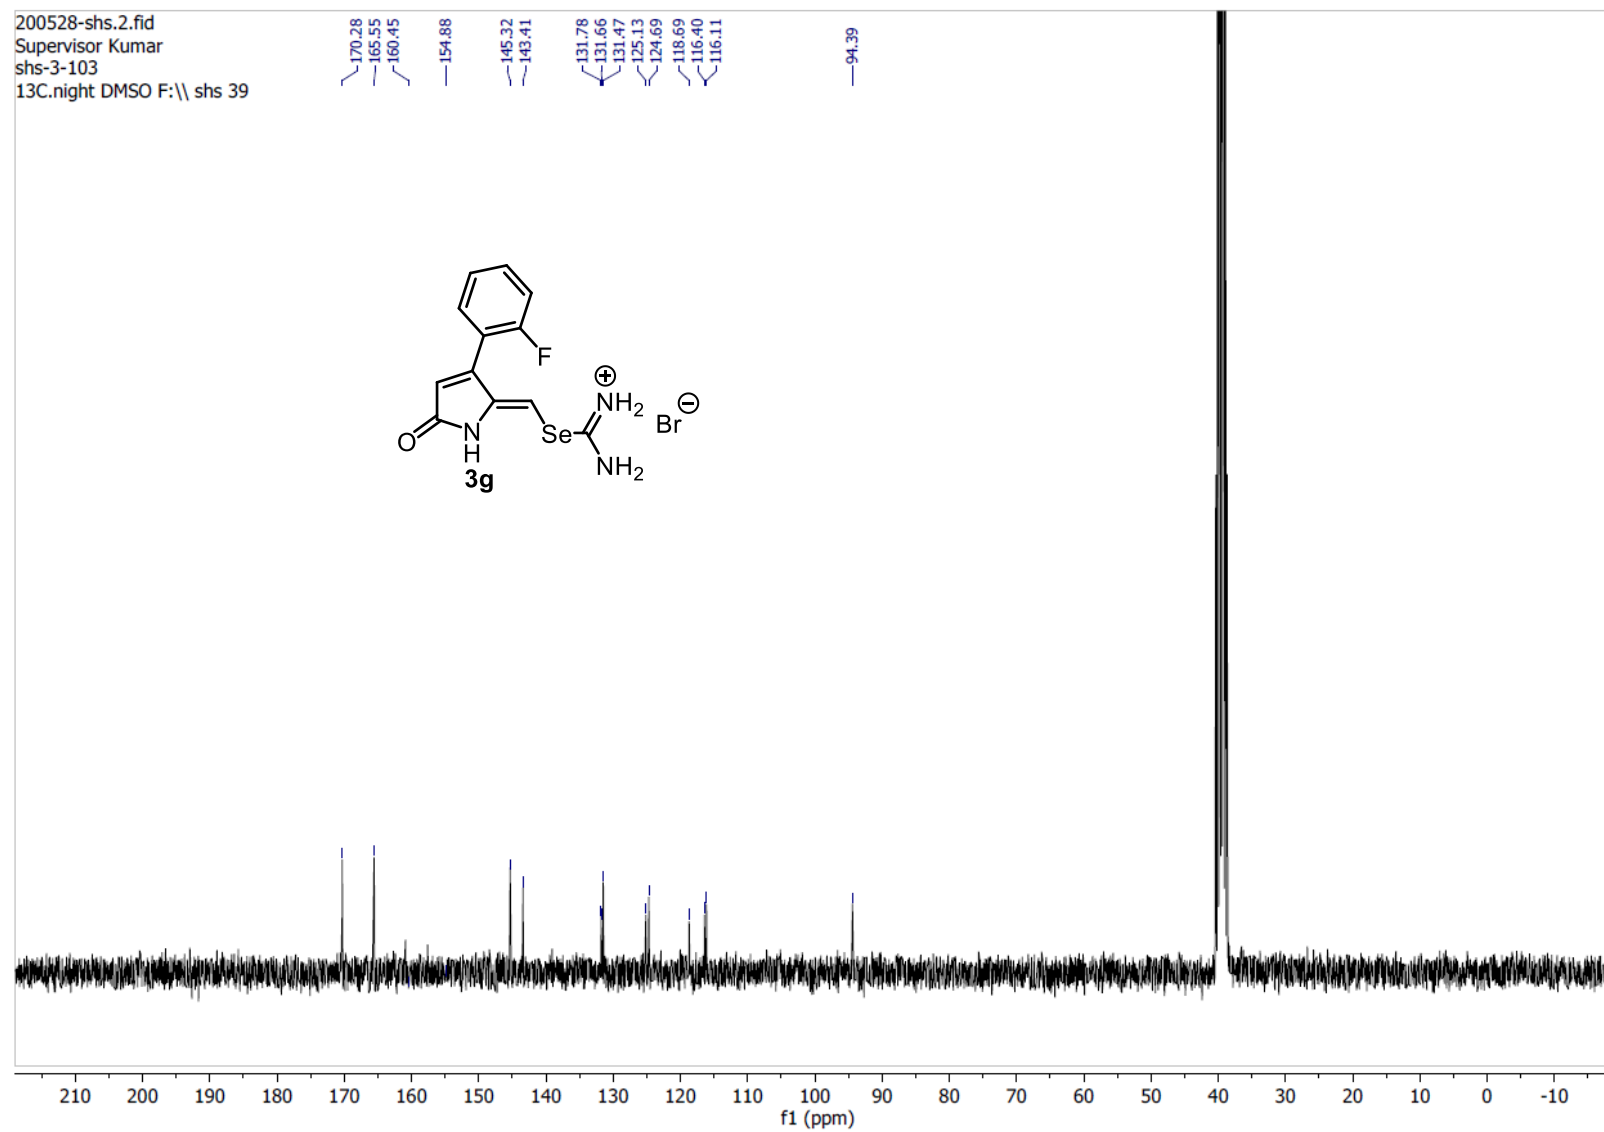



<sup>1</sup>H NMR spectrum of compound **3h**

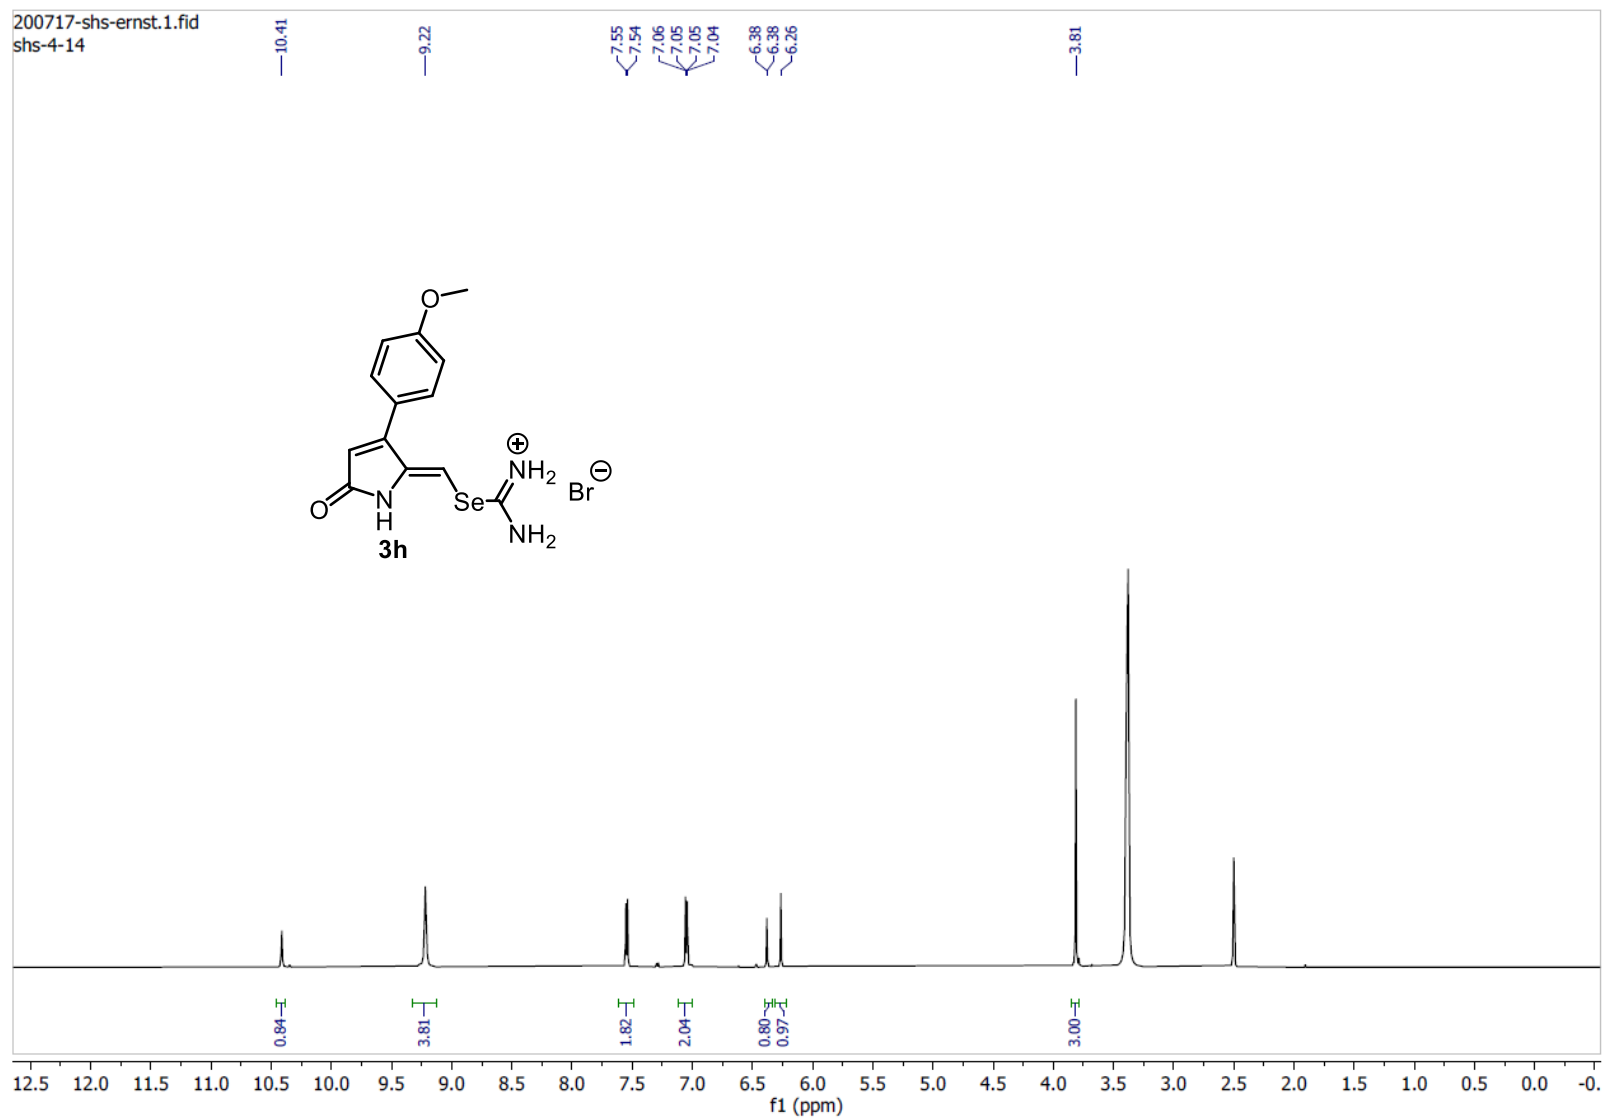

<sup>13</sup>C NMR spectrum of compound **3h**

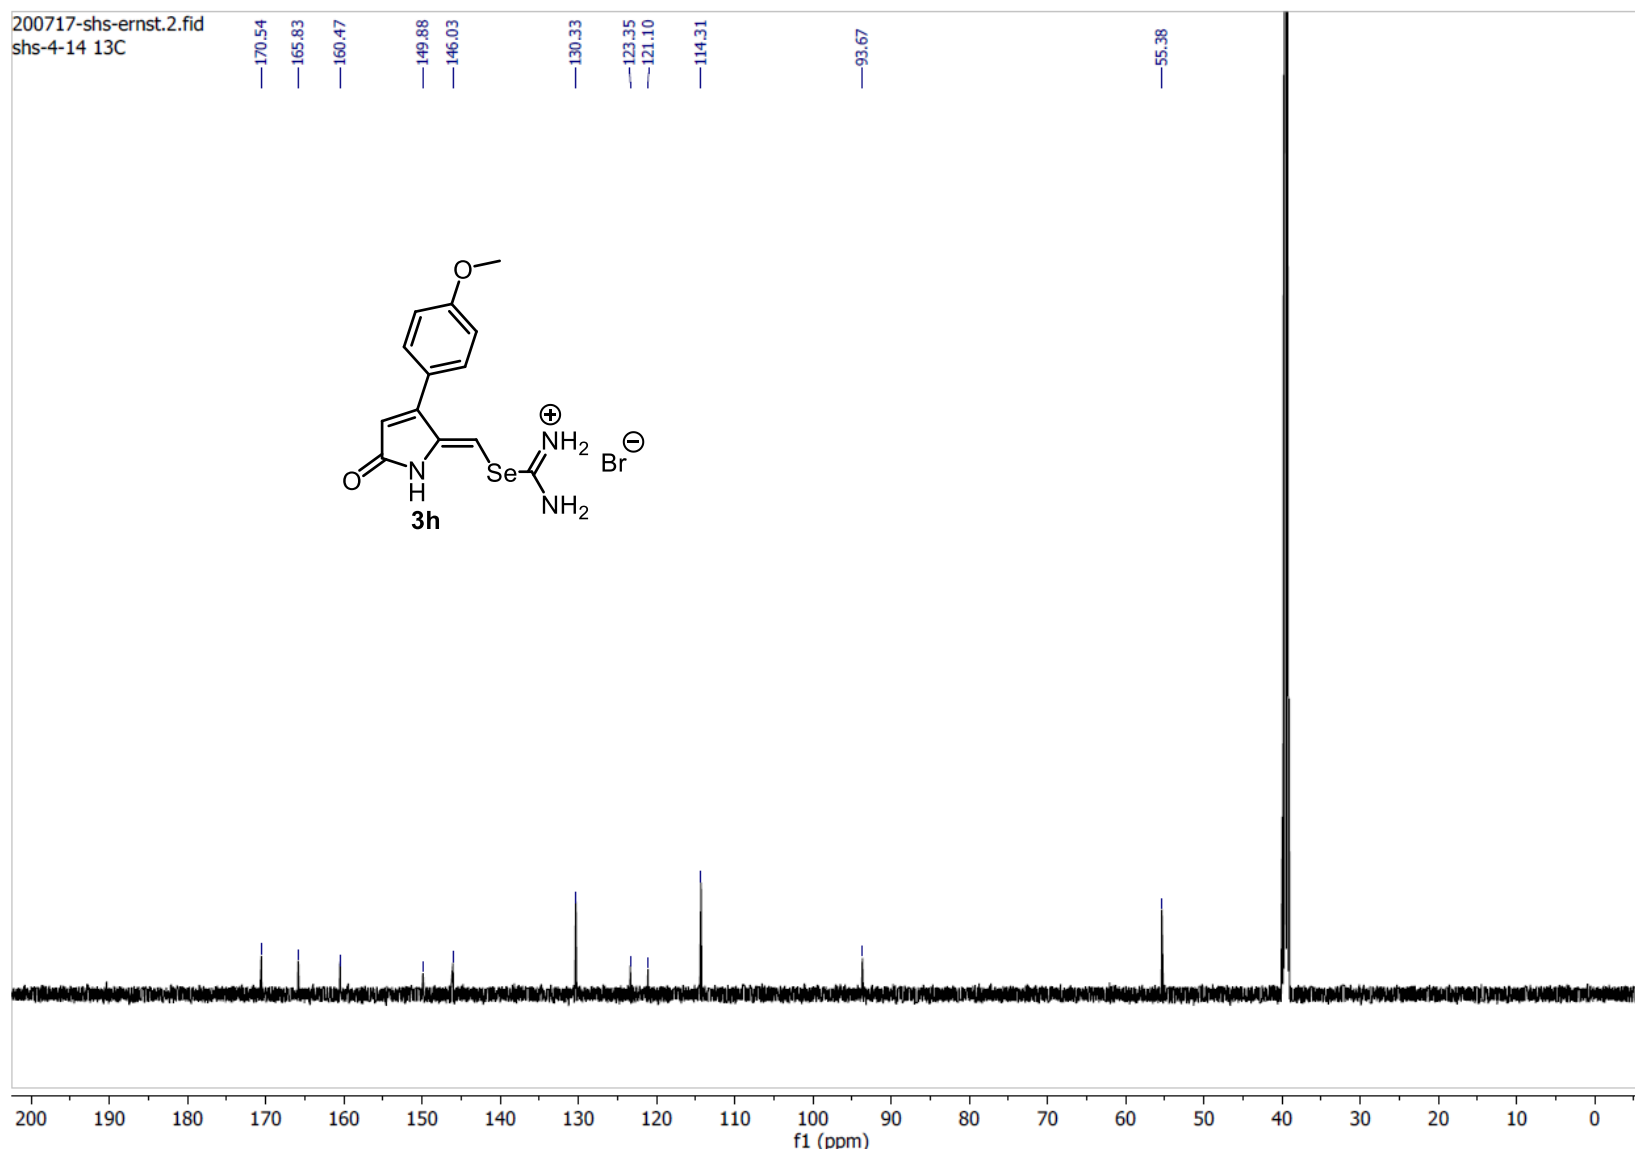

<sup>1</sup>H NMR spectrum of compound **4a**

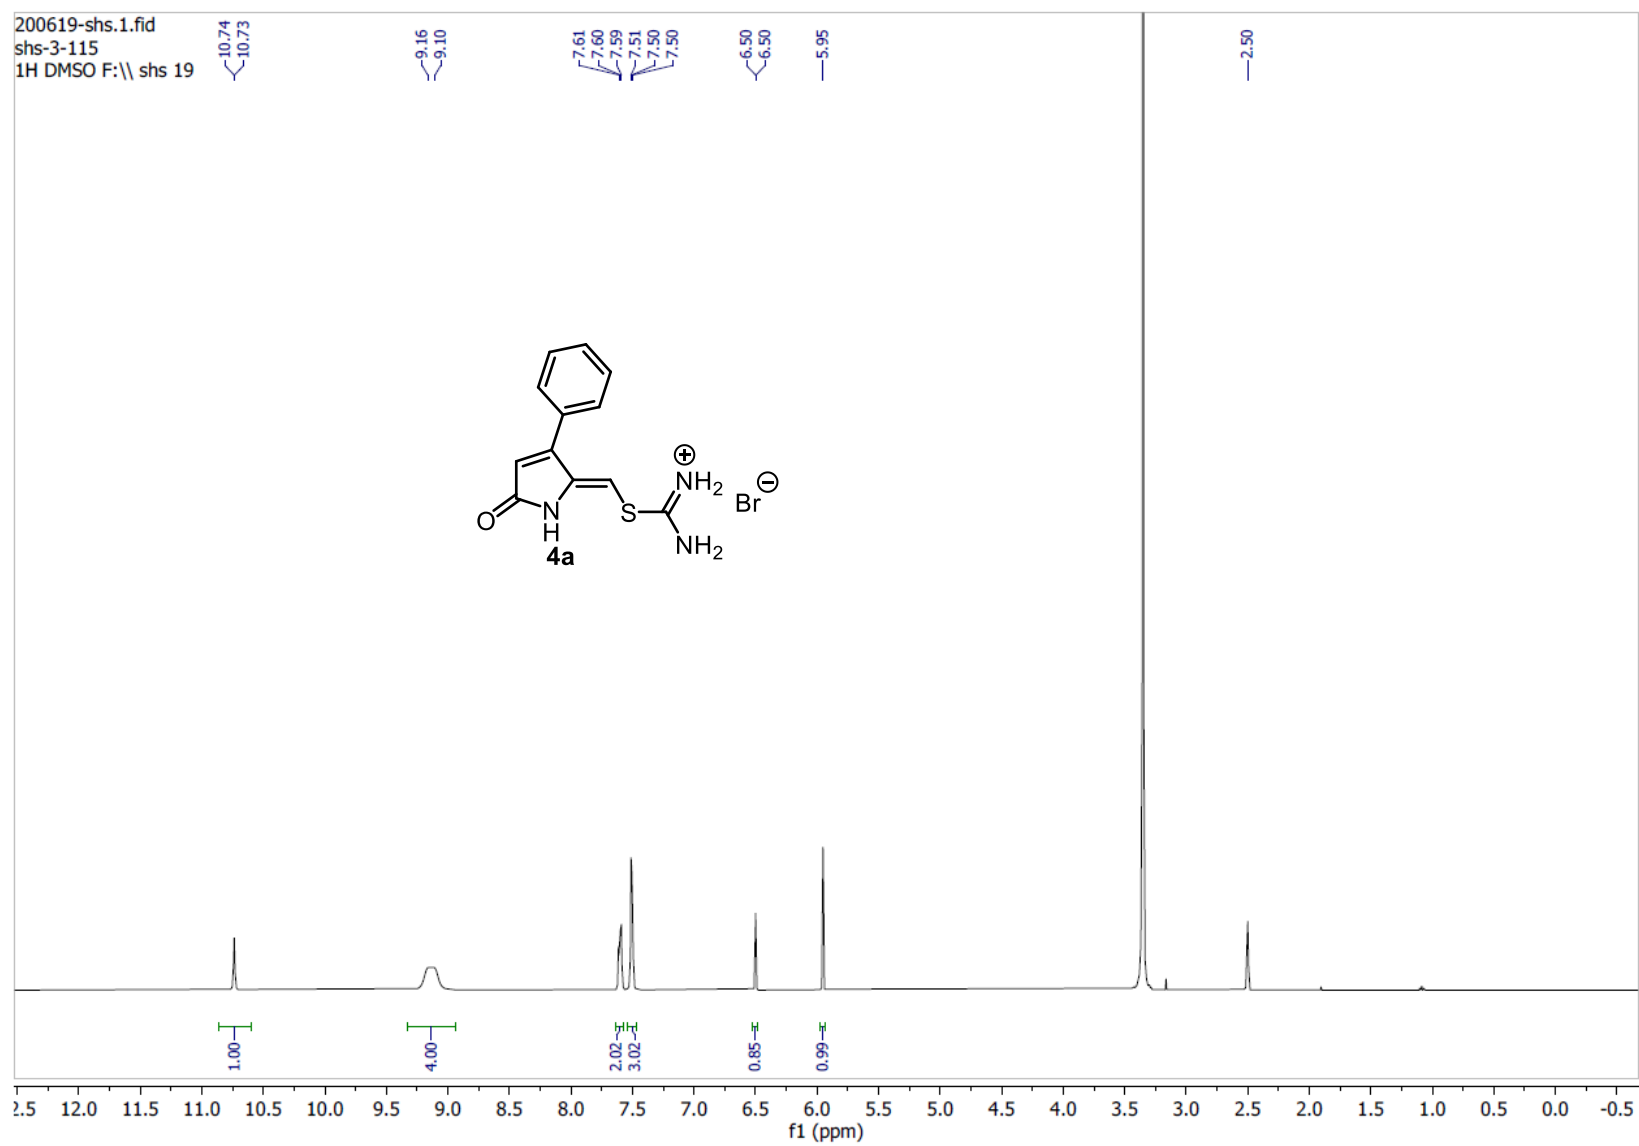

<sup>13</sup>C NMR spectrum of compound **4a**

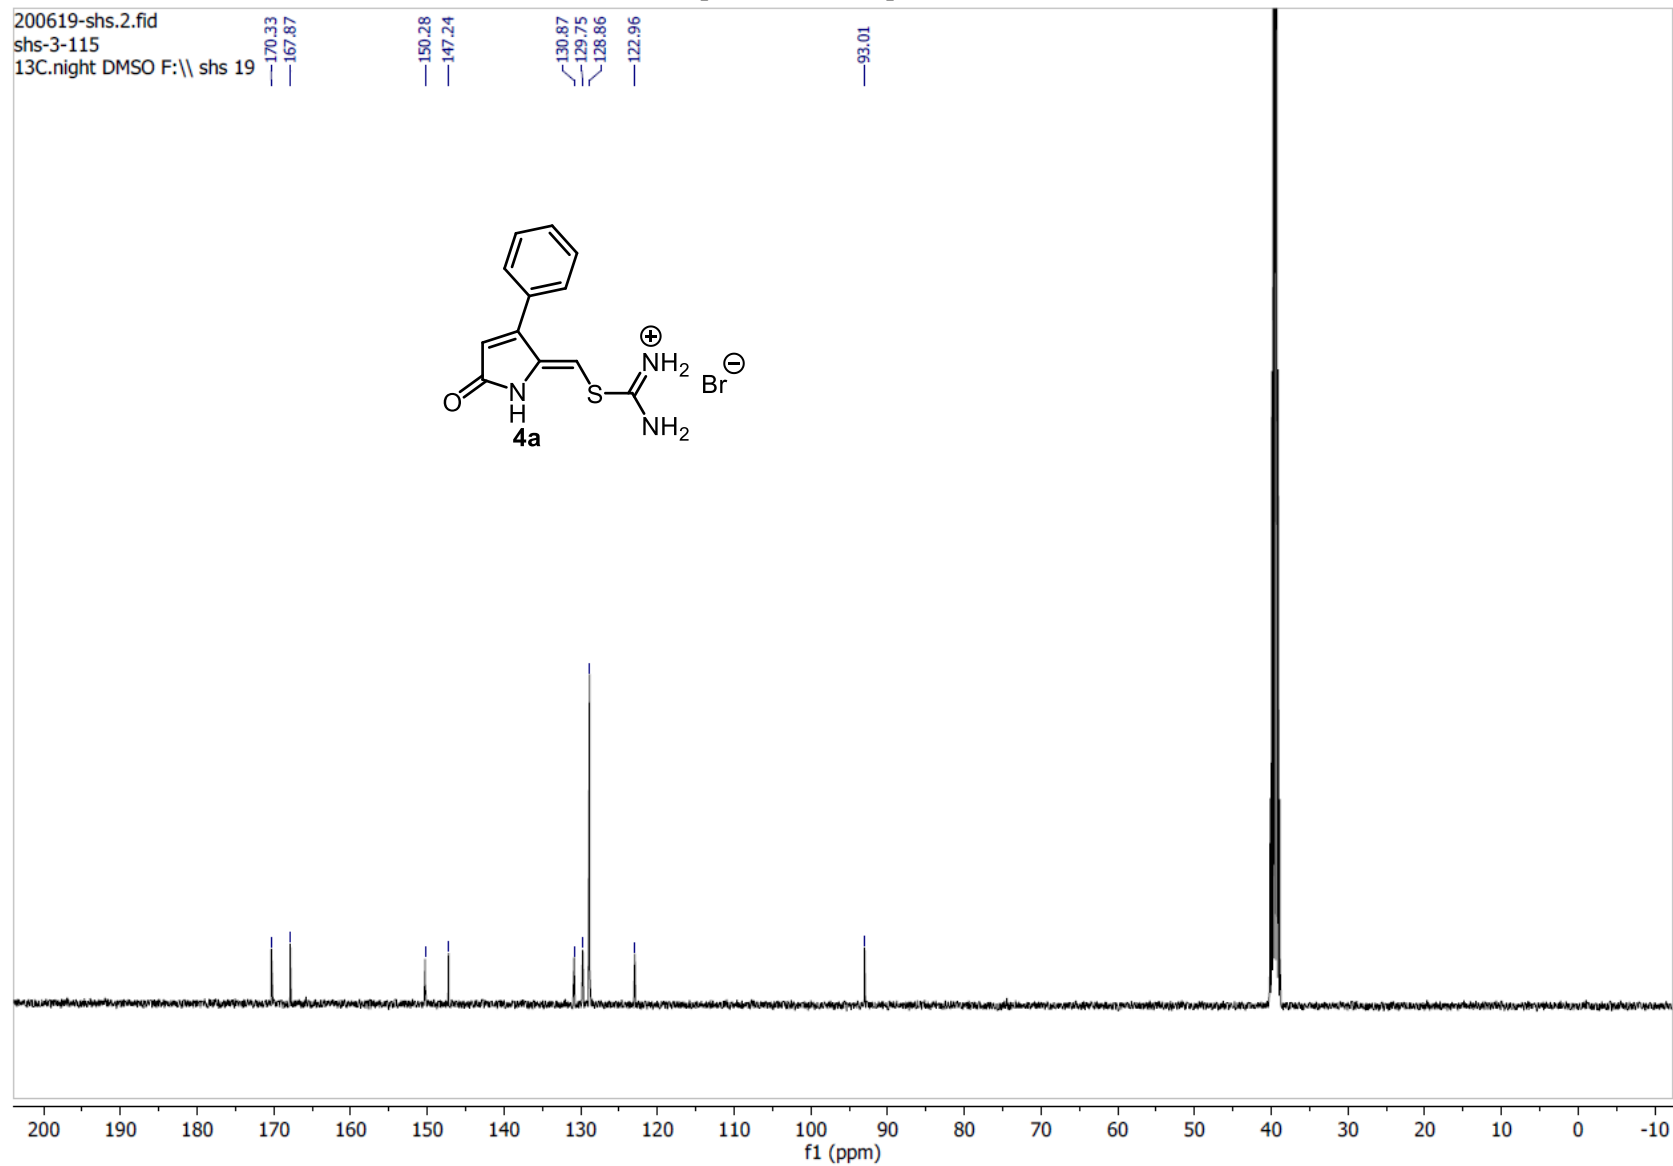

<sup>1</sup>H NMR spectrum of compound **4b**

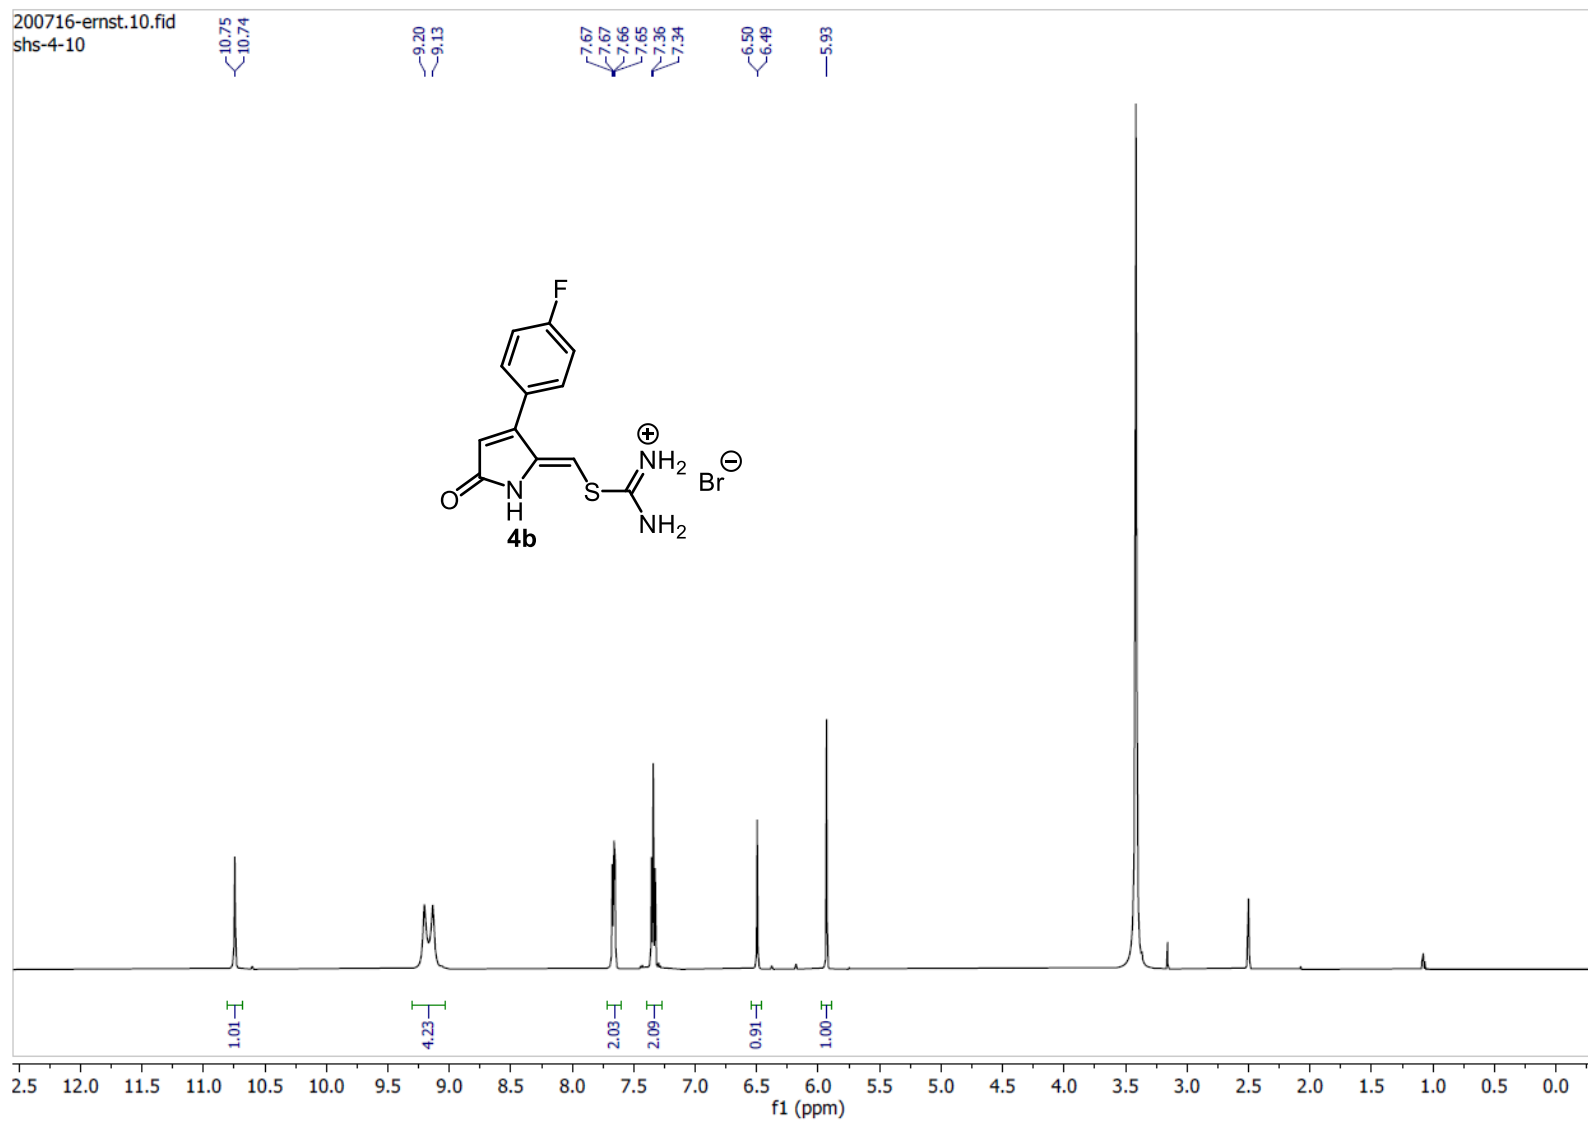

<sup>13</sup>C NMR spectrum of compound **4b**

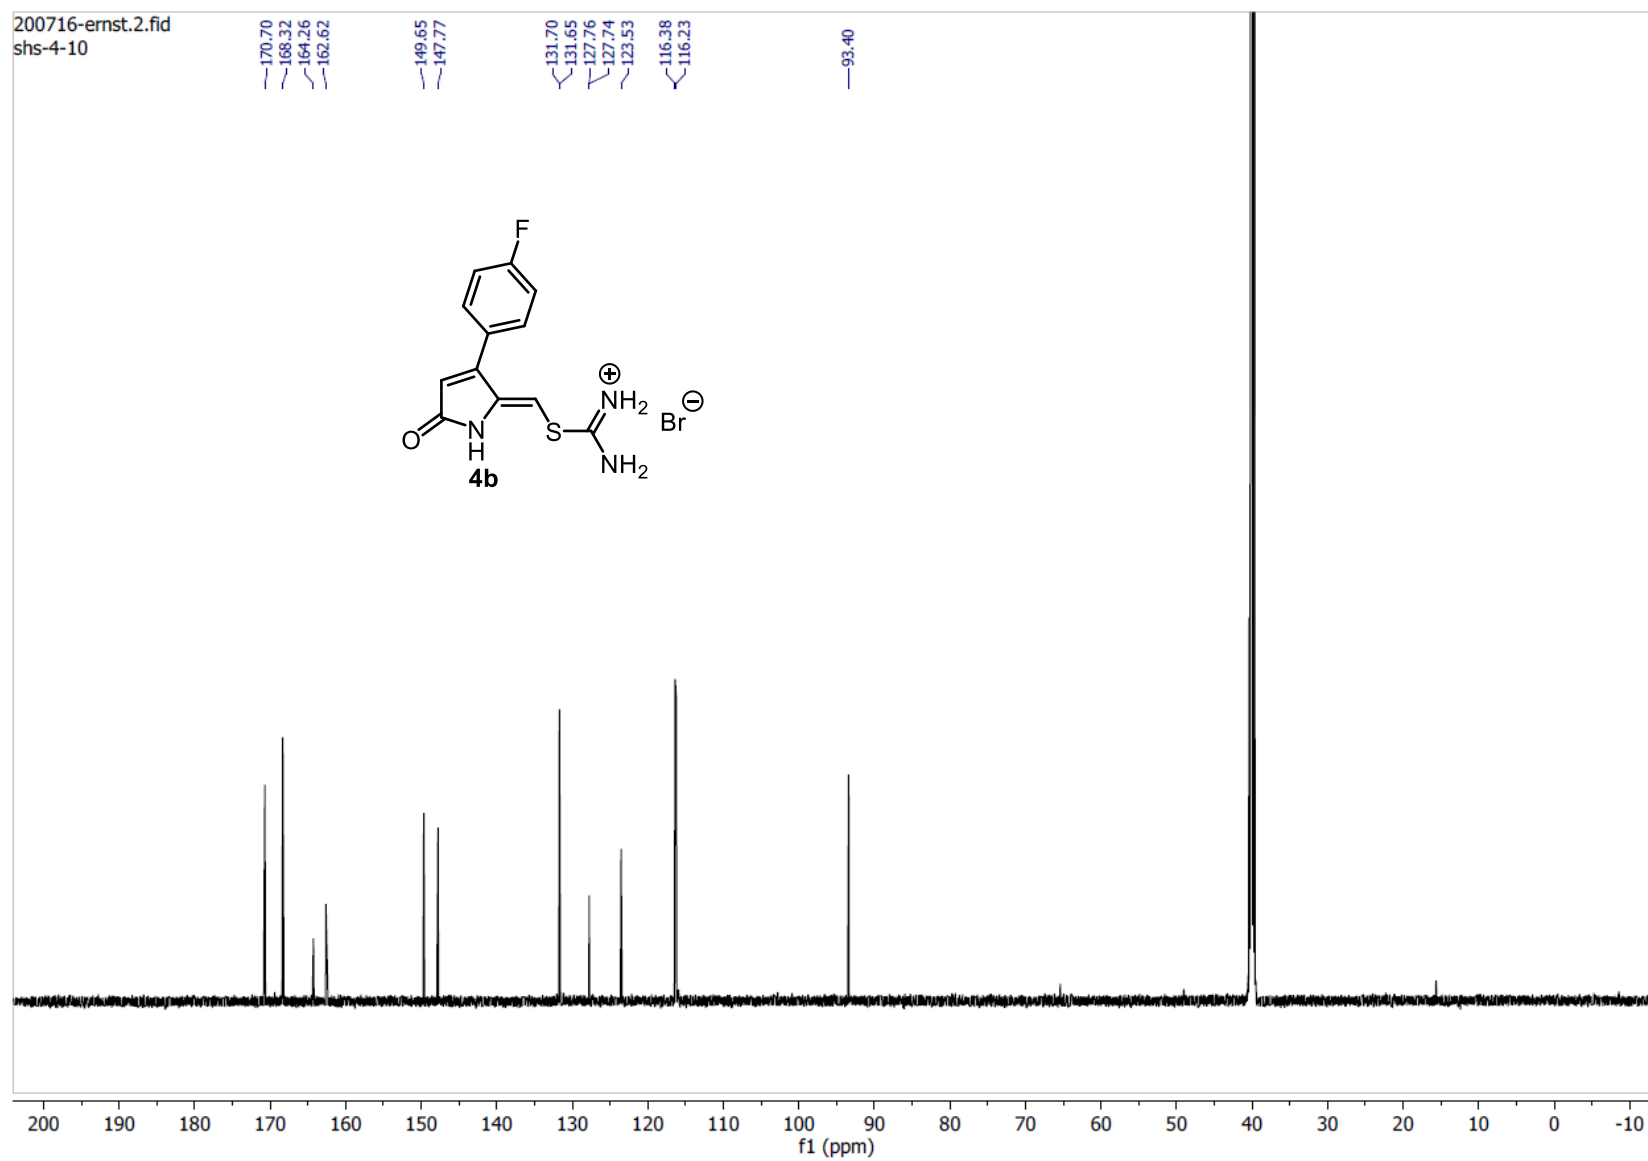

<sup>1</sup>H NMR spectrum of compound **4c**

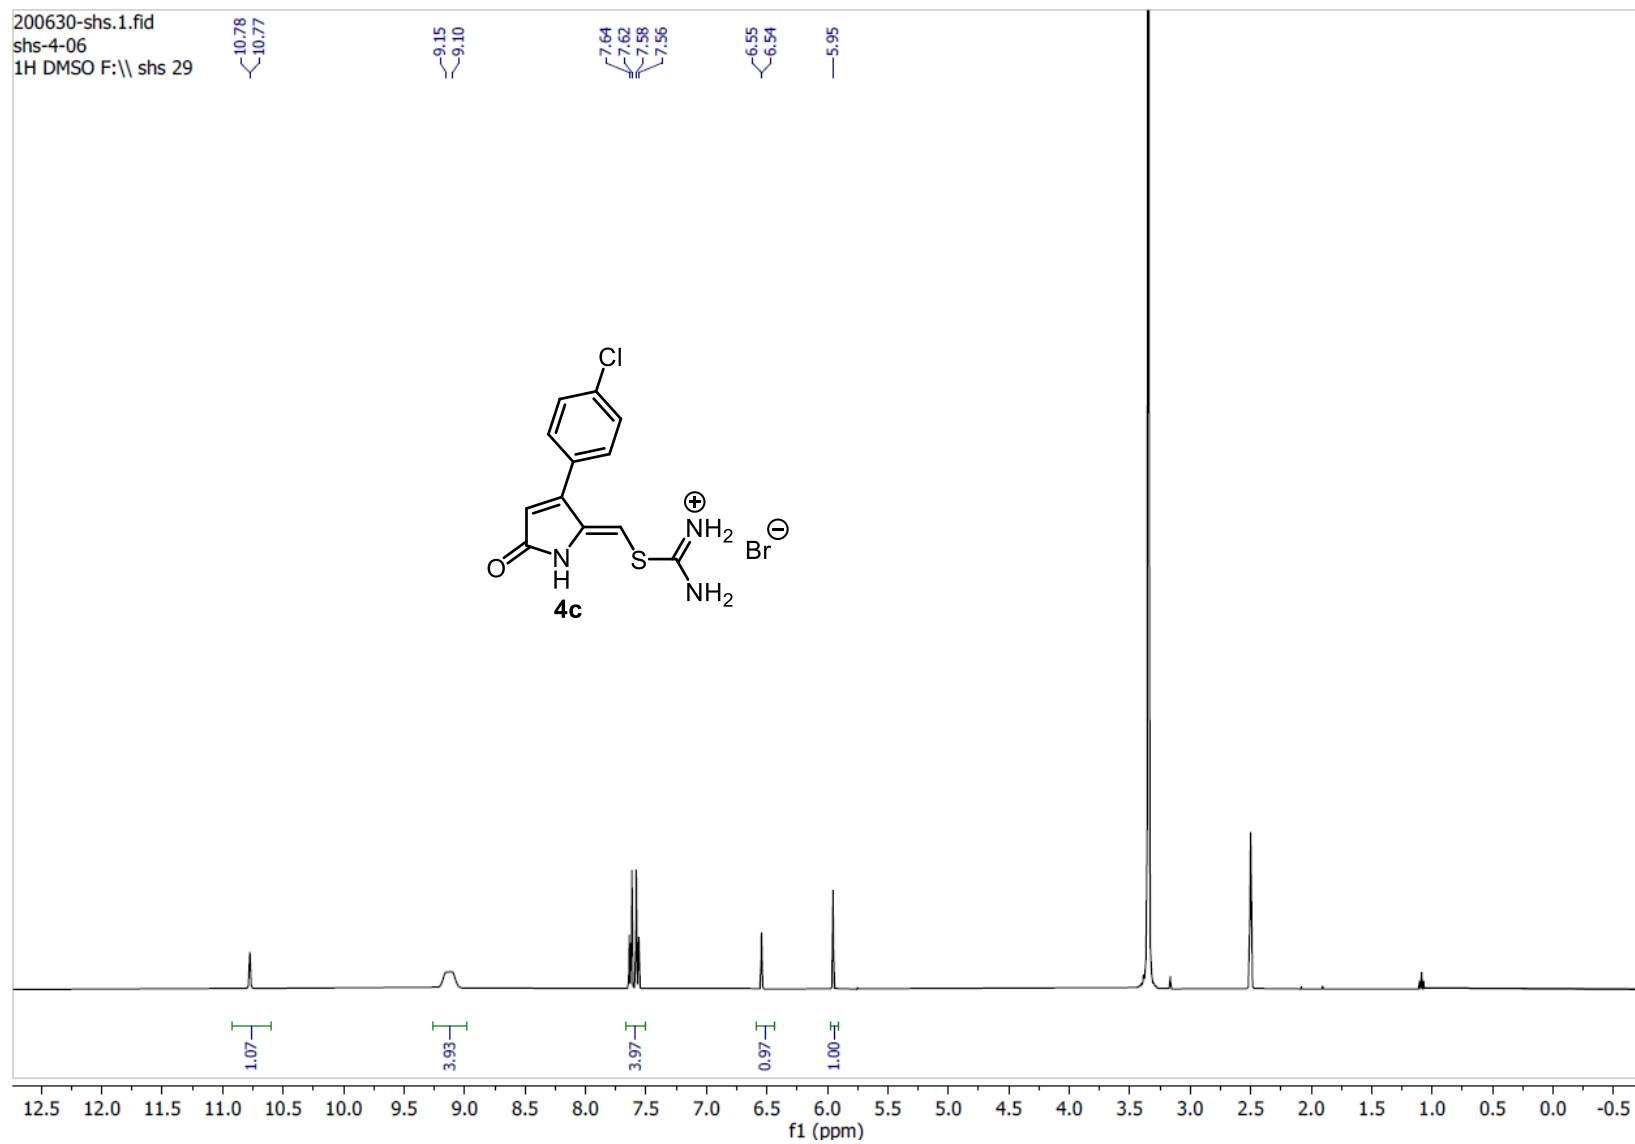

<sup>13</sup>C NMR spectrum of compound **4c**

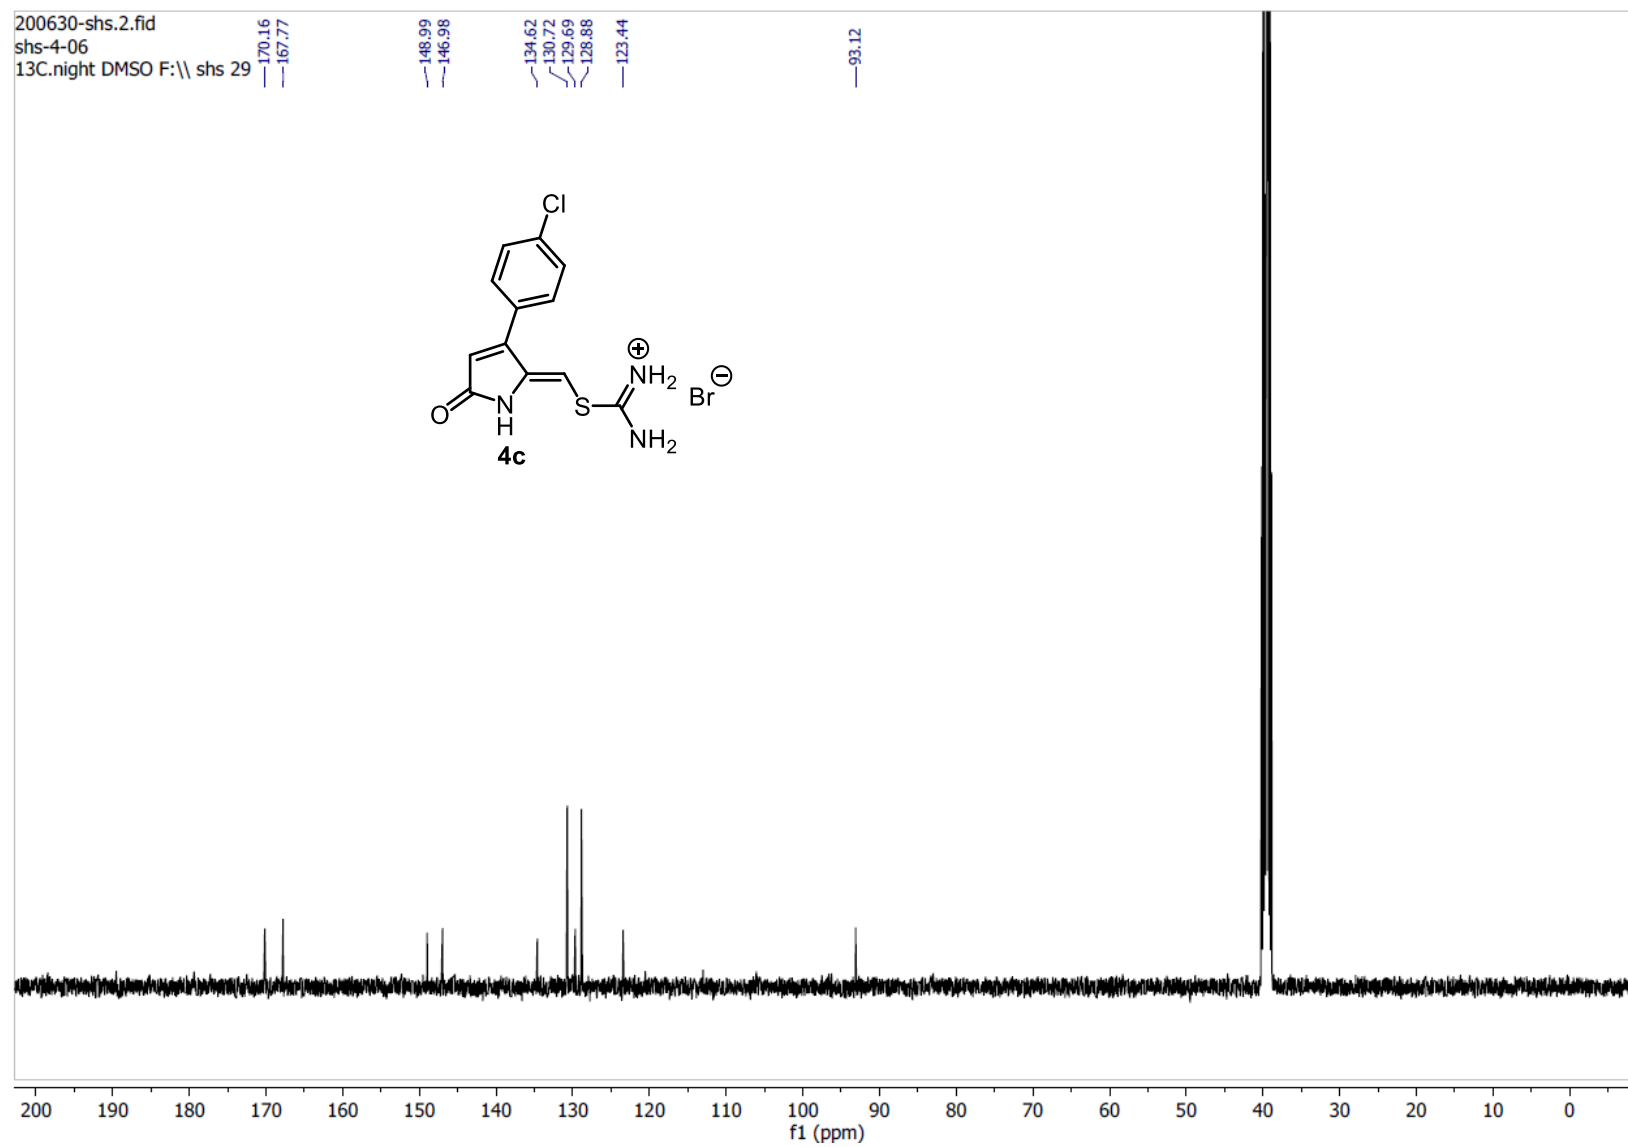



<sup>1</sup>H NMR spectrum of compound **4d**

200819-shs.1.fid  
Supervisor Kumar  
shs-4-29  
1H DMSO F:\ shs 33

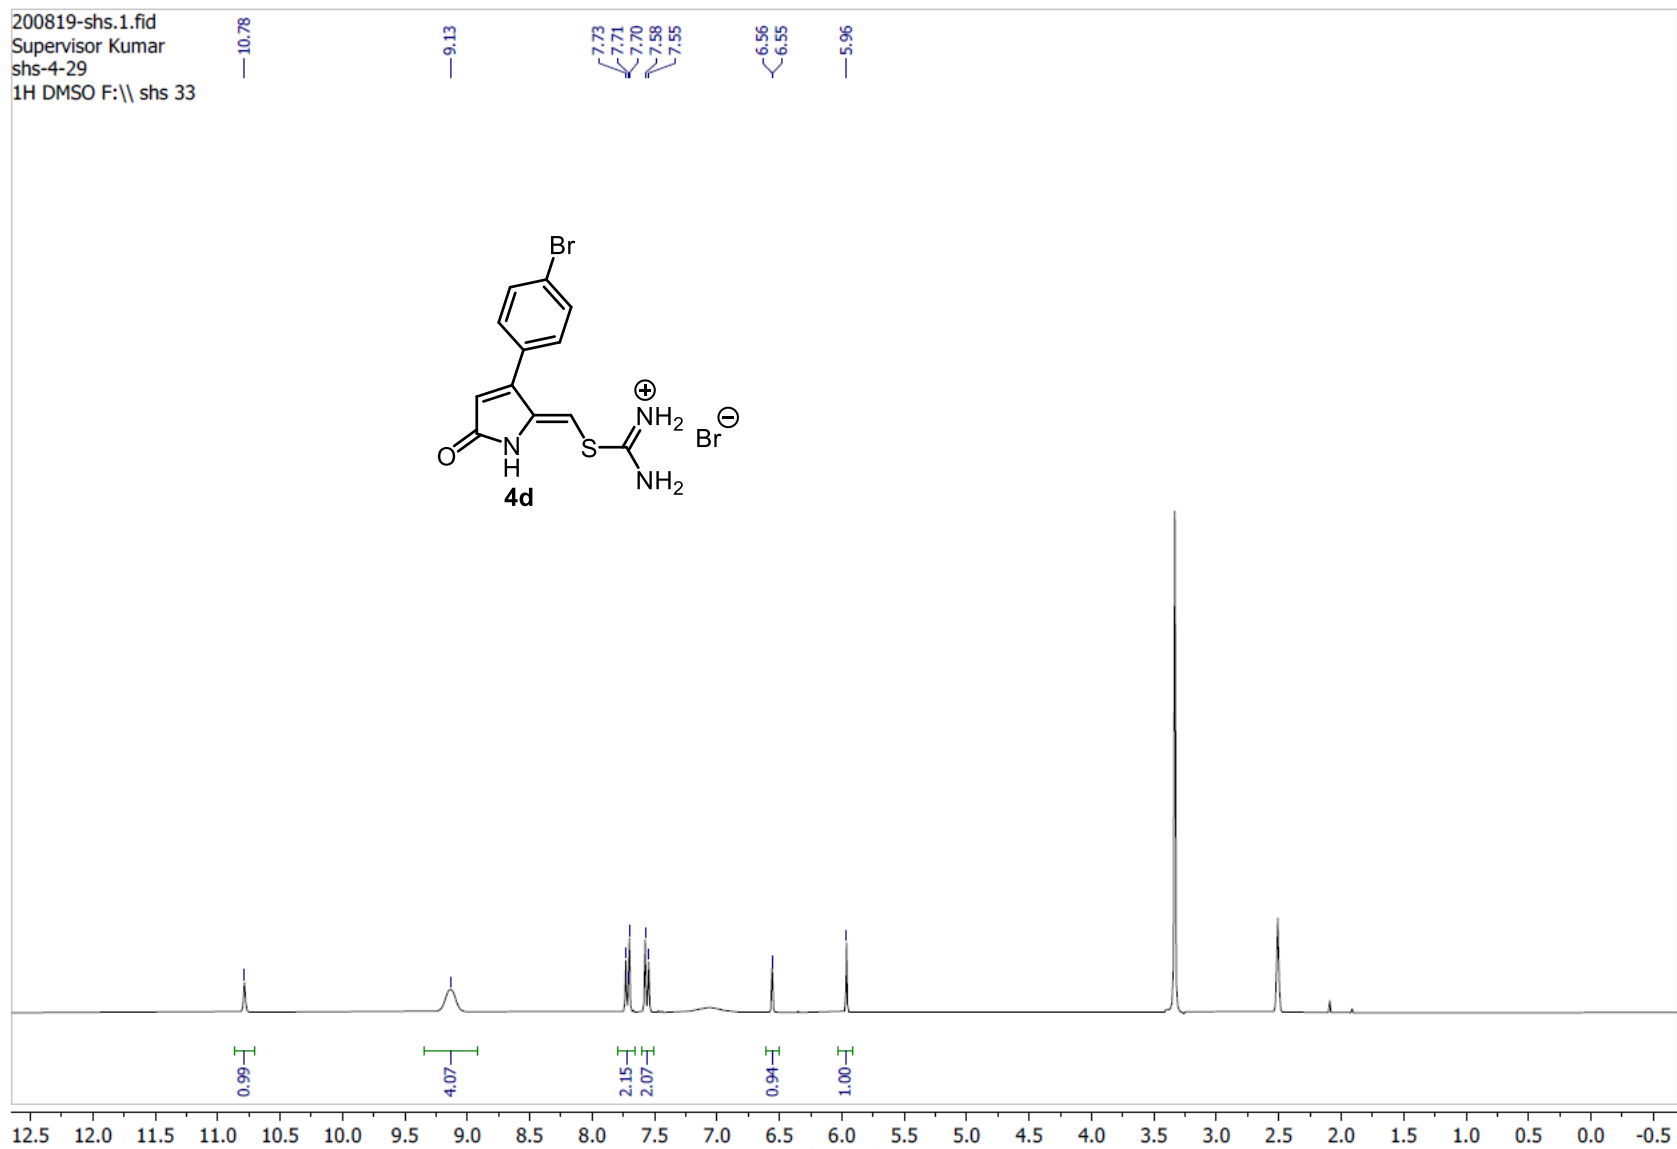

<sup>13</sup>C NMR spectrum of compound **4d**

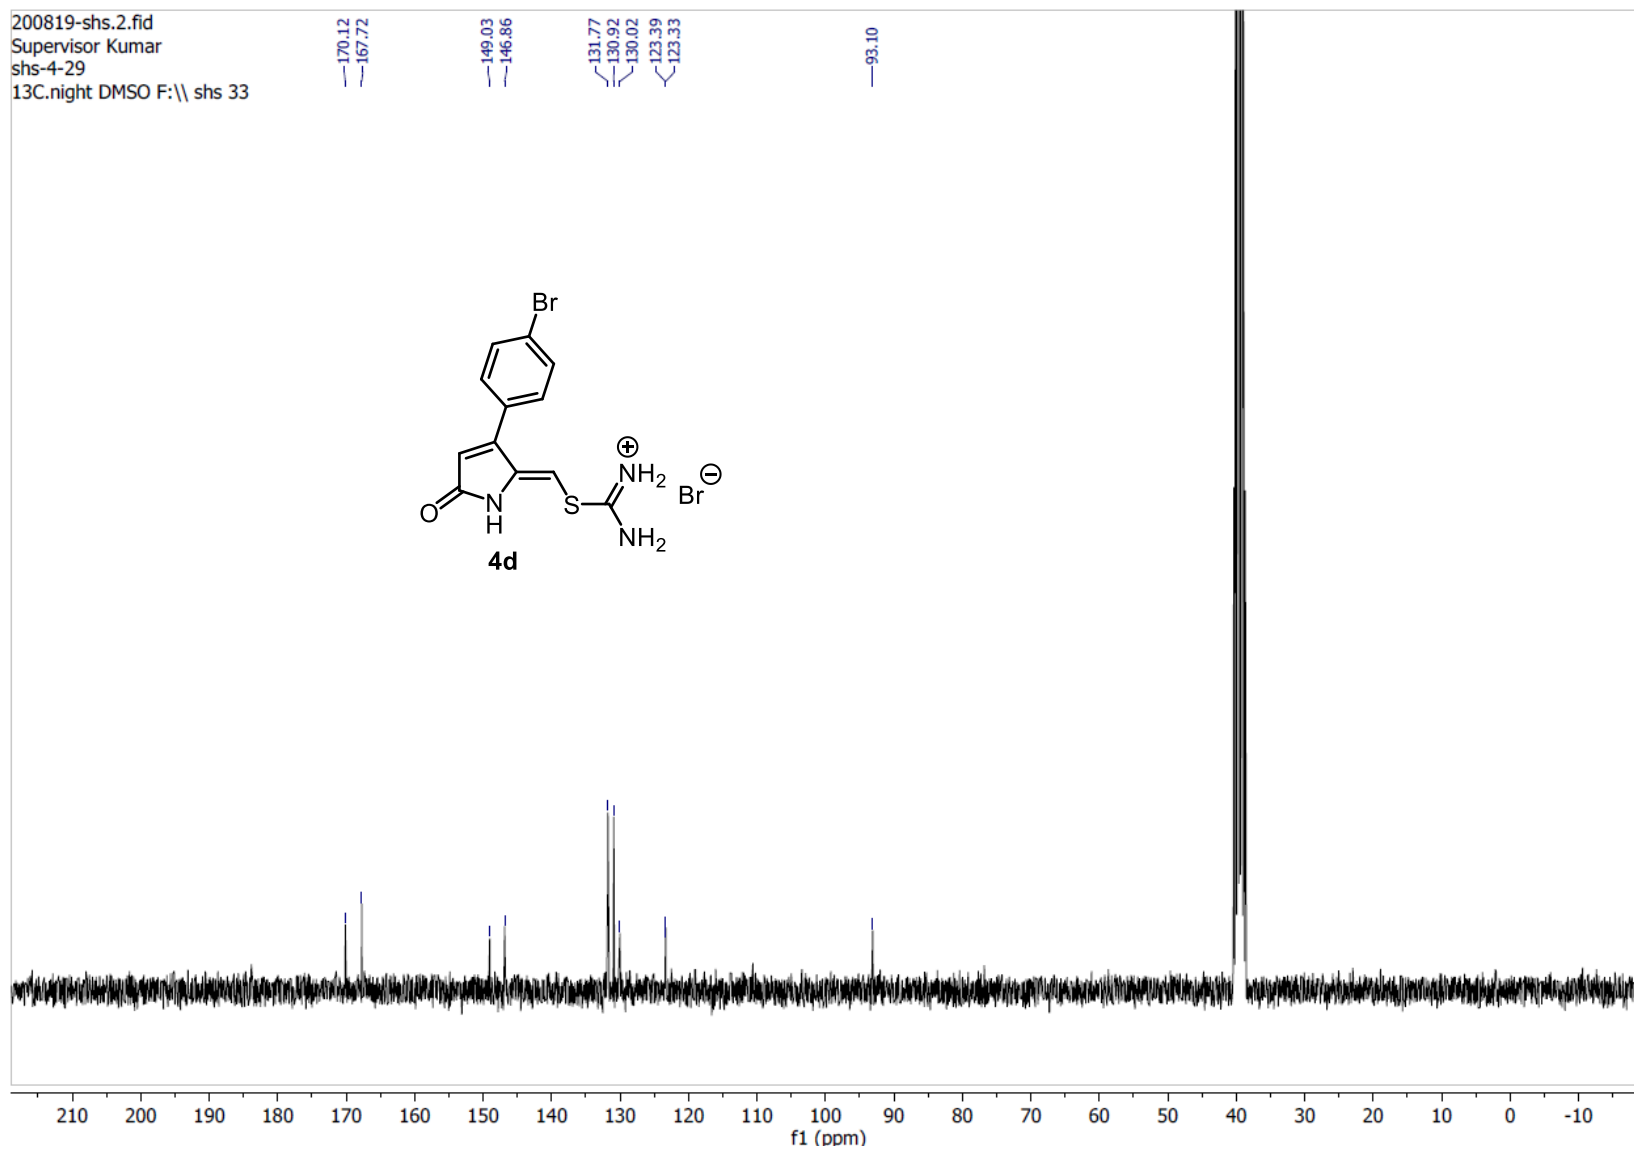

<sup>1</sup>H NMR spectrum of compound **4e**

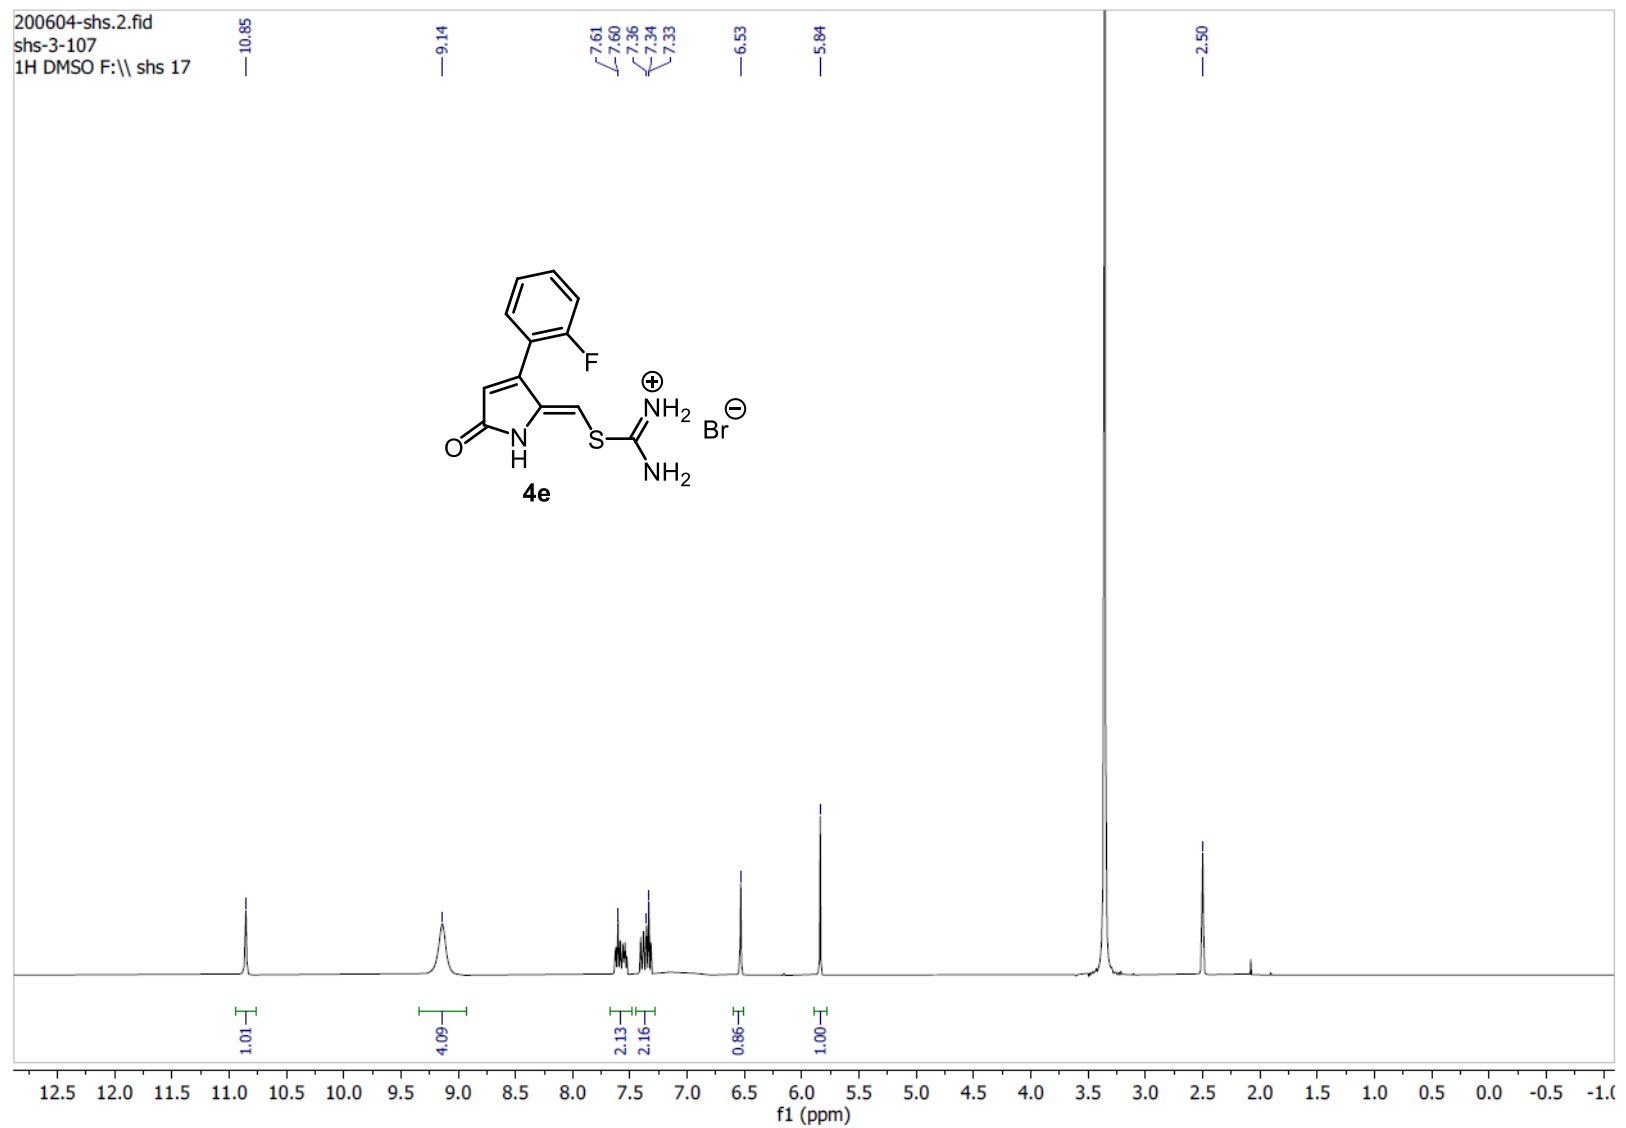

<sup>13</sup>C NMR spectrum of compound **4e**

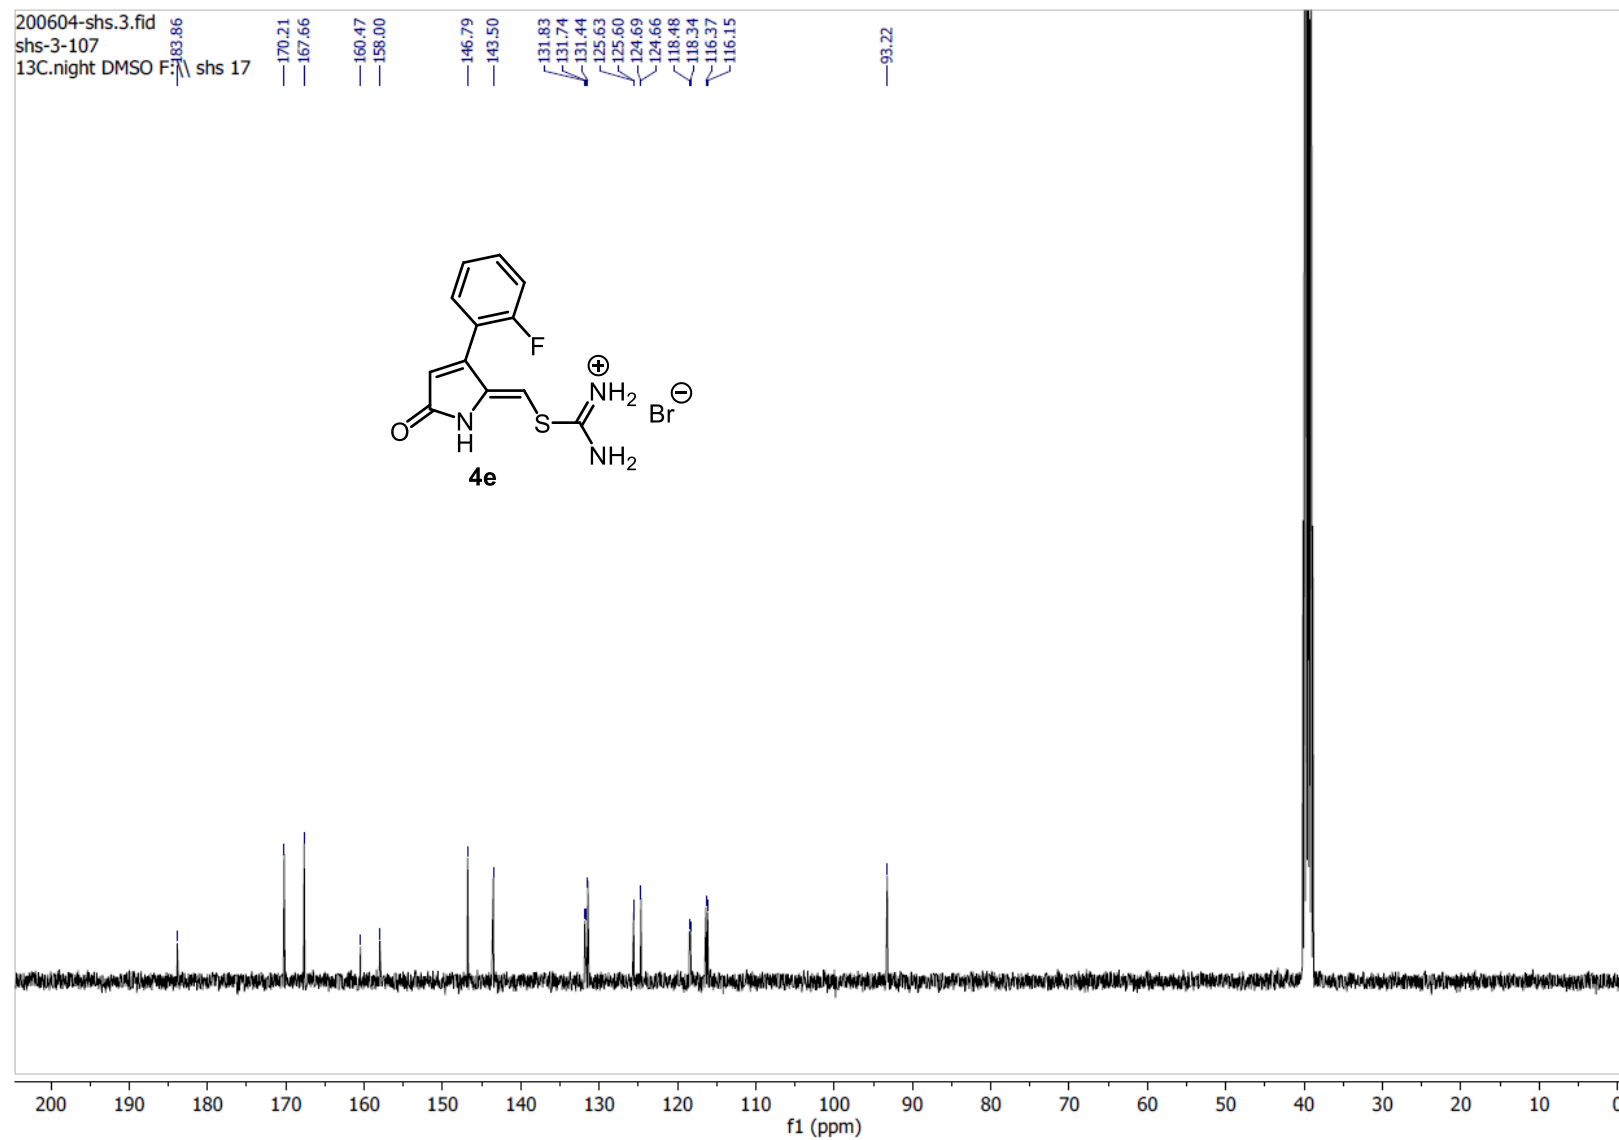

<sup>1</sup>H NMR spectrum of compound **4f**

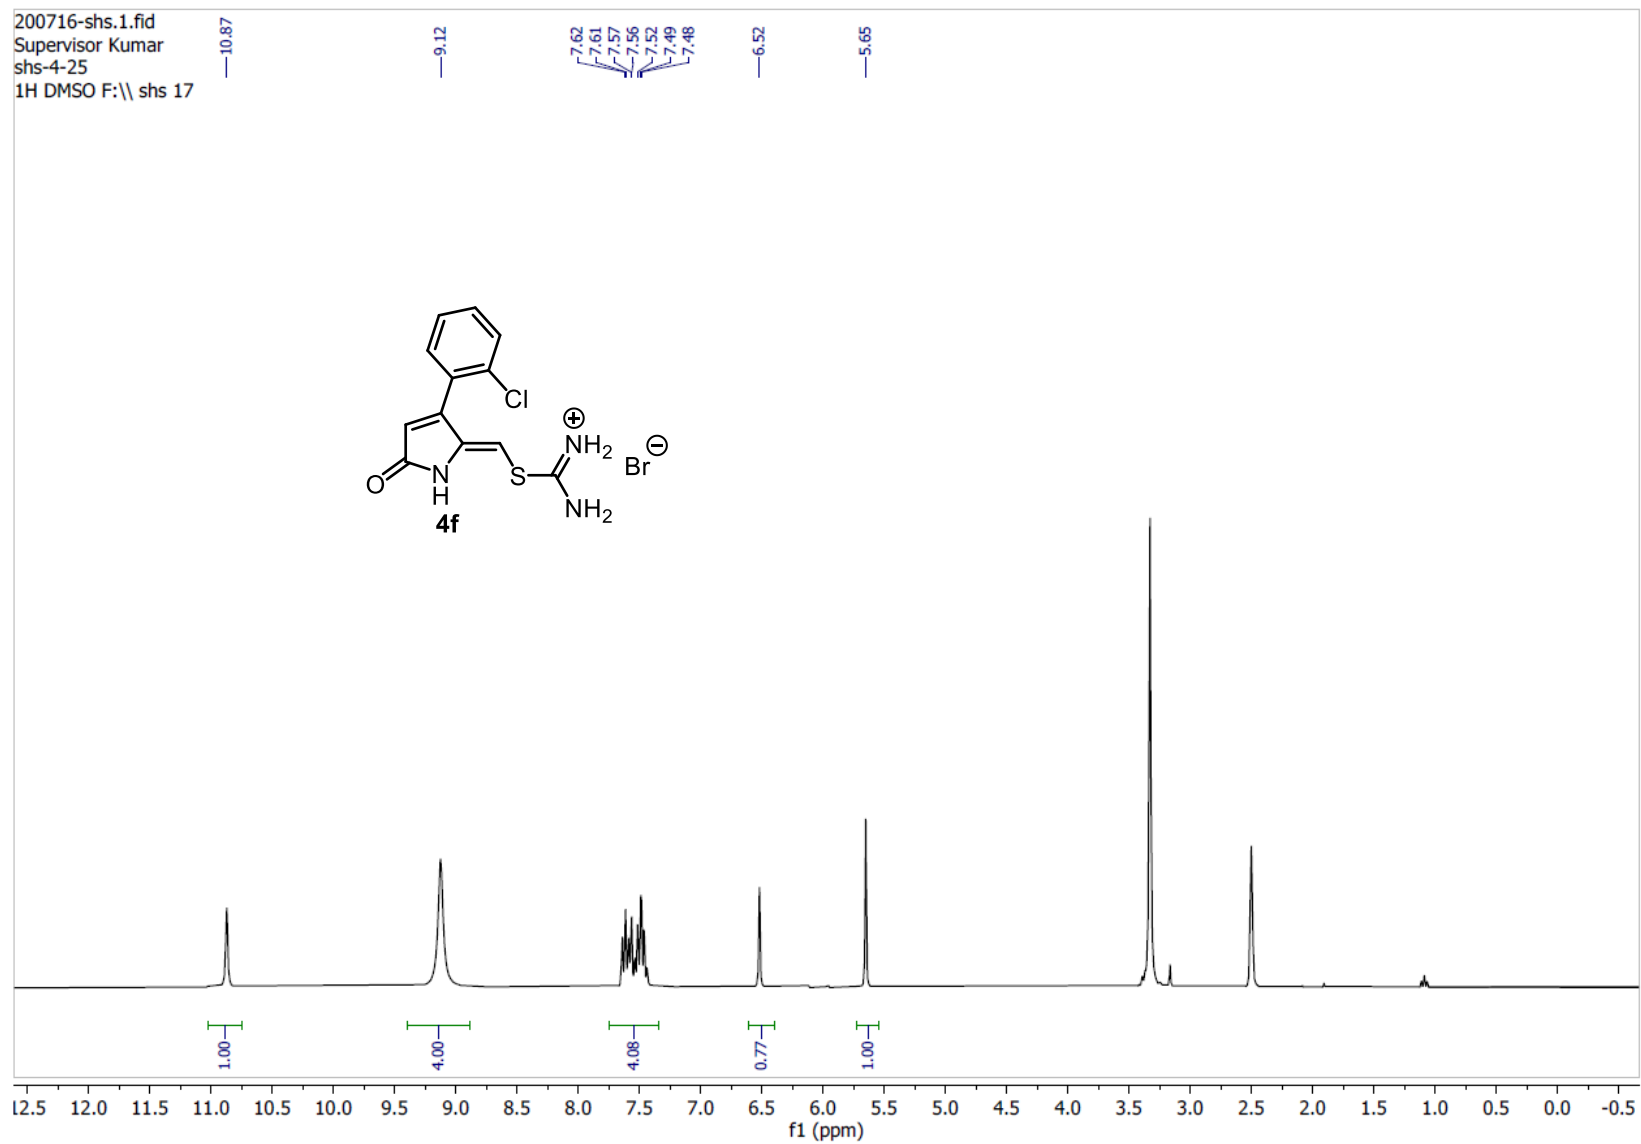

<sup>13</sup>C NMR spectrum of compound **4f**

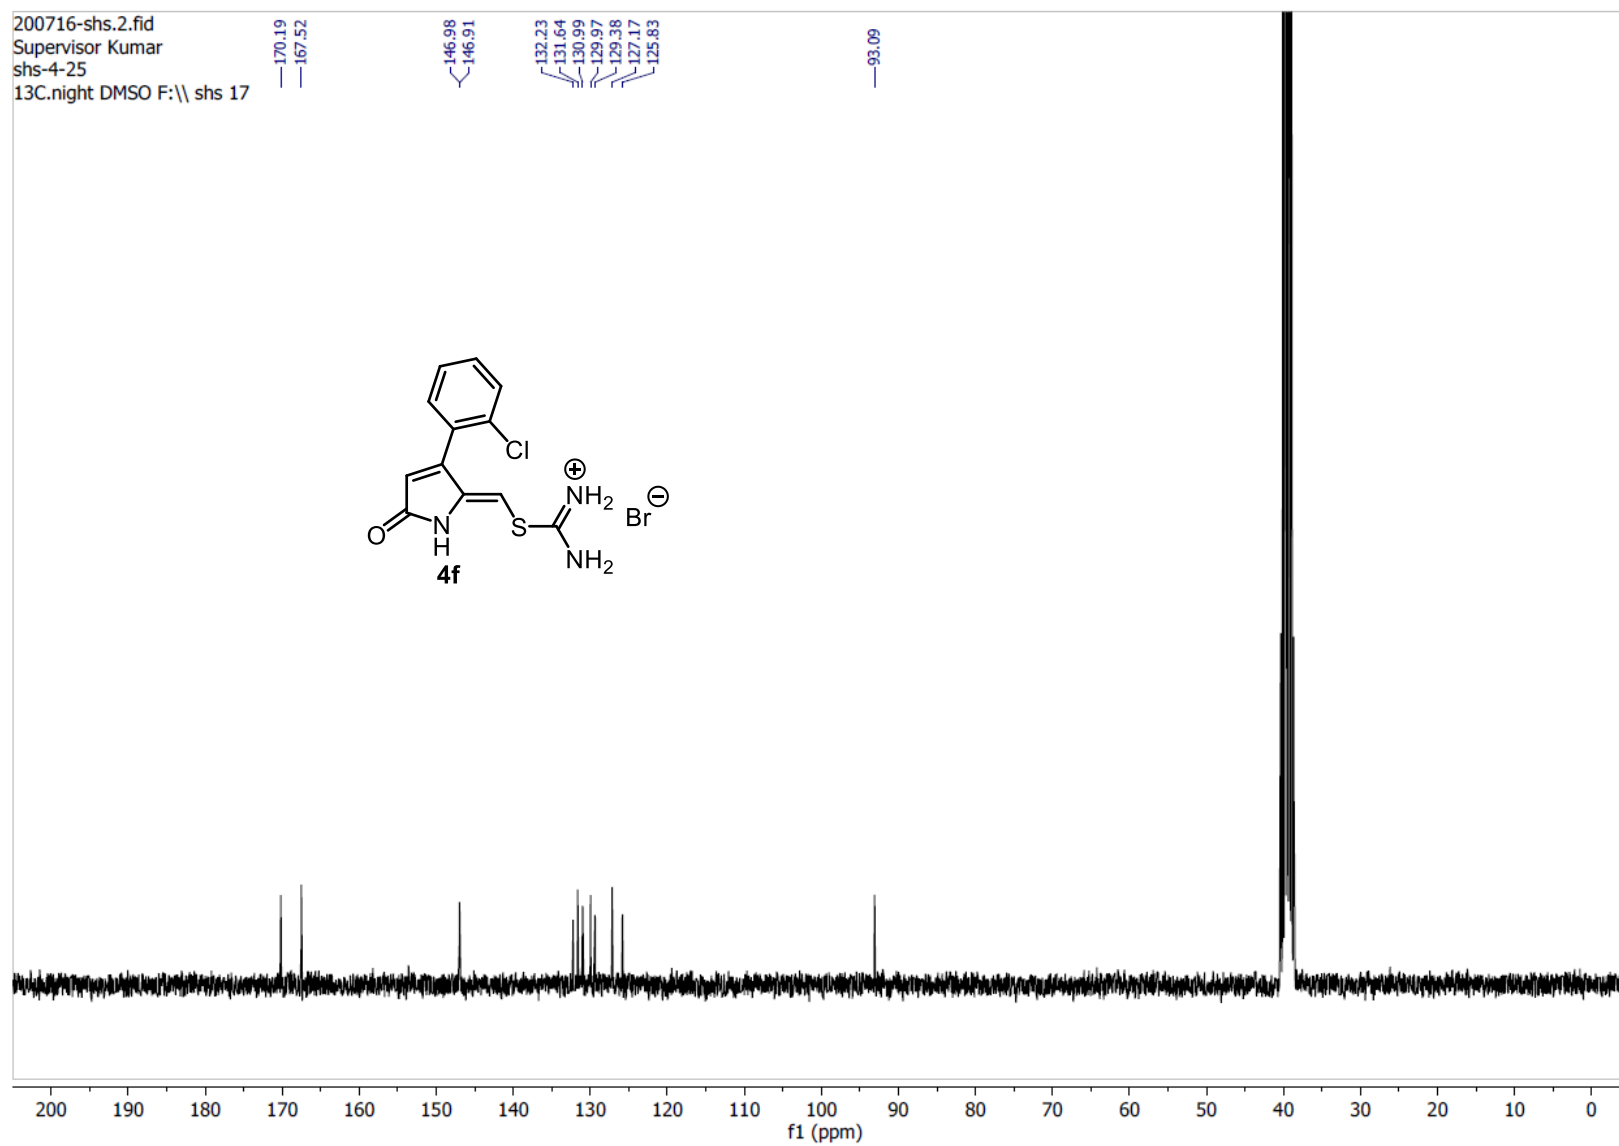

<sup>1</sup>H NMR spectrum of compound **4g**

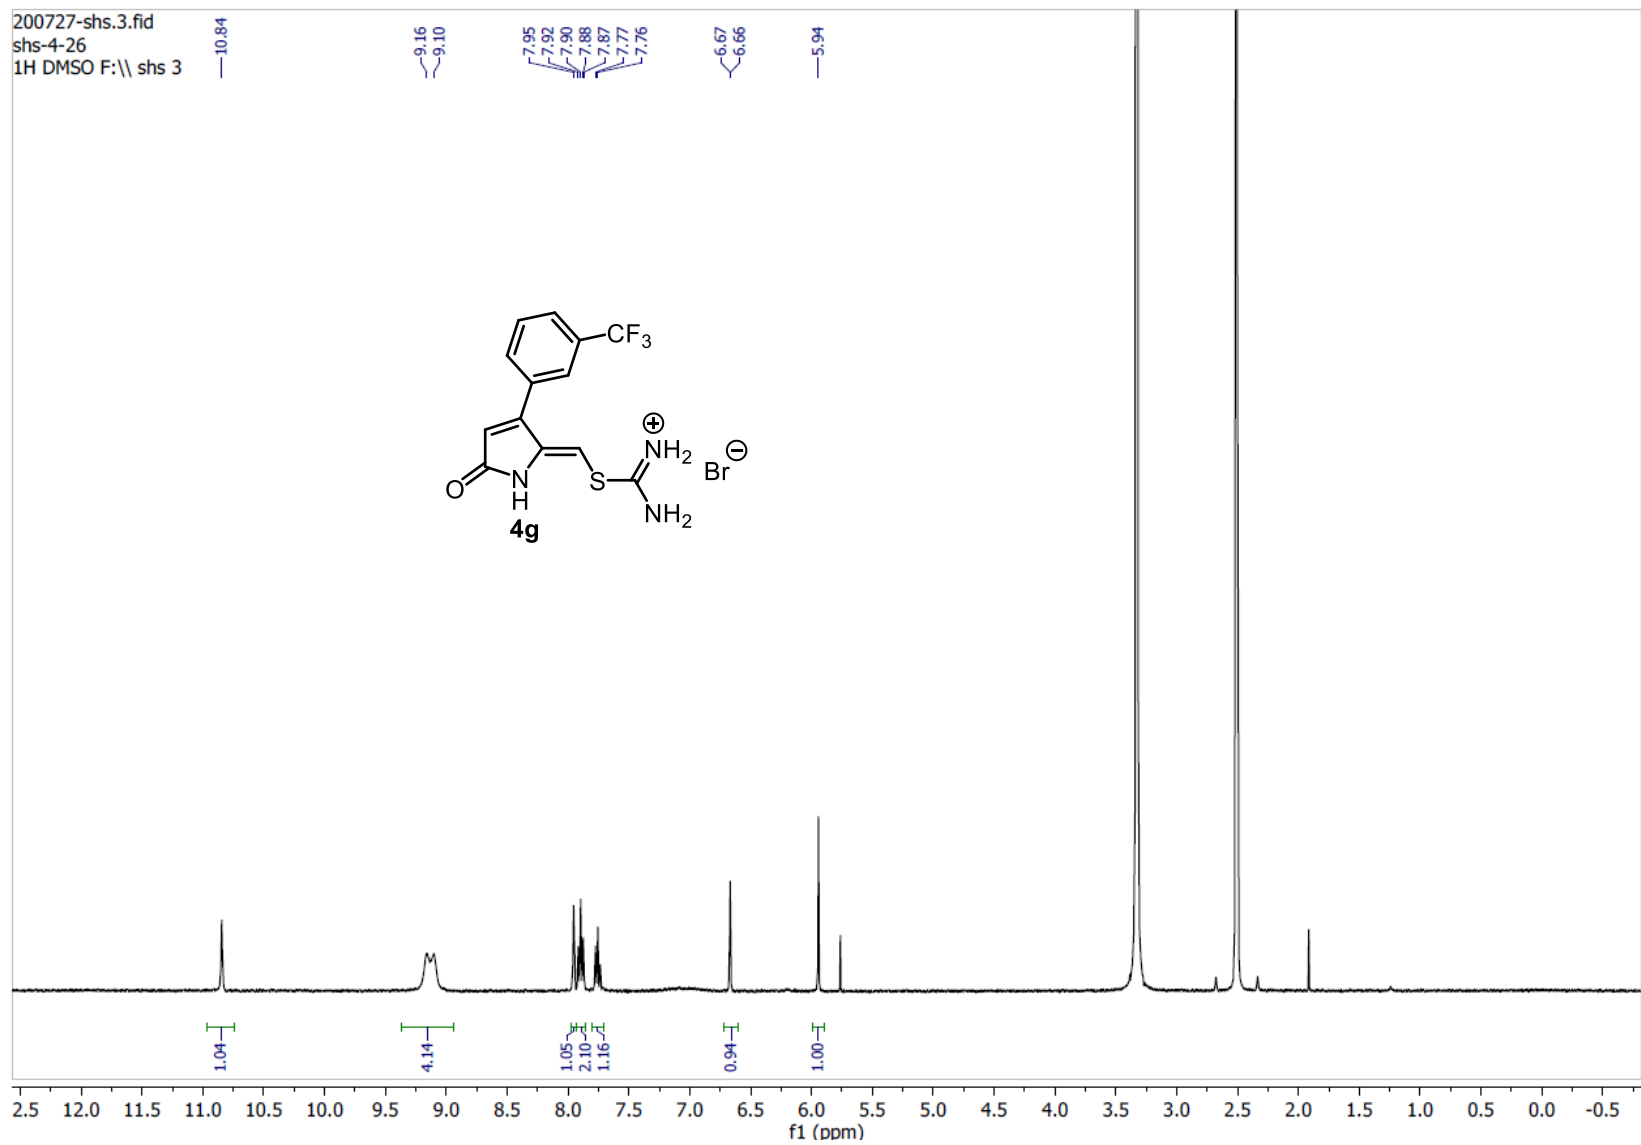

<sup>13</sup>C NMR spectrum of compound **4g**

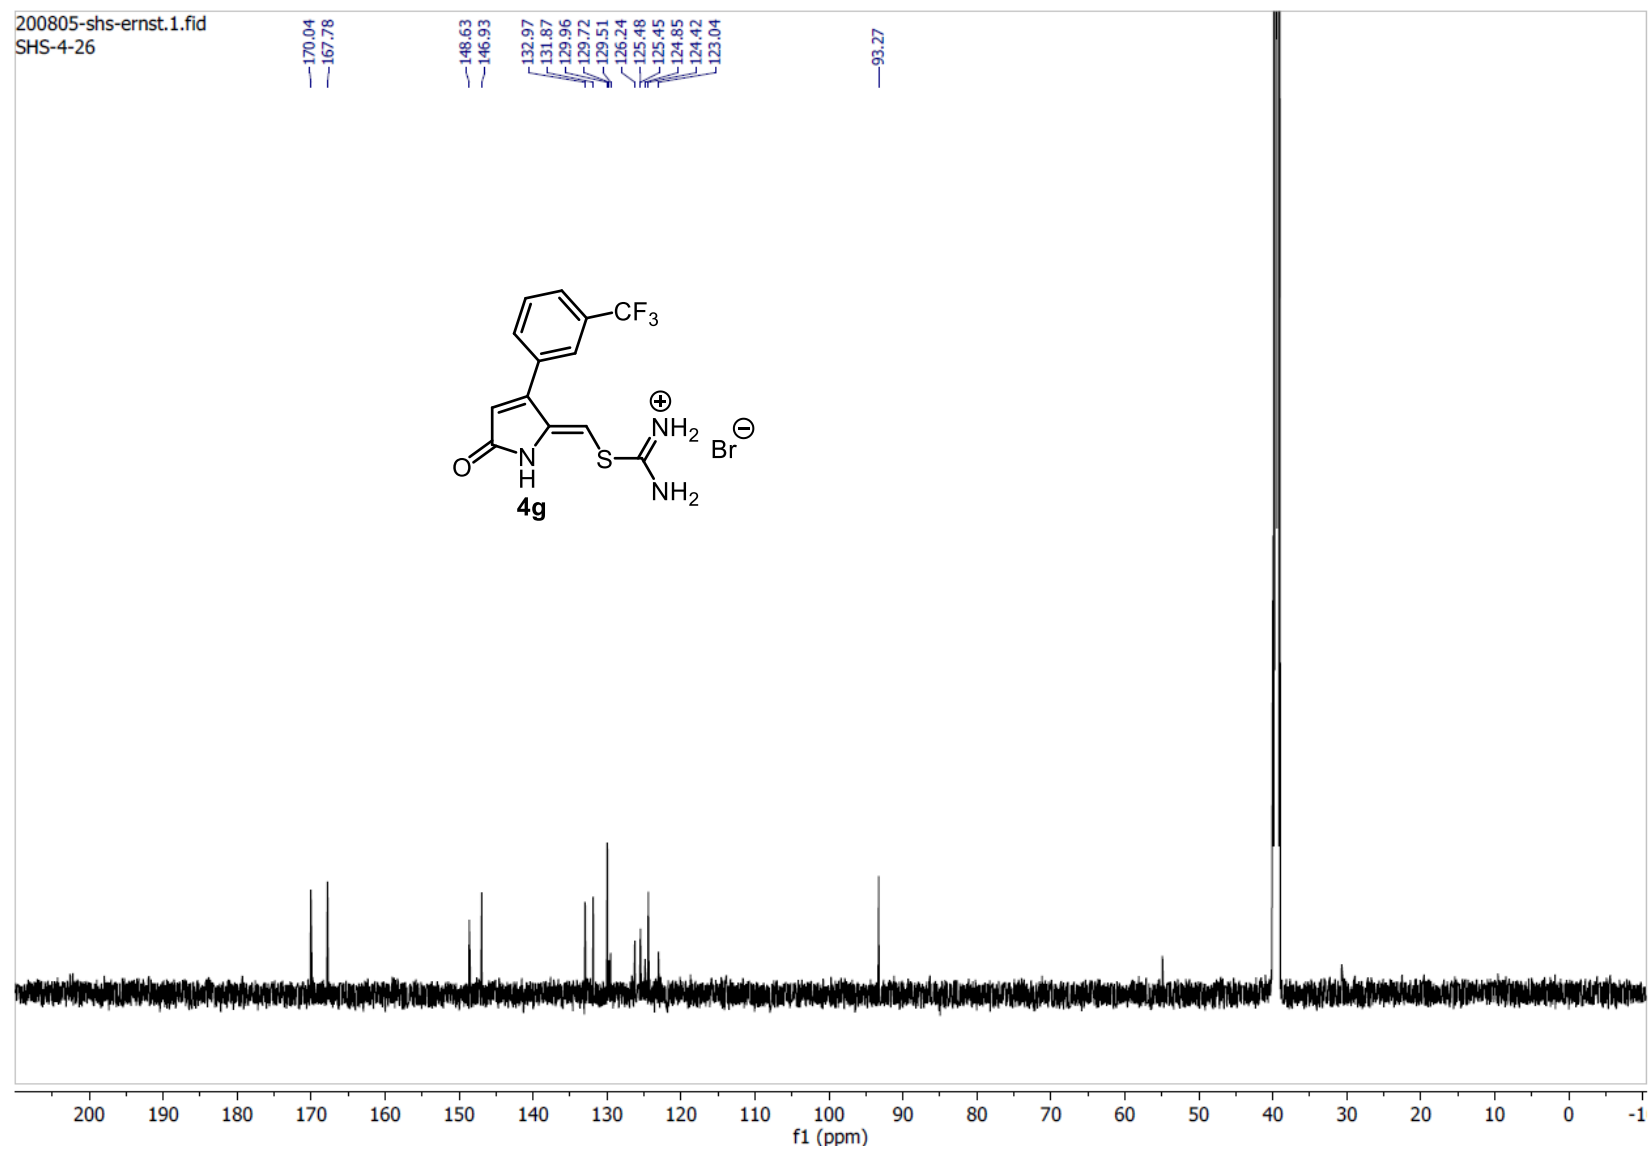



## Sample submission report

Sample Analysis Request # **3073456**  
Samples submitted by **Shekh Sabir**  
Date run **2020-11-17**  
Operator **Chowdhury Sarowar**  
Report prepared by **Chowdhury Sarowar**

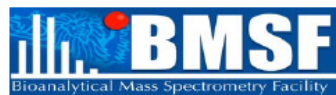

Notes:

Sample: shs-3-114

Full spectrum

shs-3-114\_Pos\_Full #6-8 RT: 0.30-0.41 Av: 3 NL: 9.32E8  
T: FTMS + p NSI Full ms [100.00-2000.00]

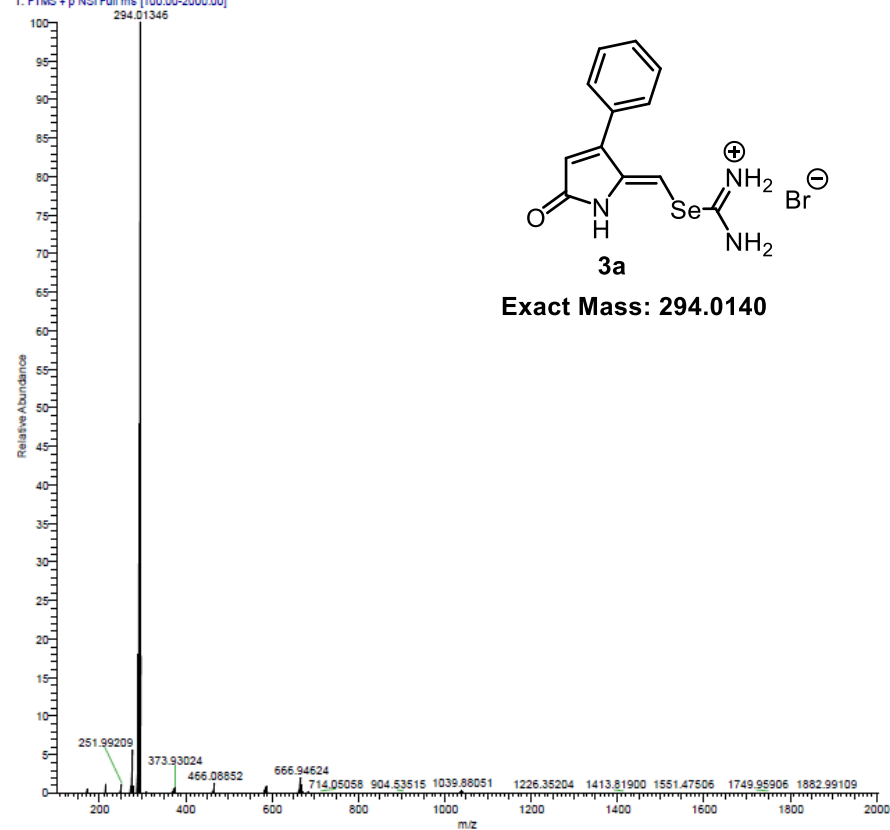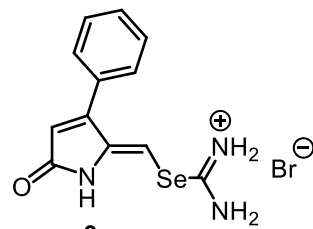

**Exact Mass: 294.0140**

## Sample submission report

Sample Analysis Request # **3073456**  
Samples submitted by **Shekh Sabir**  
Date run **2020-11-17**  
Operator **Chowdhury Sarowar**  
Report prepared by **Chowdhury Sarowar**

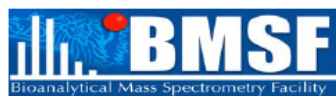

Notes:

Sample: shs-4-09

Full spectrum

shs-4-09\_Pos\_Full.ms#1-17 RT: 0.02-0.91 AV: 17 NL: 3.24E8  
T: FTMS + p NSI Full ms [100.00-2000.00]

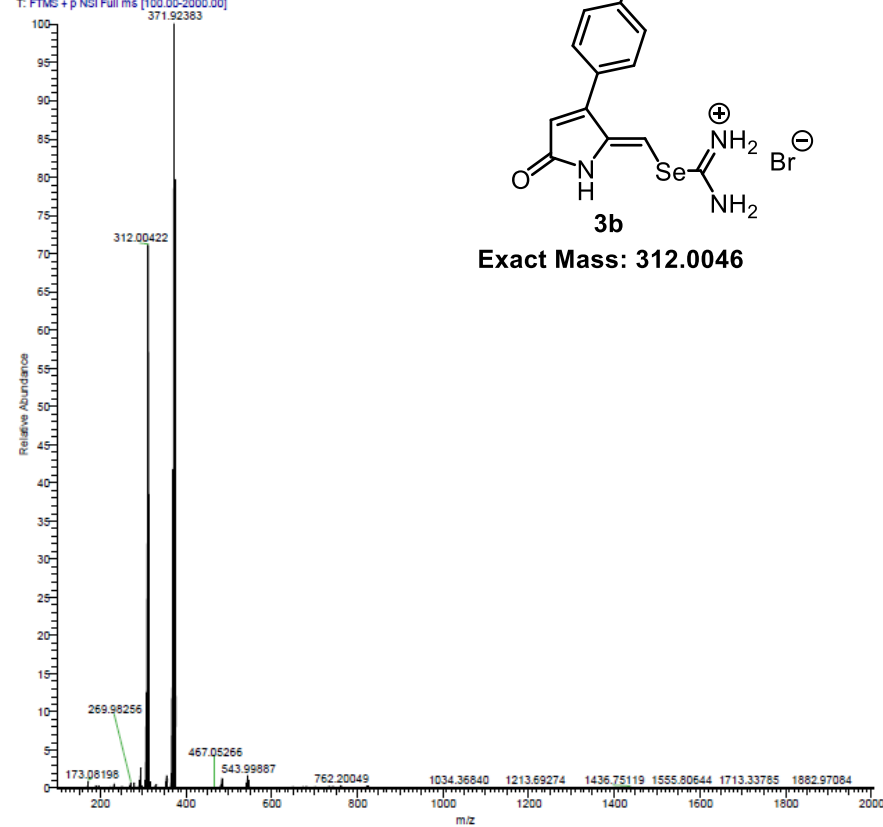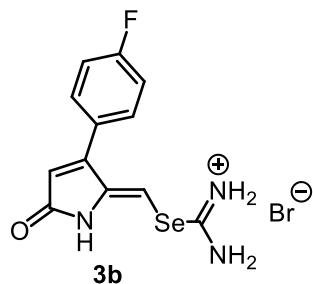

Exact Mass: 312.0046

### Sample submission report

Sample Analysis Request # **3073456**  
Samples submitted by **Shekh Sabir**  
Date run **2020-11-17**  
Operator **Chowdhury Sarowar**  
Report prepared by **Chowdhury Sarowar**

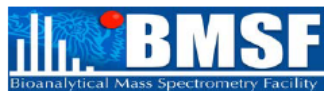

Notes:

Sample: shs-3-112

Full spectrum

shs-3-112\_Pos\_Full #2-9 RT: 0.08-0.47 AV: 8 NL: 5.87E8  
T: FTMS + p NSI Full ms [100.00-2000.00]

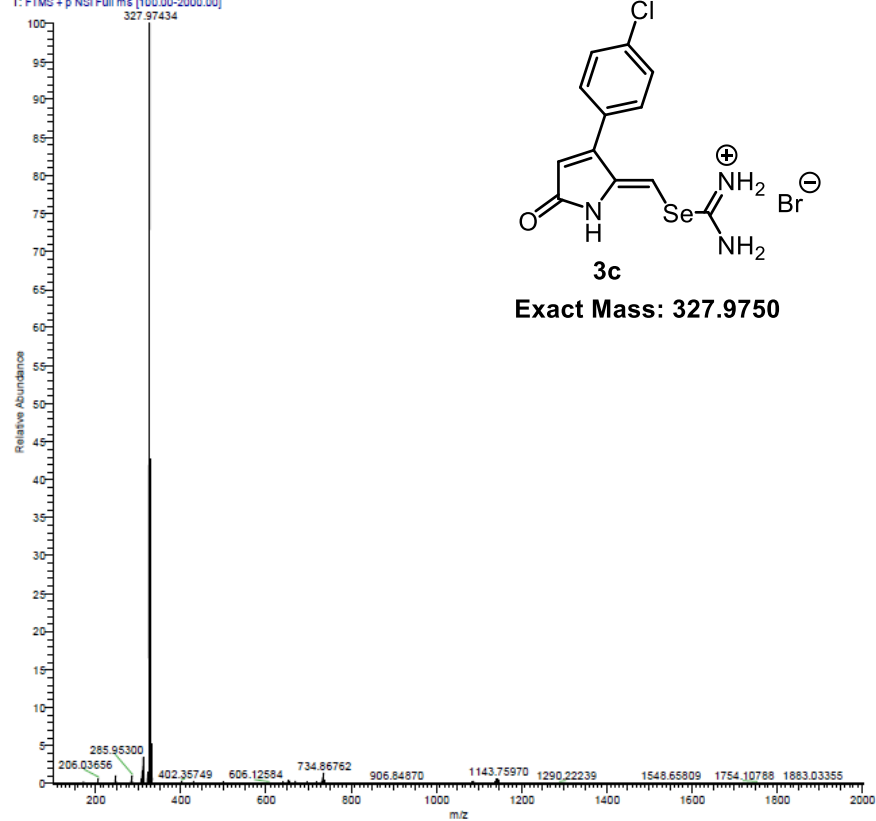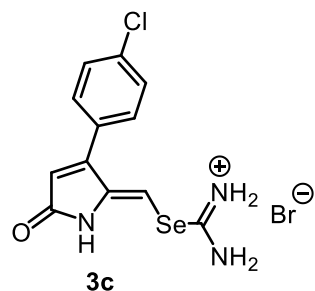

Exact Mass: 327.9750

## Sample submission report

Sample Analysis Request # **3073456**  
Samples submitted by **Shekh Sabir**  
Date run 2020-11-17  
Operator Chowdhury Sarowar  
Report prepared by Chowdhury Sarowar

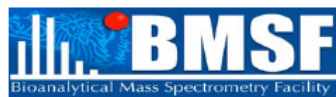

Notes:

Sample: shs-3-100

Full spectrum

shs-3-100\_Pos\_Full#1-7 RT: 0.02-0.35 Av: 7 NL: 2.71E8  
T: FTMS + p NSI Full ms [100.00-2000.00]

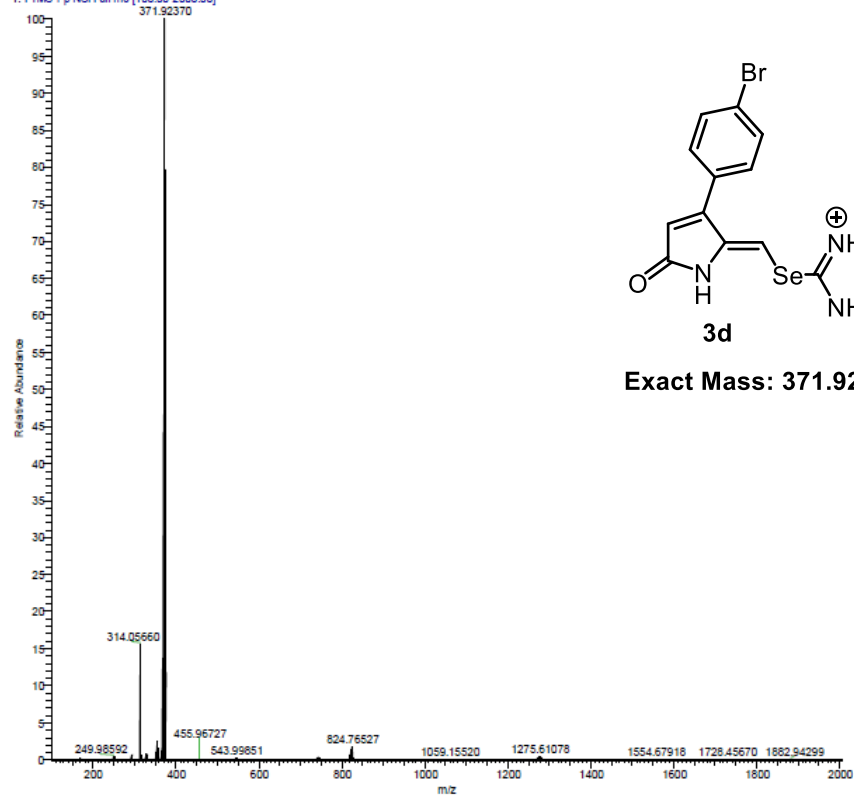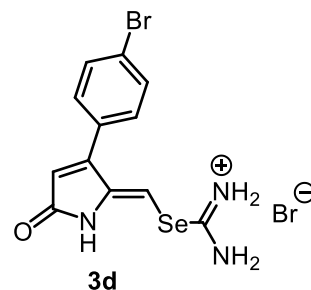

Exact Mass: 371.9245

### Sample submission report

Sample Analysis Request # **2997593**  
Samples submitted by **Sabir, Shekh**  
Date run **2020-08-11**  
Operator **Chowdhury Sarowar**  
Report prepared by **Chowdhury Sarowar**

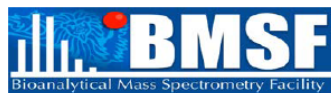

Notes:

Sample: shs-3-24

Full spectrum

shs-3-24\_Pos\_Full #13-23 RT: 0.73-1.31 AV: 11 NL: 5.61E7  
T: FTMS + p NSI Full ms [100.00-2000.00]

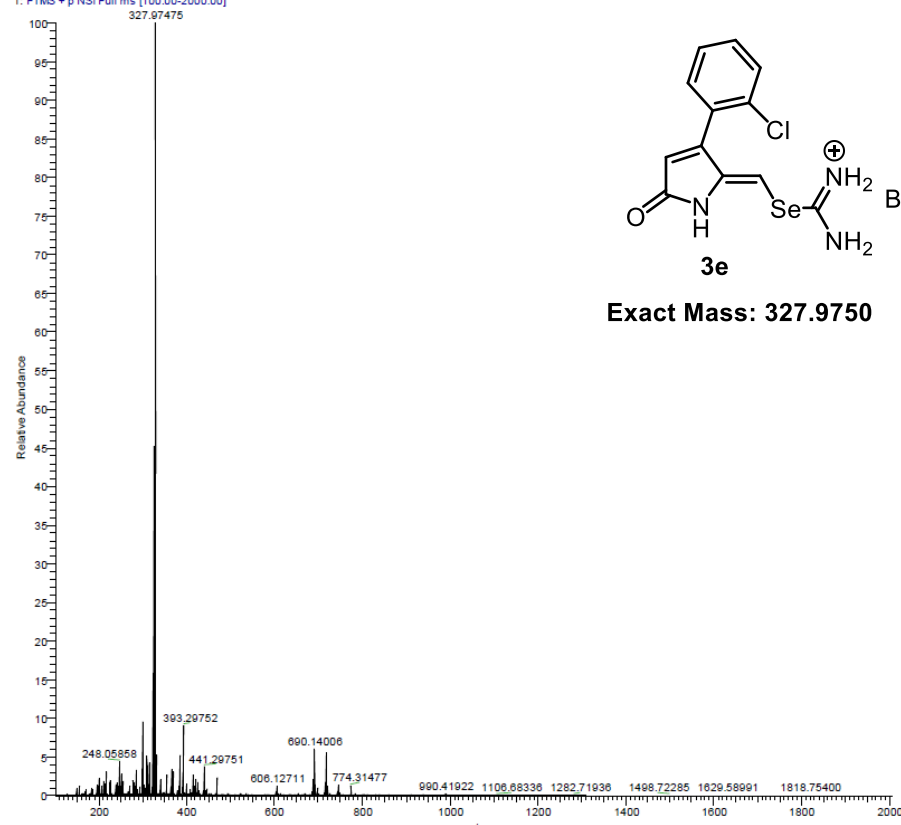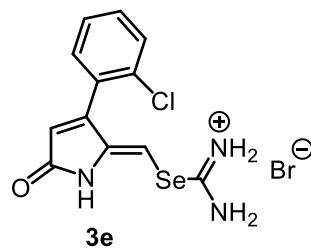

Exact Mass: 327.9750

### Sample submission report

Sample Analysis Request # **3073456**  
Samples submitted by **Shekh Sabir**  
Date run 2020-11-17  
Operator Chowdhury Sarowar  
Report prepared by Chowdhury Sarowar

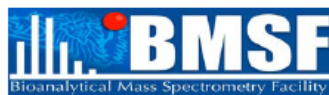

Notes:

Sample: shs-4-19

Full spectrum

shs-4-19\_Pos\_Full #1-7 RT: 0.02-0.36 Av: 7 NL: 1.62E8  
T: FTMS +p NSI Full ms [100.00-2000.00]

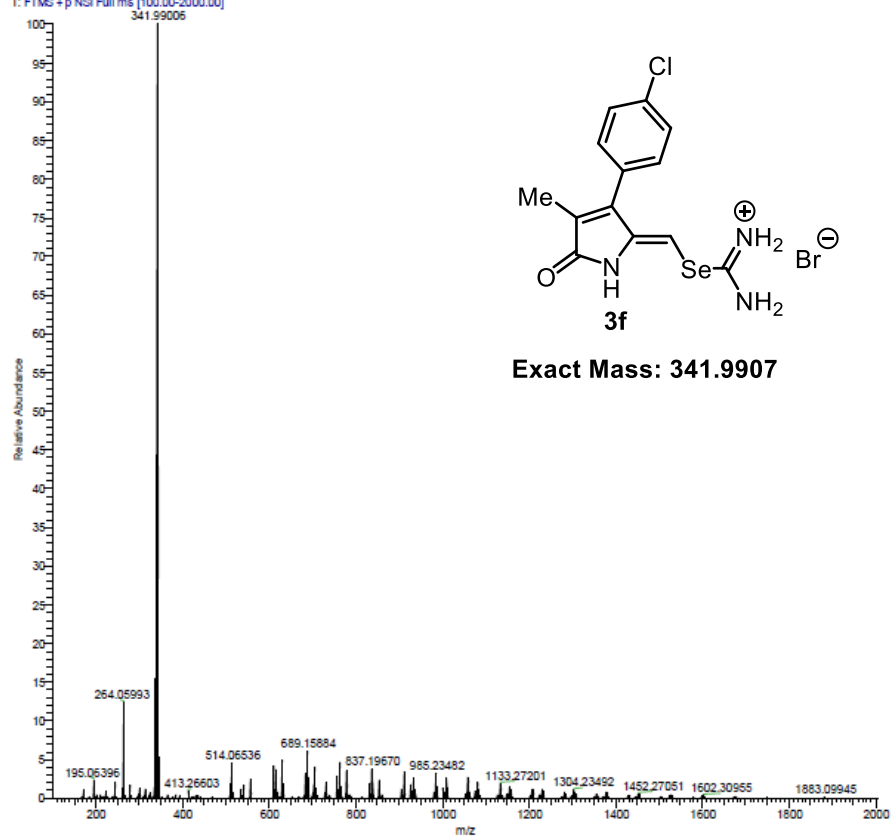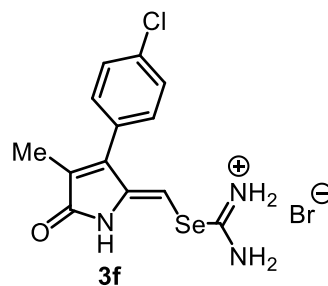

Exact Mass: 341.9907

## Sample submission report

Sample Analysis Request # **3073456**  
Samples submitted by **Shekh Sabir**  
Date run **2020-11-17**  
Operator **Chowdhury Sarowar**  
Report prepared by **Chowdhury Sarowar**

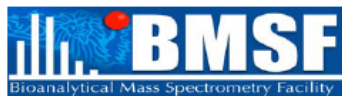

Notes:

Sample: shs-3-103

Full spectrum

shs-3-103\_Pos\_Full #1-7 RT: 0.02-0.36 Av: 7 NL: 5.58E8  
T: FTMS + p NSI Full ms [100.00-2000.00]

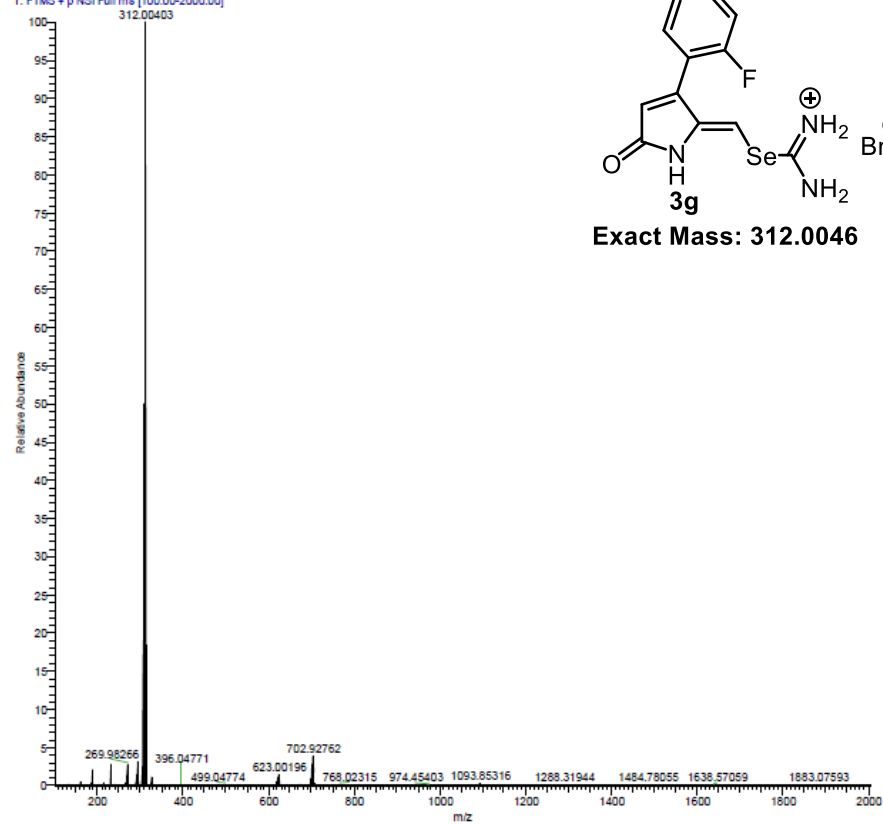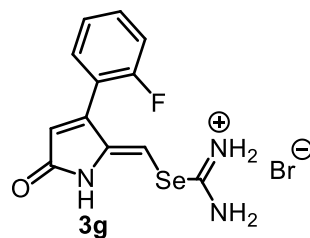

Exact Mass: 312.0046

### Sample submission report

Sample Analysis Request # **3073456**  
Samples submitted by **Shekh Sabir**  
Date run **2020-11-17**  
Operator **Chowdhury Sarowar**  
Report prepared by **Chowdhury Sarowar**

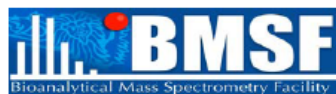

Notes:

Sample: shs-4-14

Full spectrum

shs-4-14\_Pos\_Full #1-18 RT: 0.02-0.97 AV: 18 NL: 1.54E8  
T: FTMS + p NSI Full ms [100.00-2000.00]

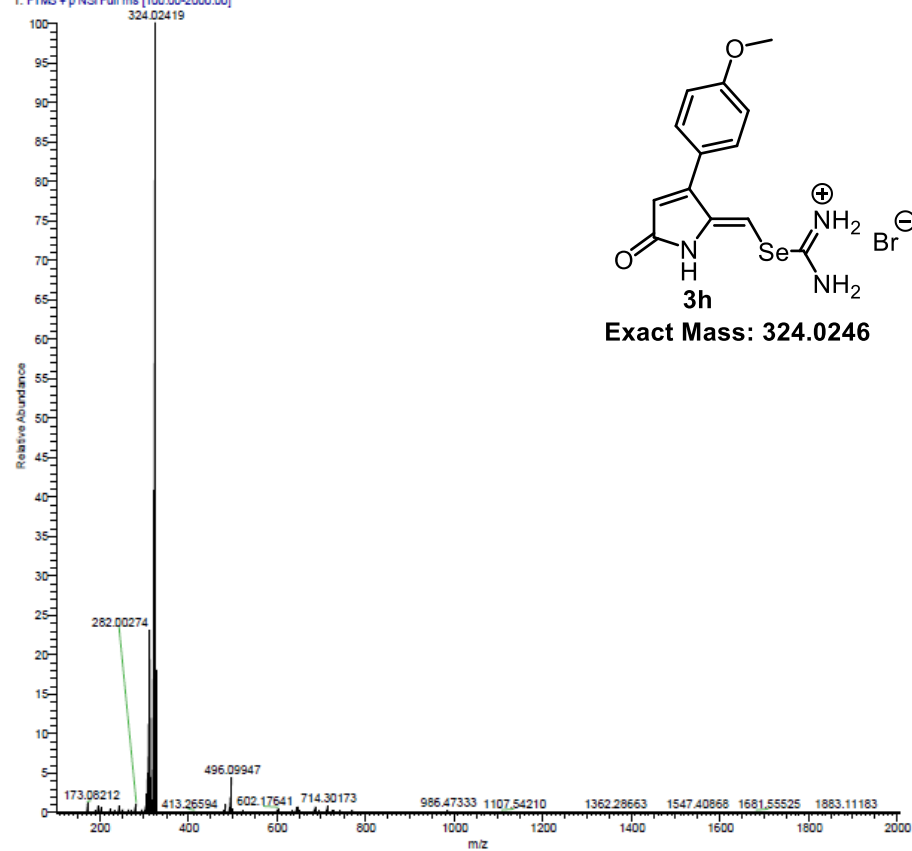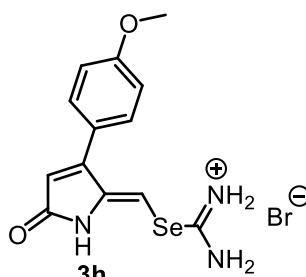

Exact Mass: 324.0246



## Sample submission report

Sample Analysis Request # **3073456**  
Samples submitted by **Shekh Sabir**  
Date run **2020-11-17**  
Operator **Chowdhury Sarowar**  
Report prepared by **Chowdhury Sarowar**

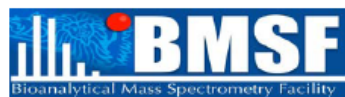

Notes:

Sample: shs-3-115

Full spectrum

shs-3-115\_Pos\_Full#15-20 RT: 0.80-1.08 AV: 6 NL: 3.42E8  
T: FTMS + p NSI Full ms [100.00-2000.00]

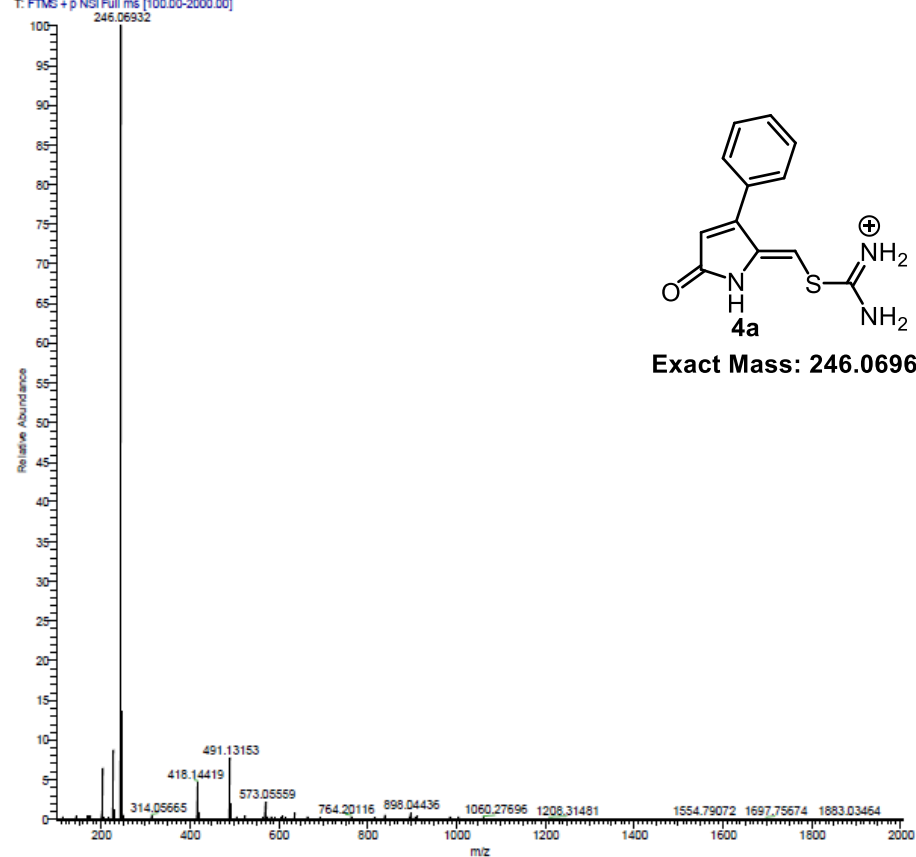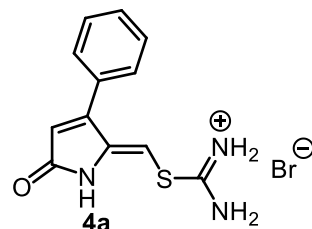

Exact Mass: 246.0696

### Sample submission report

Sample Analysis Request # **3073456**  
Samples submitted by **Shekh Sabir**  
Date run **2020-11-17**  
Operator **Chowdhury Sarowar**  
Report prepared by **Chowdhury Sarowar**

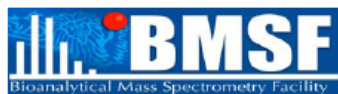

Notes:

Sample: shs-4-10

Full spectrum

shs-4-10\_Pos\_Full #2-12 RT: 0.08-0.63 AV: 11 NL: 2.49E8  
T: FTMS - p NSI Full ms (100.00-2000.00)

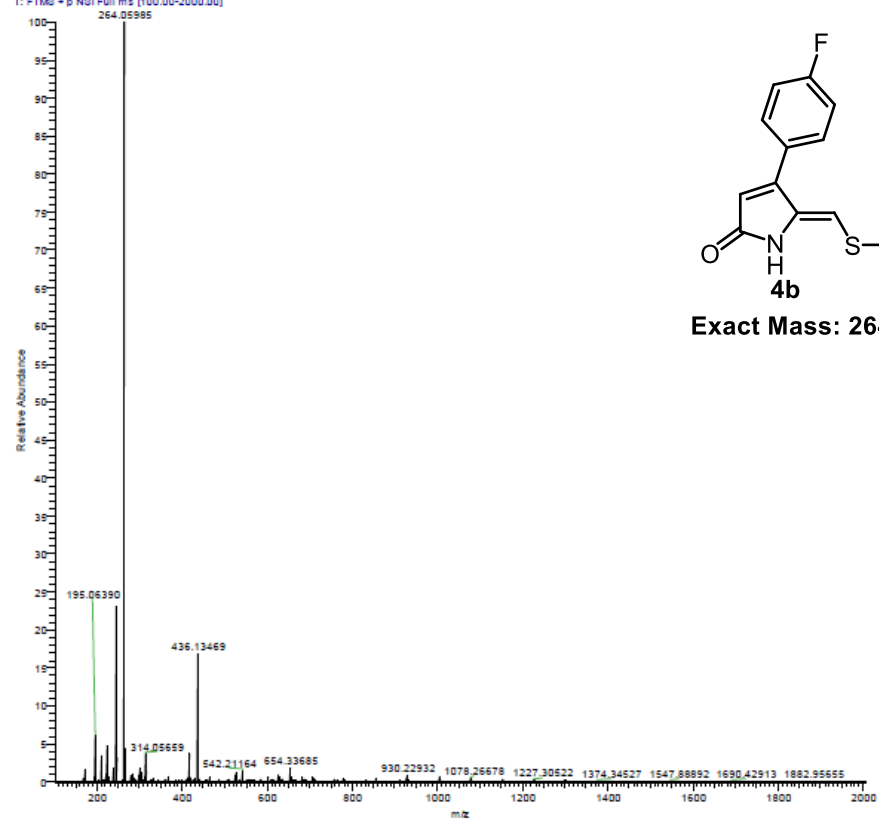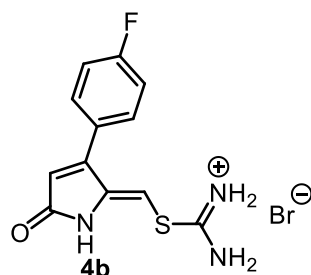

Exact Mass: 264.0601

### Sample submission report

Sample Analysis Request # **3073456**  
Samples submitted by **Shekh Sabir**  
Date run **2020-11-17**  
Operator **Chowdhury Sarwar**  
Report prepared by **Chowdhury Sarwar**

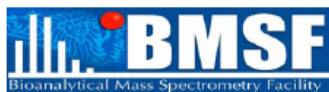

Notes:

Sample: shs-4-06

Full spectrum

shs-4-06\_Pos\_Full #8-18 RT: 0.41-0.97 AV: 11 NL: 6.24E8  
T: FTMS - p NCI Full ms (100.00-2000.00)

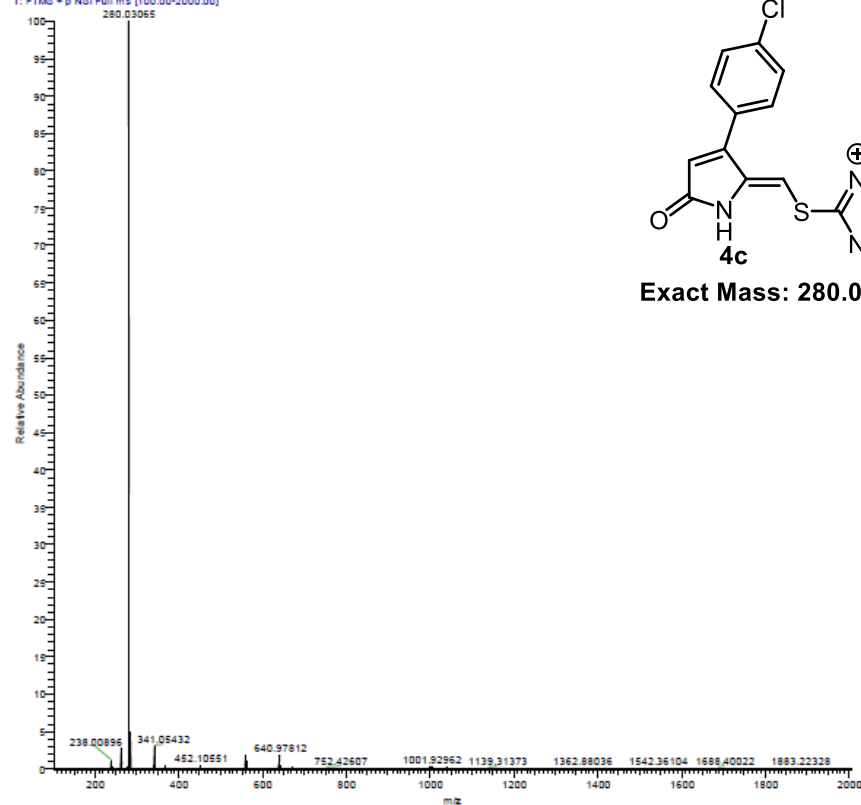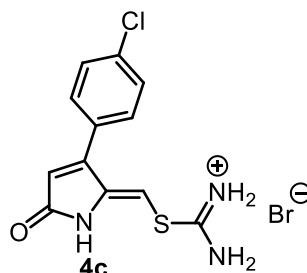

Exact Mass: 280.0306

### Sample submission report

Sample Analysis Request # **3073456**  
Samples submitted by **Shekh Sabir**  
Date run **2020-11-17**  
Operator **Chowdhury Sarowar**  
Report prepared by **Chowdhury Sarowar**

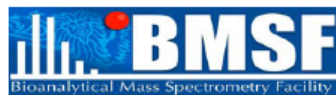

Notes:

Zoomed spectrum

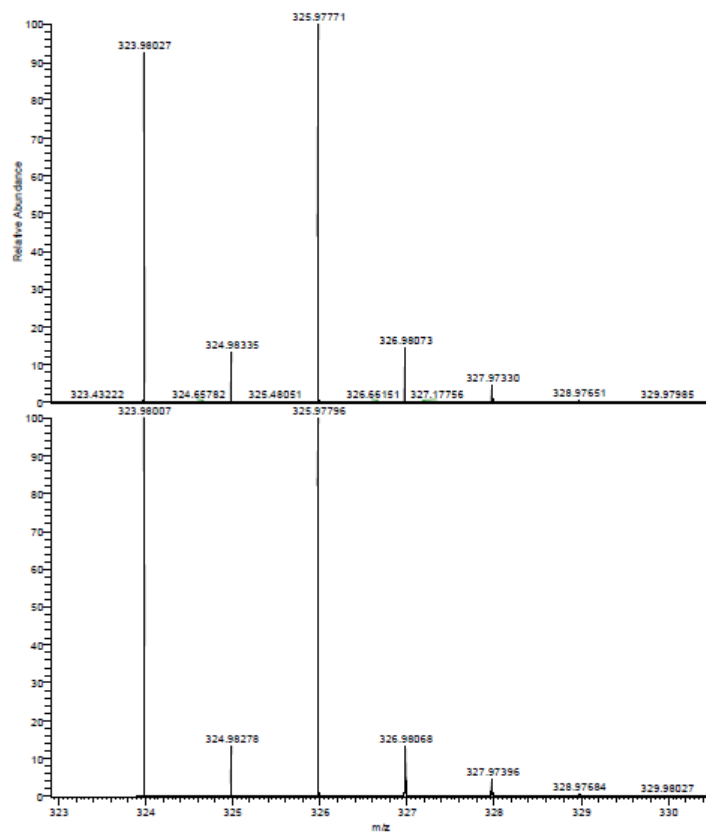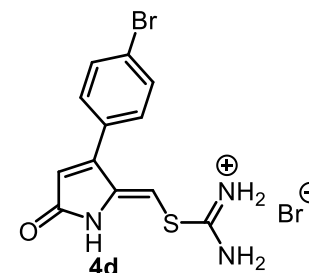

Exact Mass: 323.9801

### Sample submission report

Sample Analysis Request # **3073456**  
Samples submitted by **Shekh Sabir**  
Date run **2020-11-17**  
Operator **Chowdhury Sarowar**  
Report prepared by **Chowdhury Sarowar**

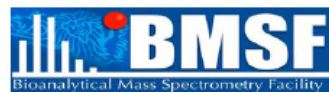

Notes:

Sample: shs-3-107

Full spectrum

shs-3-107\_Pos\_Full #1-7 RT: 0.02-0.36 AV: 7 NL: 2.00E8  
T: FTMS + p NSI Full ms [100.00-2000.00]

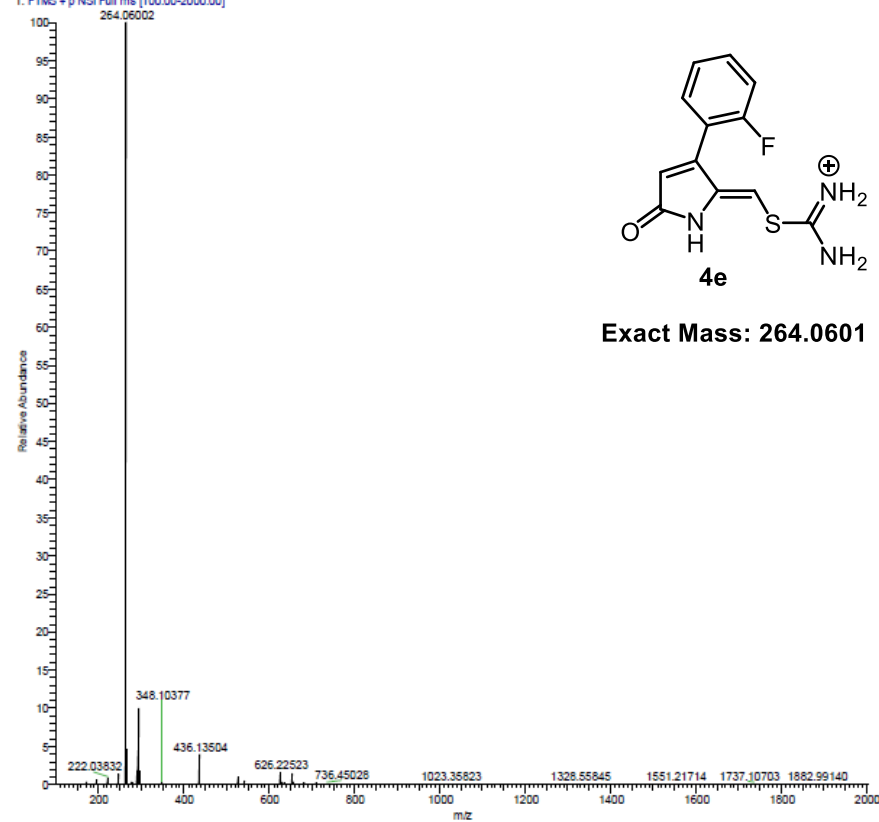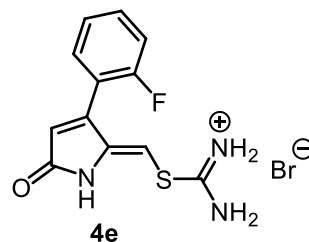

**Exact Mass: 264.0601**

Sample: shs-4-25

Full spectrum

shs-4-25\_Pos\_Full #8-13 RT: 0.41-0.69 AV: 6 NL: 6.51E8  
T: FTMS + p NSI Full ms [100.00-2000.00]

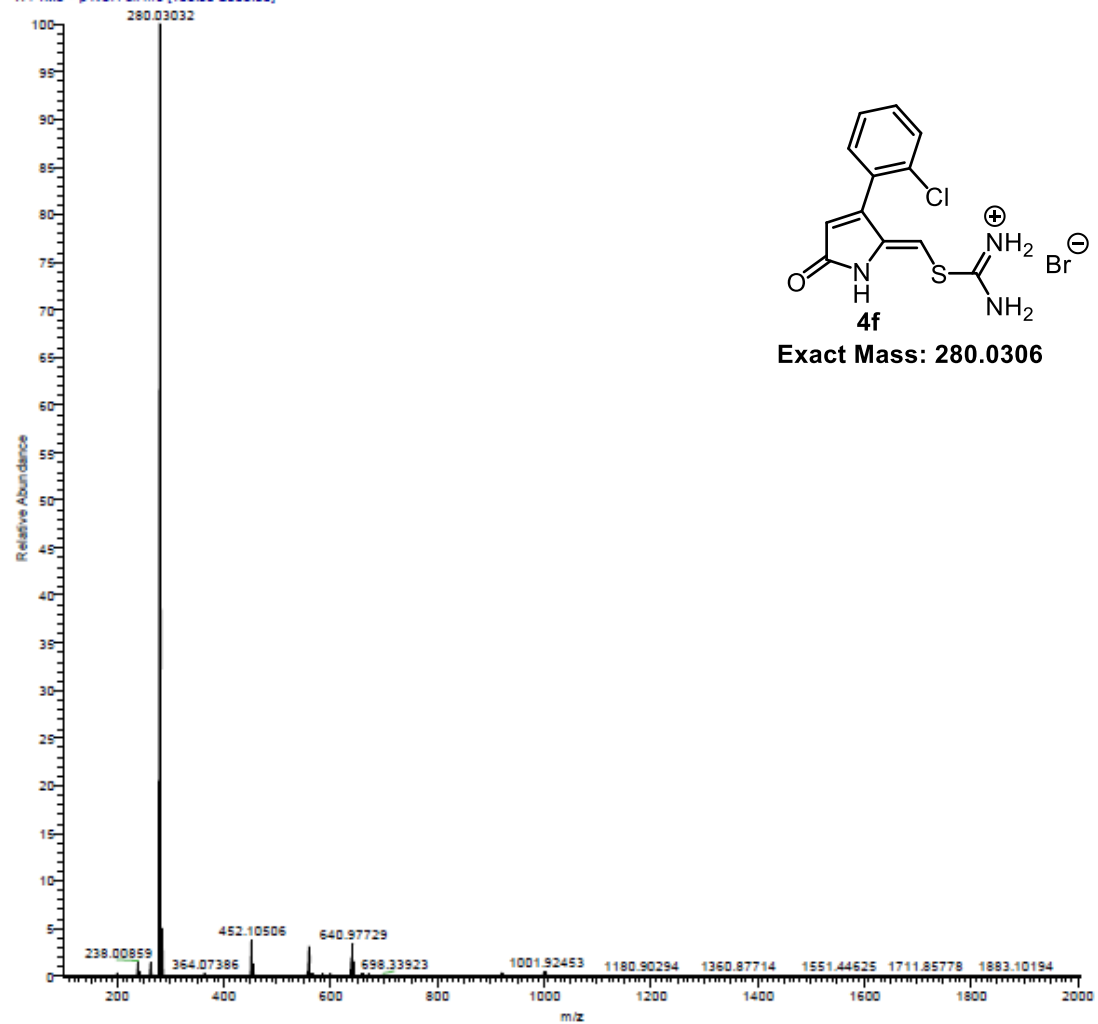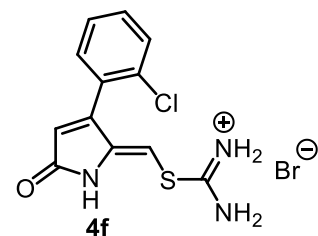

Exact Mass: 280.0306

### Sample submission report

Sample Analysis Request # **3073456**  
Samples submitted by **Shekh Sabir**  
Date run **2020-11-17**  
Operator **Chowdhury Sarwar**  
Report prepared by **Chowdhury Sarwar**

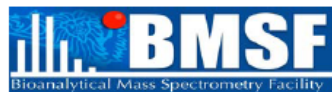

Notes:

Sample: shs-3-26

Full spectrum

shs-3-26\_Pos\_Full #5-12 RT: 0.25-0.64 AV: 8 NL: 4.93E8  
T: FTMS + p NSI Full ms [100.00-2000.00]

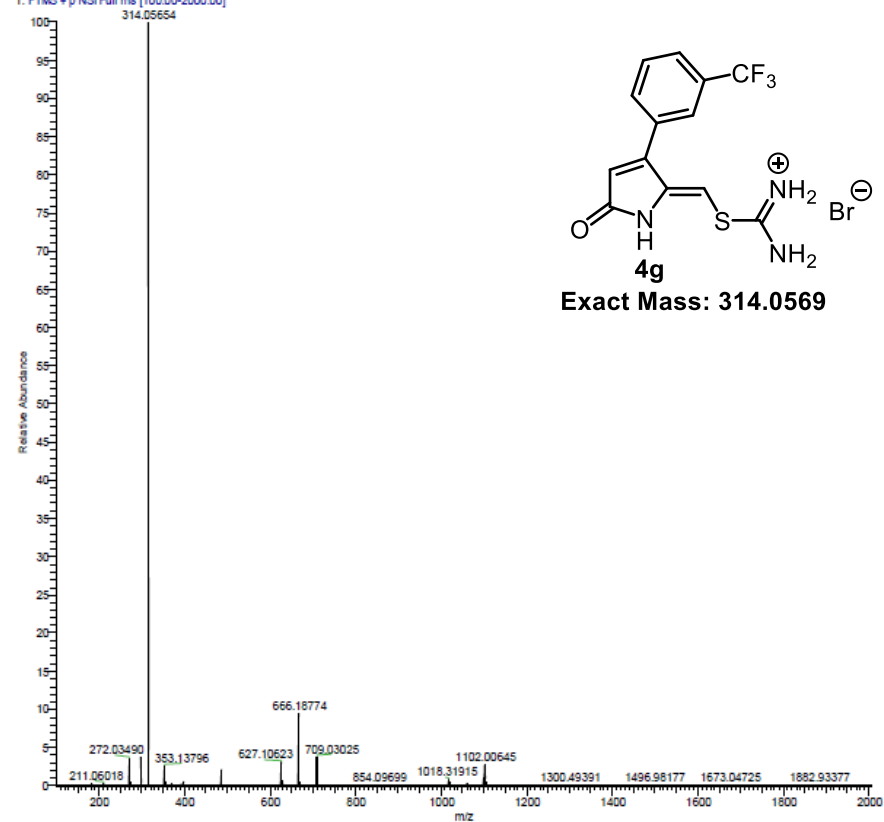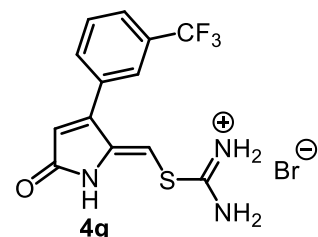

Exact Mass: 314.0569

Agilent Resolutions Pro

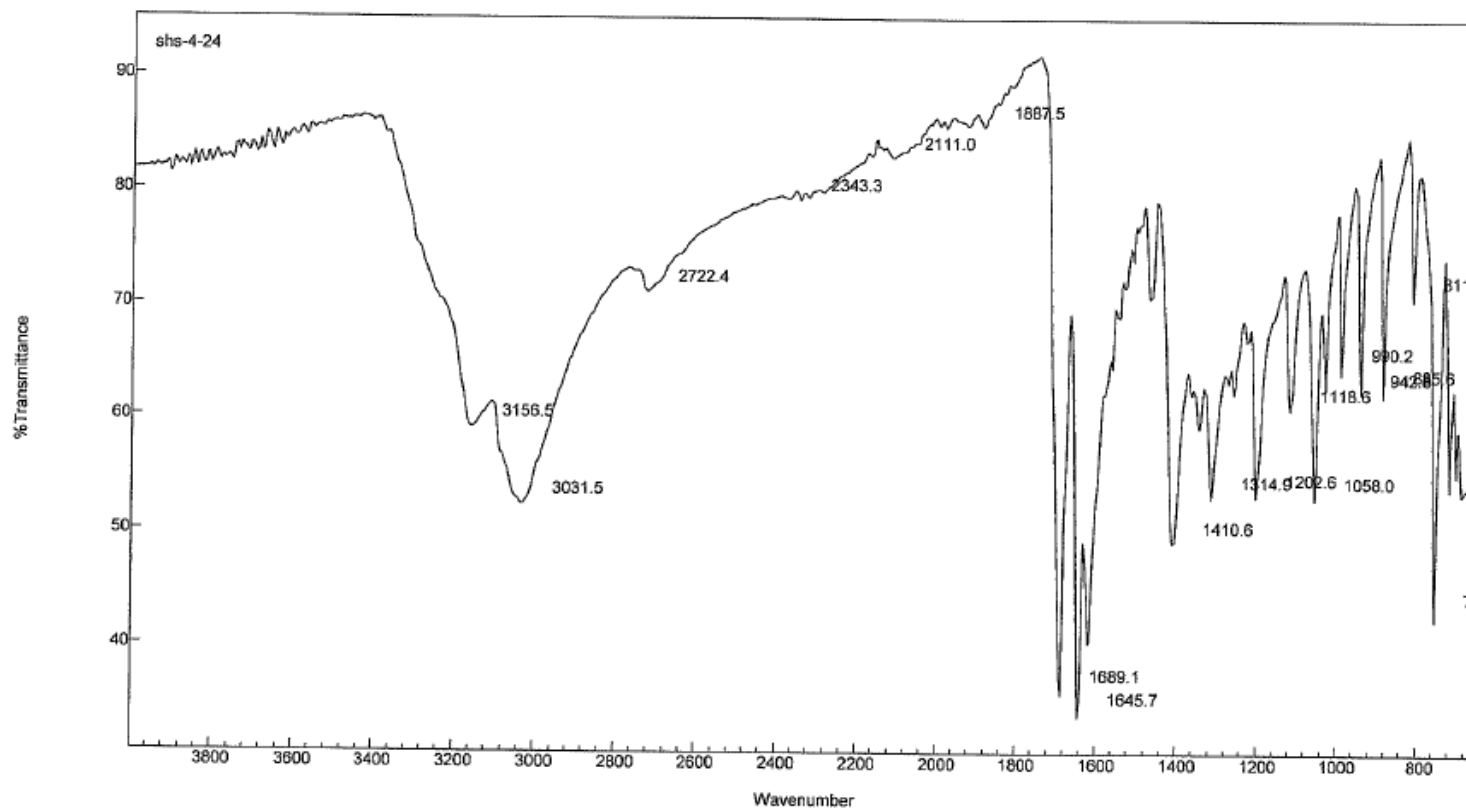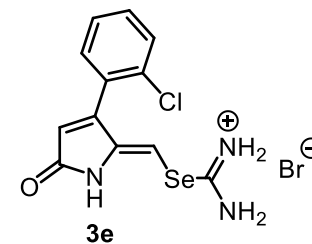

|          |
|----------|
| Name     |
| shs-4-24 |



Agilent Resolutions Pro

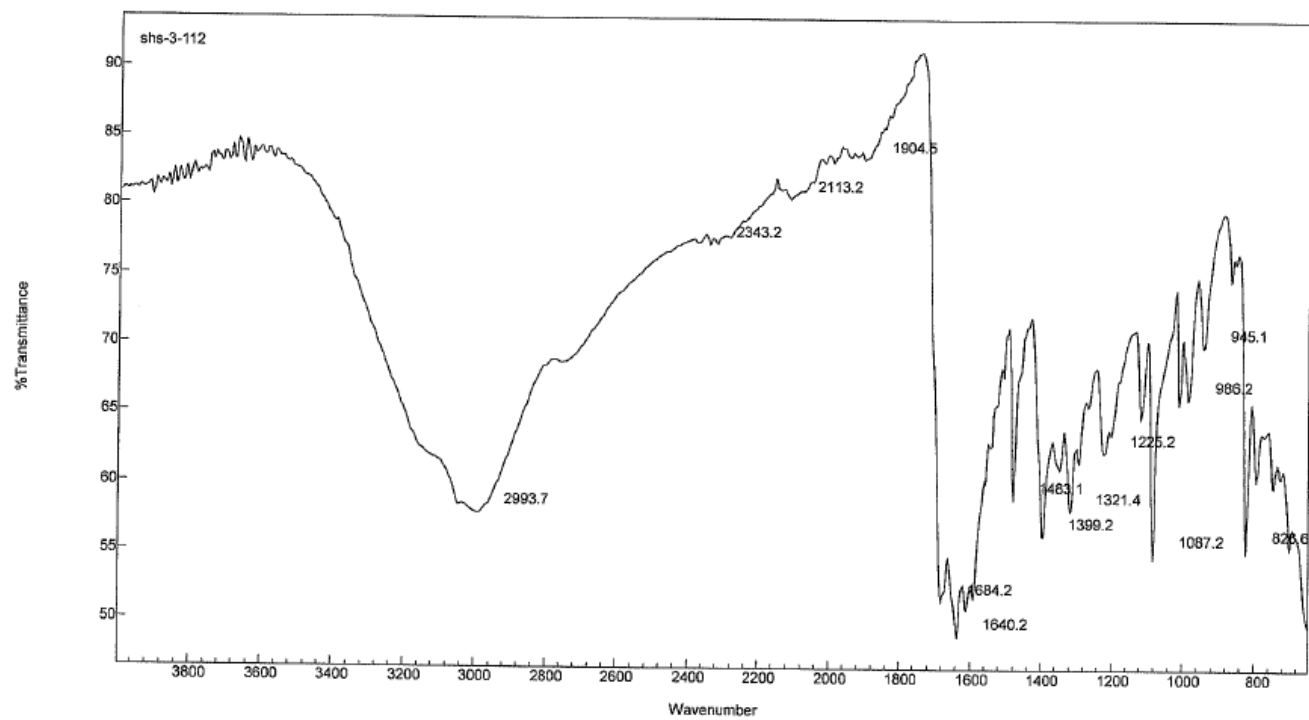

| Name      |
|-----------|
| shs-3-112 |

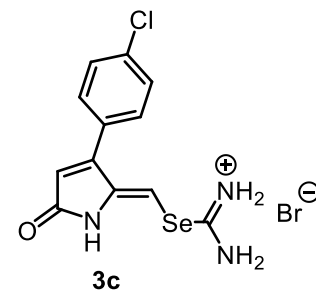

Agilent Resolutions Pro

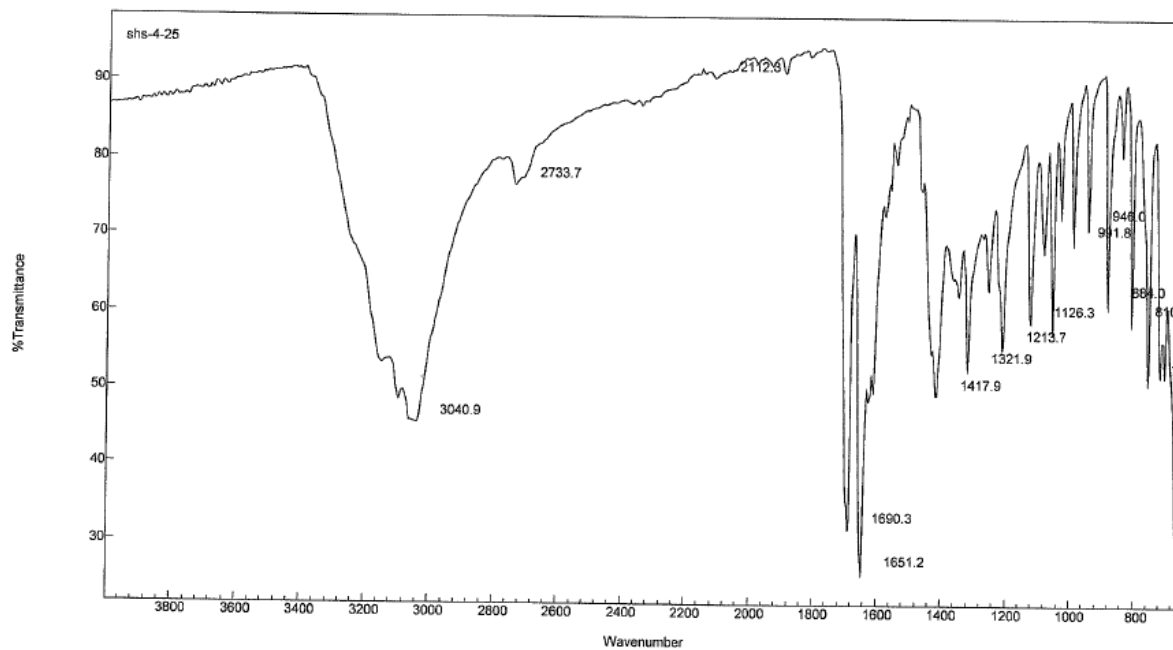

| Name     |
|----------|
| shs-4-25 |

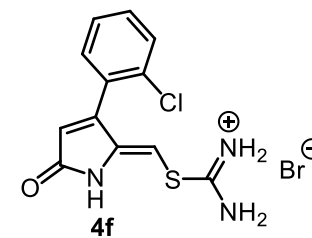

Agilent Resolutions Pro 4-26

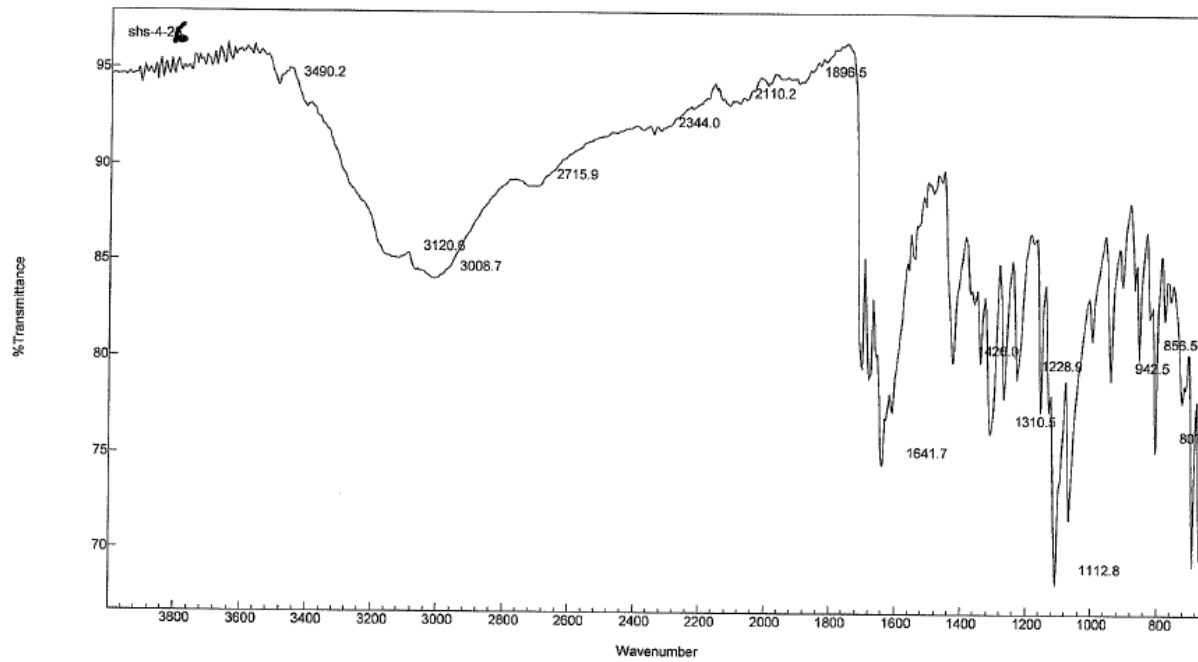

| Name     |
|----------|
| shs-4-25 |

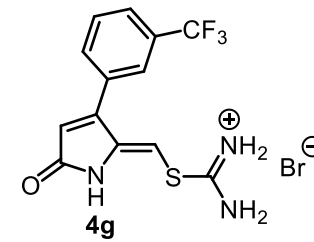

Agilent Resolutions Pro

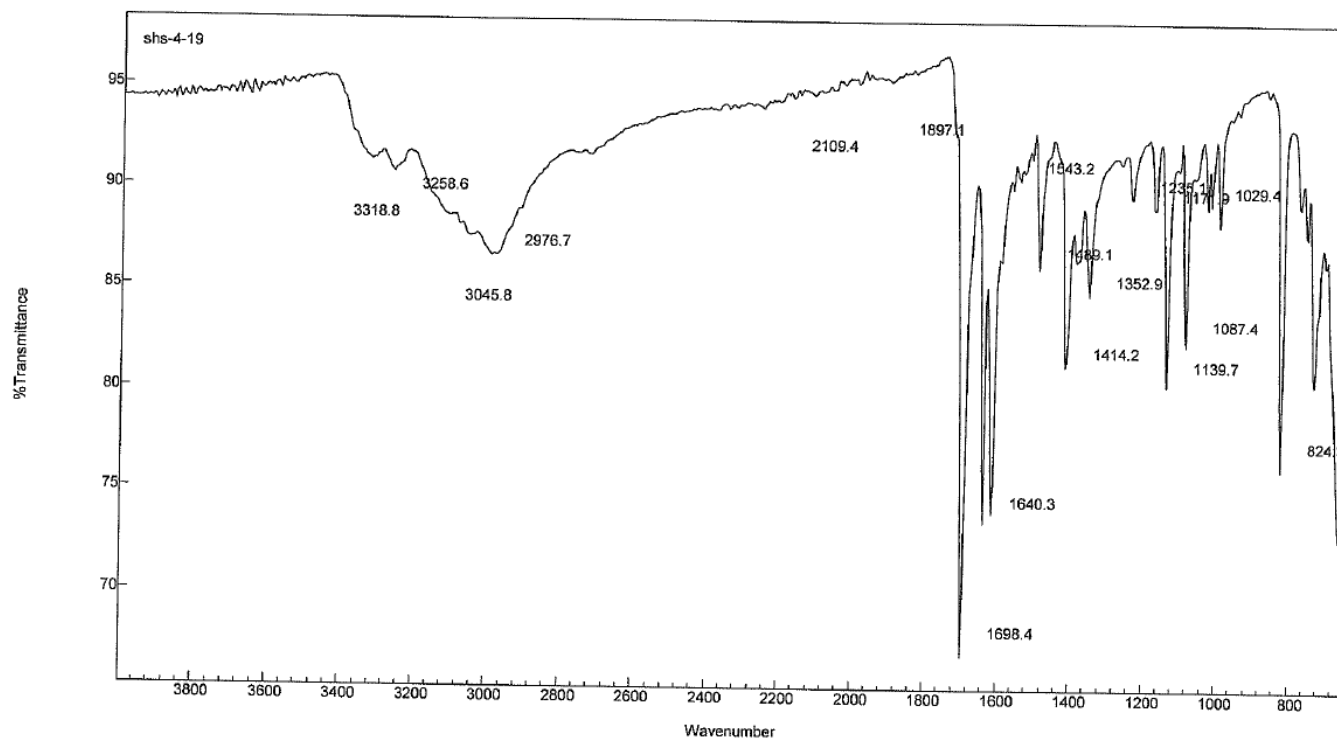

|          |
|----------|
| Name     |
| shs-4-19 |

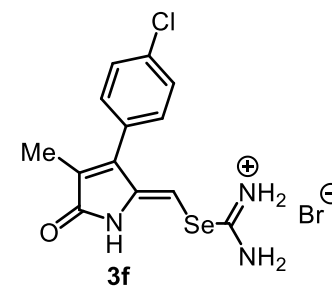

### Effect on bacterial growth

| Compound | % Growth inhibition data ( <i>P. aeruginosa</i> MH602) |                 |                |
|----------|--------------------------------------------------------|-----------------|----------------|
|          | 125 $\mu$ M                                            | 61.5 $\mu$ M    | 31 $\mu$ M     |
| 3a       | 49.8 $\pm$ 7.6                                         | 33.7 $\pm$ 7.6  | 19.2 $\pm$ 3.6 |
| 3b       | 26.9 $\pm$ 3.4                                         | 12.4 $\pm$ 1.8  | 7.9 $\pm$ 7.2  |
| 3c       | 41.1 $\pm$ 6.8                                         | 32.2 $\pm$ 2.7  | 22.8 $\pm$ 3.3 |
| 3d       | 39.5 $\pm$ 2.7                                         | 31.8 $\pm$ 3.3  | 16.7 $\pm$ 3.0 |
| 3e       | 36.2 $\pm$ 7.5                                         | 25.8 $\pm$ 4.6  | 10.5 $\pm$ 4.5 |
| 3f       | 23.7 $\pm$ 3.4                                         | 12.4 $\pm$ 1.8  | 7.9 $\pm$ 7.2  |
| 3g       | 32.1 $\pm$ 6.8                                         | 21.3 $\pm$ 2.8  | 9.2 $\pm$ 8.1  |
| 3h       | 26.9 $\pm$ 14.4                                        | 21.8 $\pm$ 3.2  | 1.3 $\pm$ 1.13 |
| 4a       | 18.9 $\pm$ 11.3                                        | 7.7 $\pm$ 4.1   | 3.3 $\pm$ 2.3  |
| 4b       | 10.4 $\pm$ 9.1                                         | 4.4 $\pm$ 4.4   | 0.0 $\pm$ 0.0  |
| 4c       | 30.0 $\pm$ 3.9                                         | 19.5 $\pm$ 2.3  | 10.6 $\pm$ 7.3 |
| 4d       | 34.9 $\pm$ 2.2                                         | 25.3 $\pm$ 7.9  | 15.2 $\pm$ 4.0 |
| 4e       | 55.6 $\pm$ 3.4                                         | 43.4 $\pm$ 6.9  | 30.0 $\pm$ 2.2 |
| 4f       | 33.3 $\pm$ 7.2                                         | 33.9 $\pm$ 5.7  | 33.1 $\pm$ 5.8 |
| 4g       | 58.9 $\pm$ 5.5                                         | 46.8 $\pm$ 4.3  | 36.0 $\pm$ 8.9 |
| Fu 30    | 50.2 $\pm$ 3.4                                         | 40.5 $\pm$ 21.9 | 22.8 $\pm$ 8.1 |
